# Supplementary material
Source: MDPI journal article supplement (https://www.mdpi.com/2073-4441/10/1/51)

## **Additional Trees**

**This file contains additional raw classification tree outputs not included in the main article, including outputs generated for specific treatment subsets of NAP (Non-agglomeration payment) and AP (Agglomeration payment). Each case includes the following: i) a plot of OOB prediction error for both the 'min' and 'se' approaches to selecting optimal trees, ii) a tree drawing for each of the 'min' and 'se' cases, and iii) a summary of cases and predictions at each node.**

# FullSample-CA

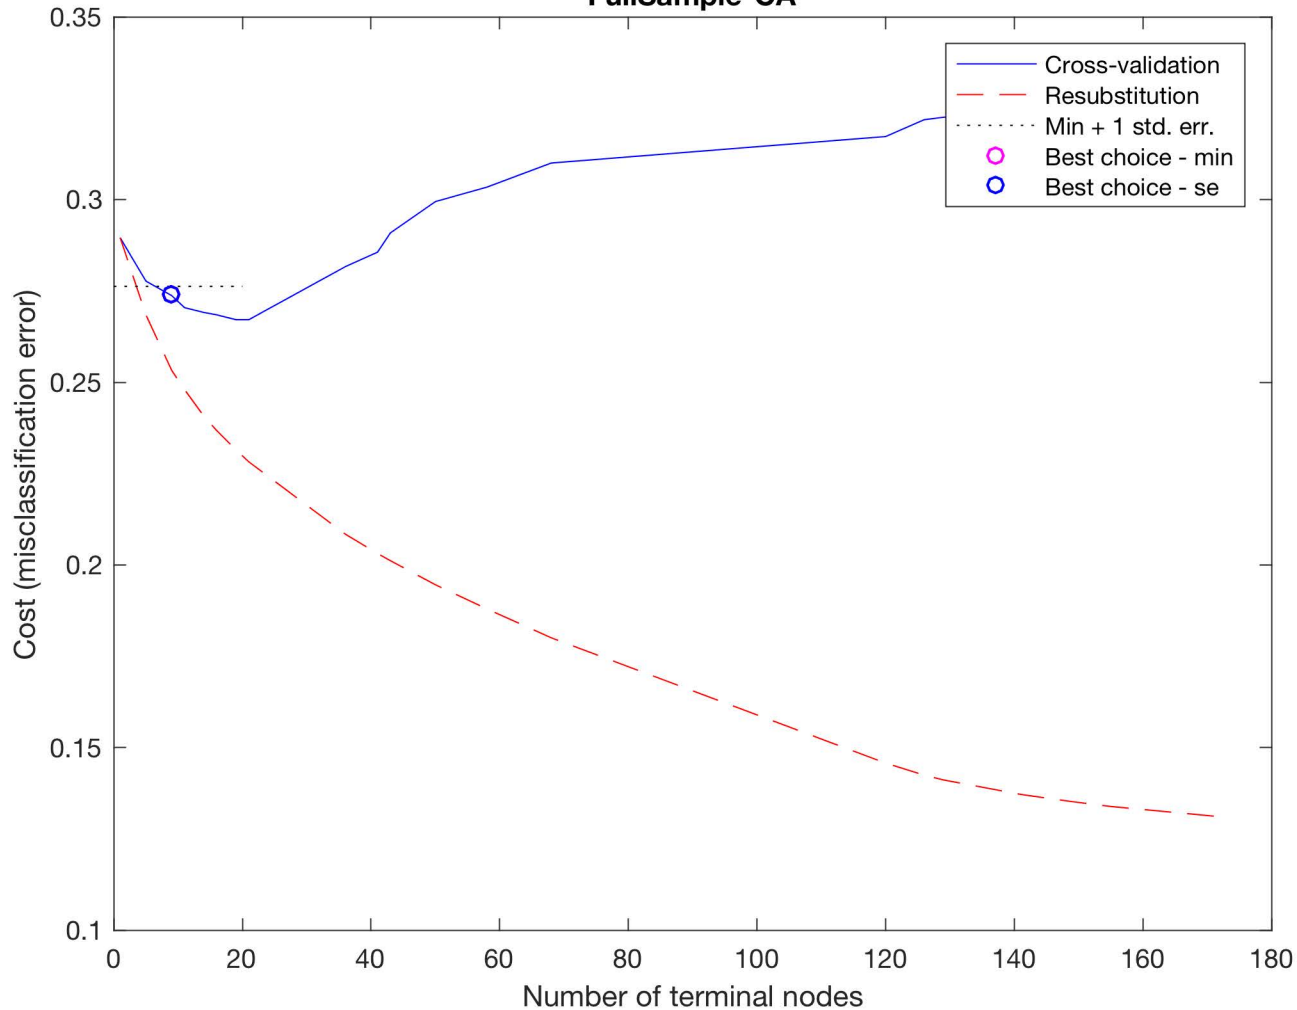

| Node | ProbFalse  | ProbTrue   | Cases |
|------|------------|------------|-------|
| 2    | 0.85569986 | 0.14430014 | 693   |
| 6    | 0.79591837 | 0.20408163 | 98    |
| 8    | 0.58041958 | 0.41958042 | 143   |
| 10   | 0.73451327 | 0.26548673 | 113   |
| 12   | 0.63157895 | 0.36842105 | 38    |
| 13   | 0.37878788 | 0.62121212 | 132   |
| 15   | 0.6462585  | 0.3537415  | 147   |
| 16   | 0.35443038 | 0.64556962 | 79    |
| 17   | 0.5890411  | 0.4109589  | 73    |

# FullSample-CA - MIN

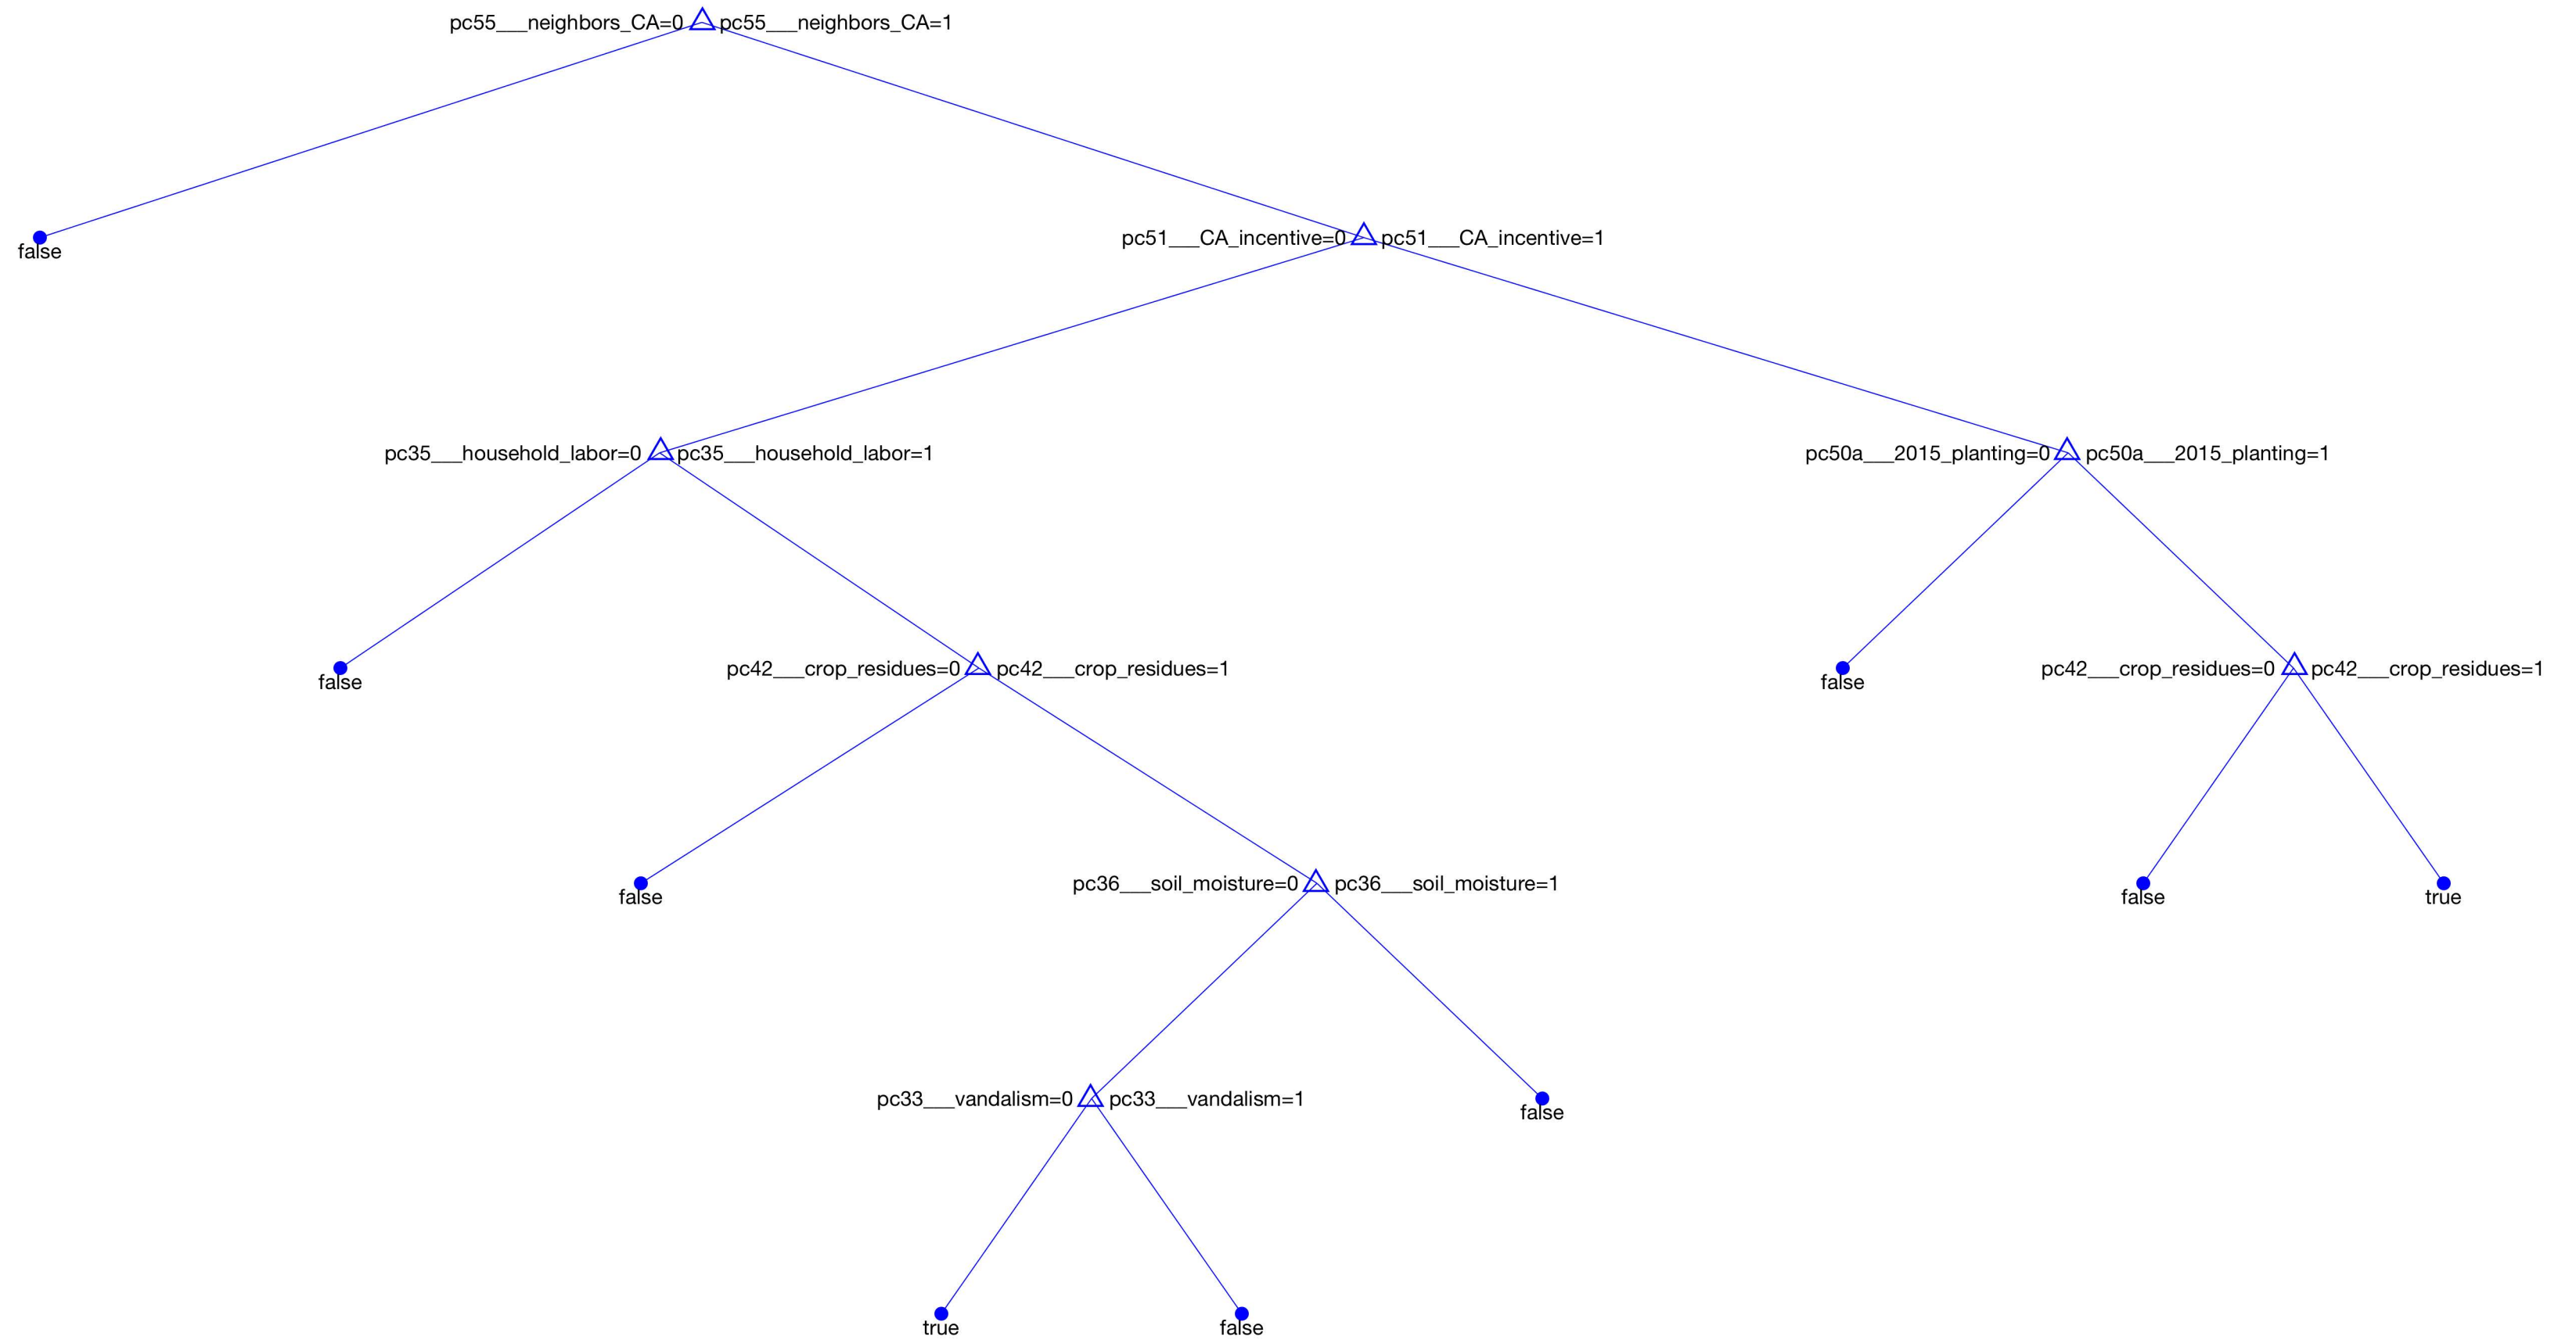



| Node | ProbFalse  | ProbTrue   | Cases |
|------|------------|------------|-------|
| 2    | 0.85569986 | 0.14430014 | 693   |
| 6    | 0.79591837 | 0.20408163 | 98    |
| 8    | 0.58041958 | 0.41958042 | 143   |
| 10   | 0.73451327 | 0.26548673 | 113   |
| 12   | 0.63157895 | 0.36842105 | 38    |
| 13   | 0.37878788 | 0.62121212 | 132   |
| 15   | 0.6462585  | 0.3537415  | 147   |
| 16   | 0.35443038 | 0.64556962 | 79    |
| 17   | 0.5890411  | 0.4109589  | 73    |

FullSample-CA - SE

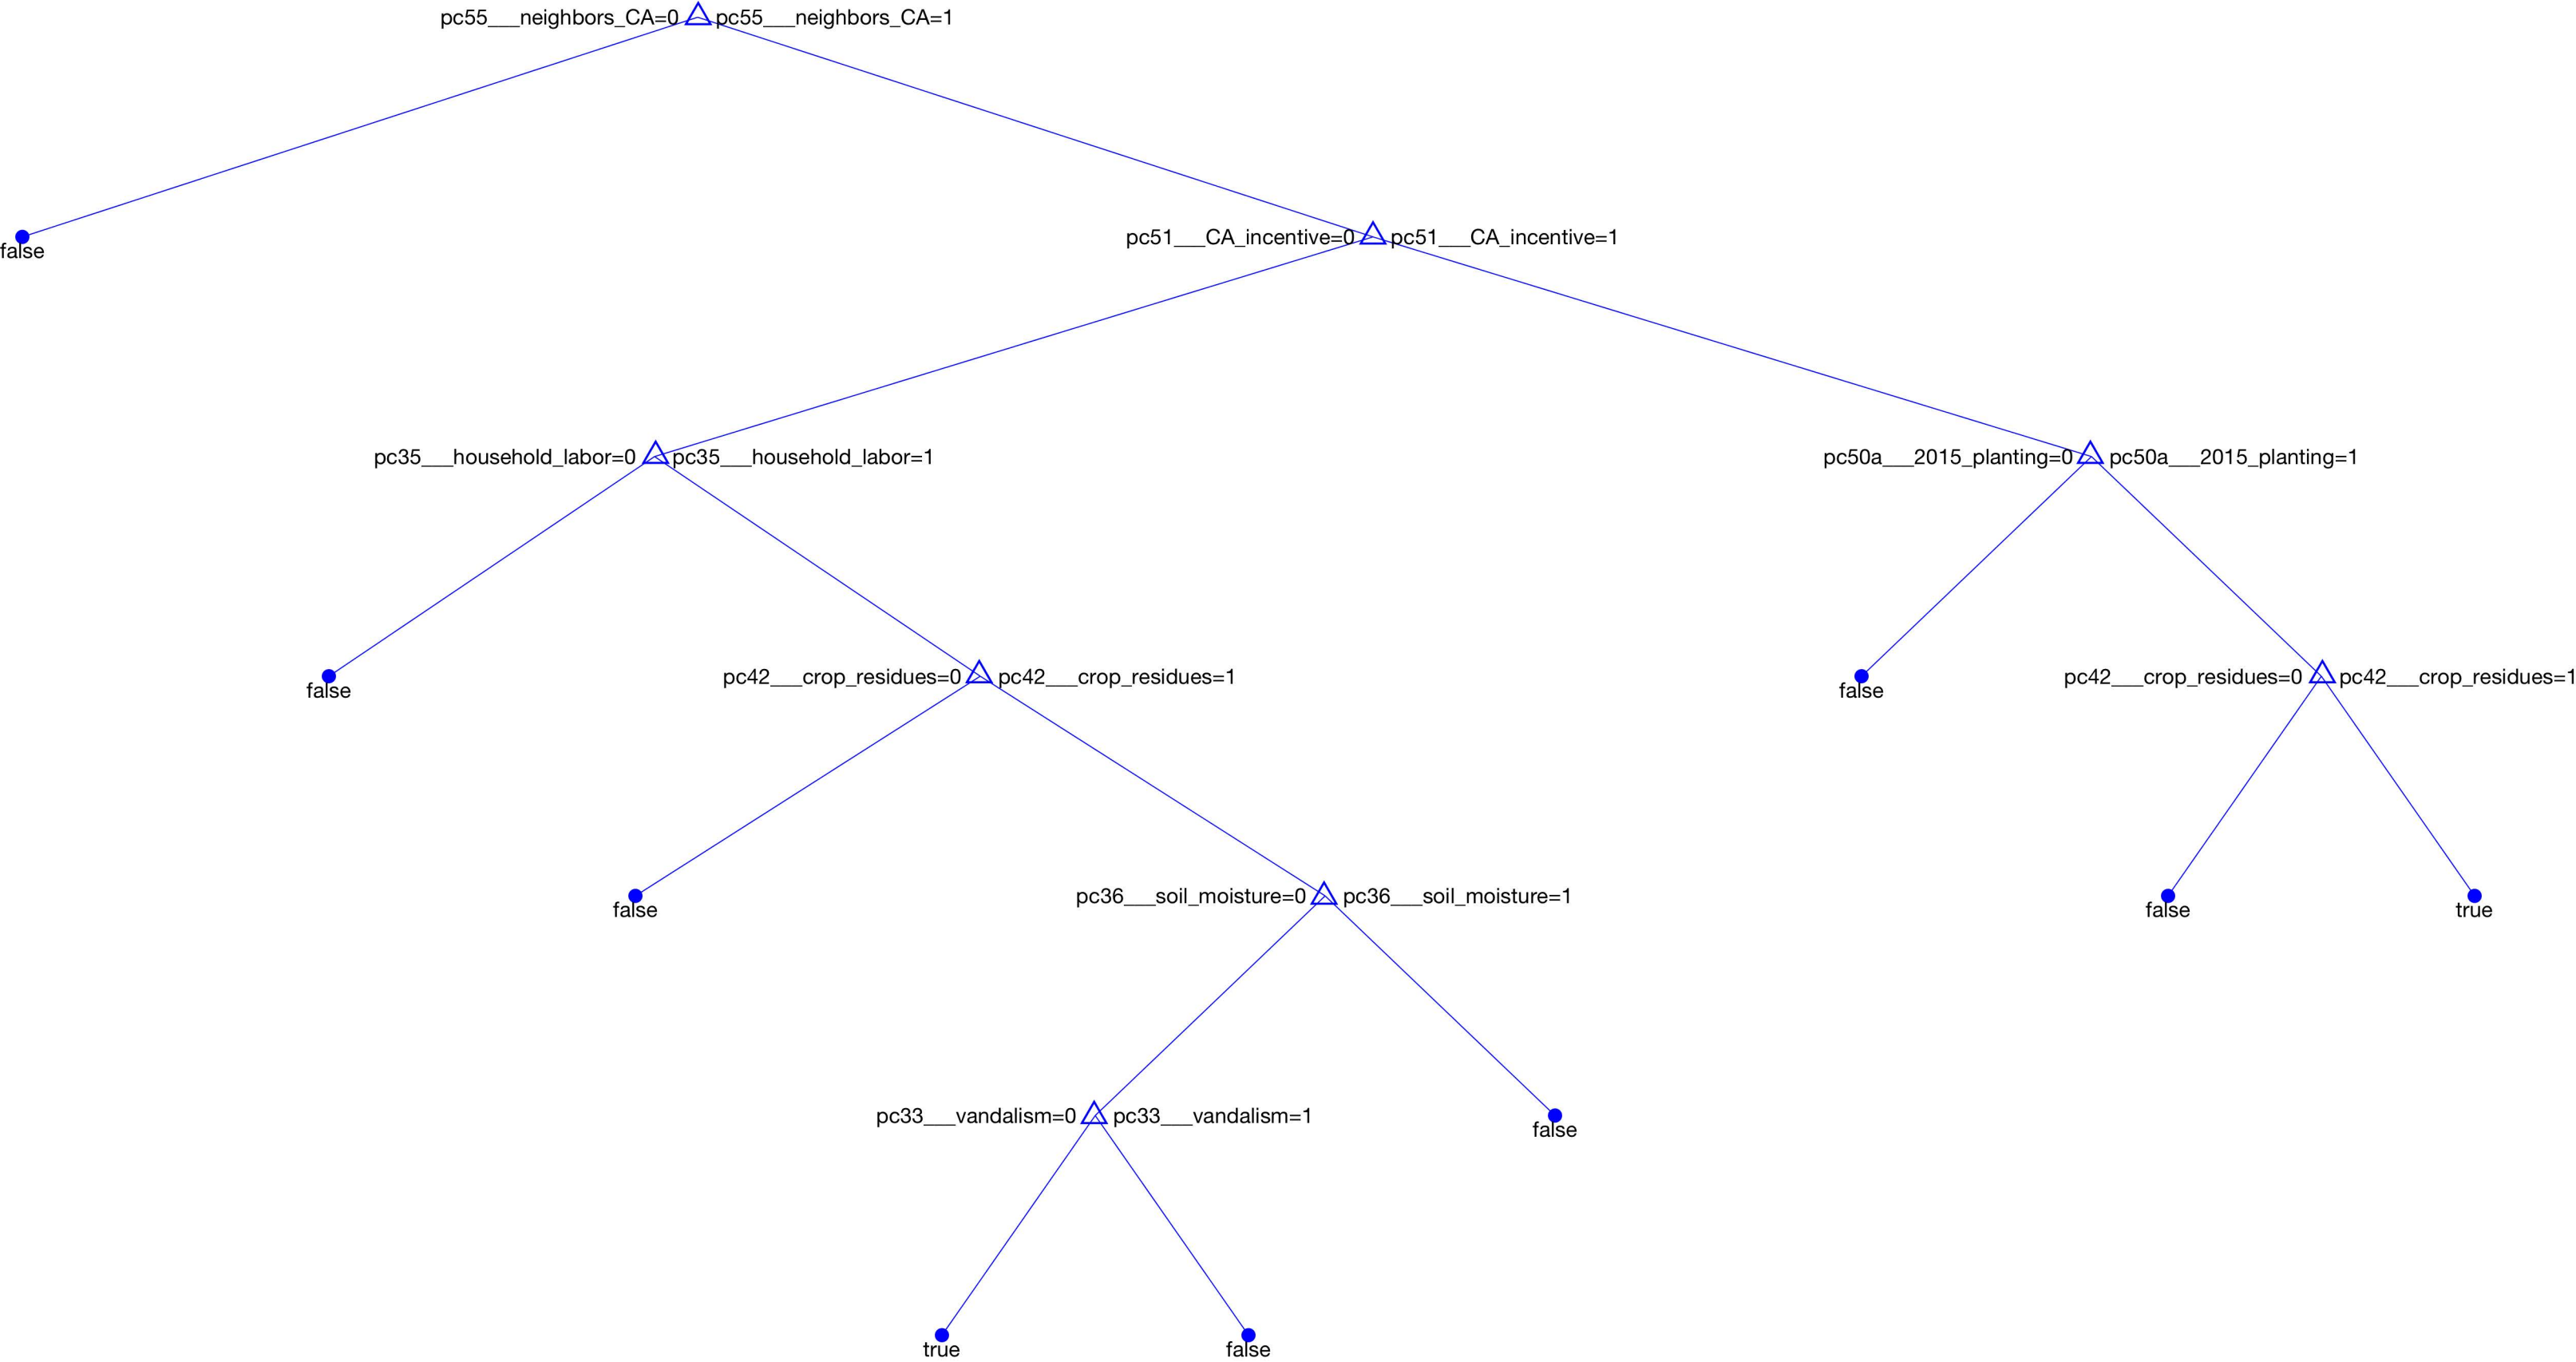

FullSample-CR

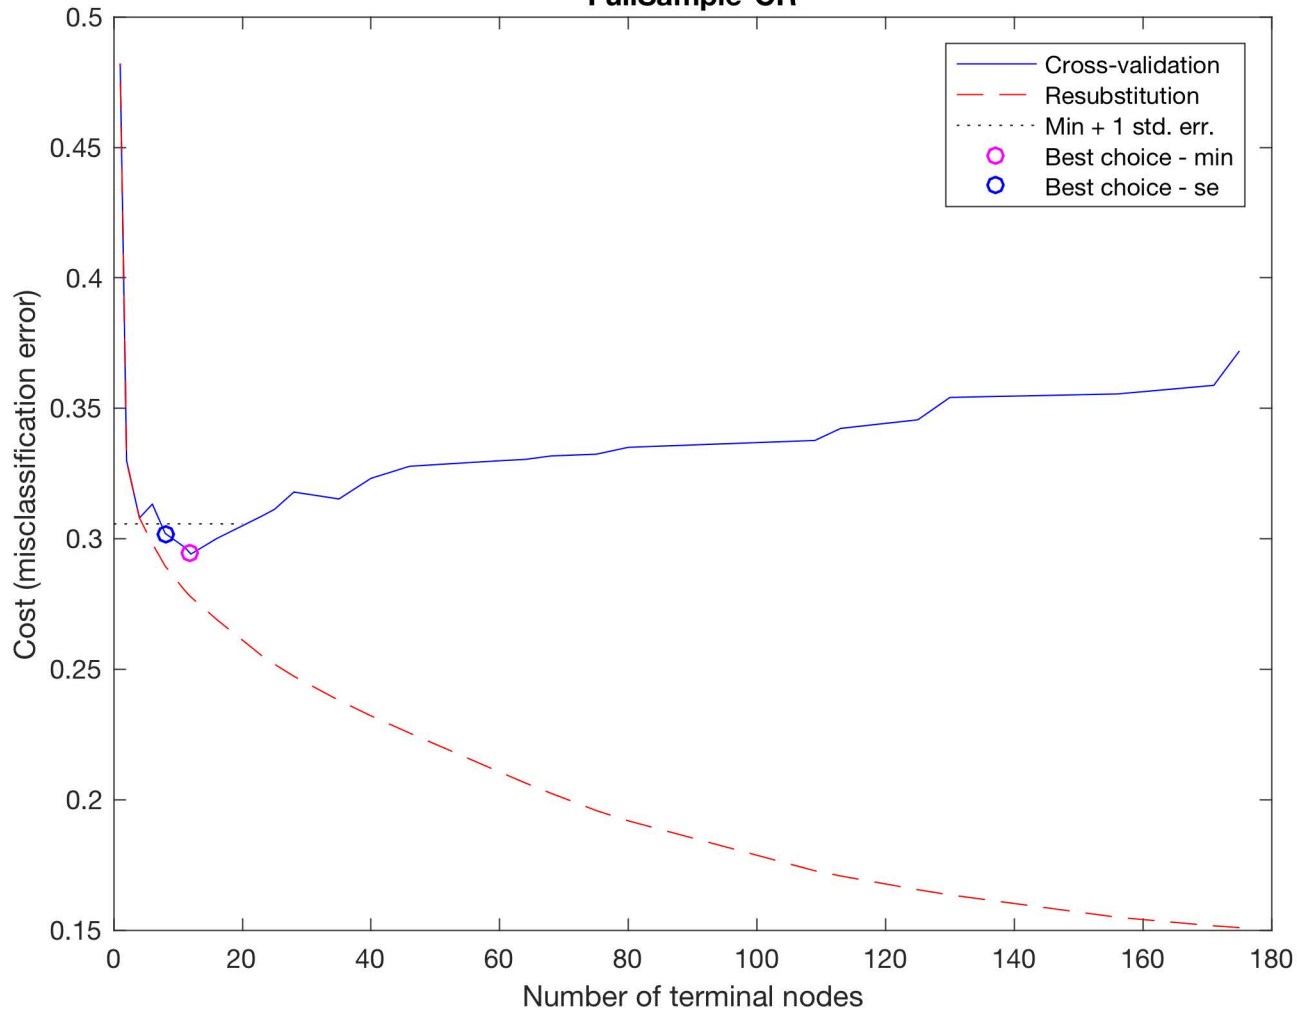

| Node | ProbFalse  | ProbTrue   | Cases |
|------|------------|------------|-------|
| 4    | 0.8044164  | 0.1955836  | 317   |
| 9    | 0.3539823  | 0.6460177  | 113   |
| 10   | 0.63157895 | 0.36842105 | 57    |
| 13   | 0.22961373 | 0.77038627 | 466   |
| 14   | 0.76859504 | 0.23140496 | 121   |
| 16   | 0.28205128 | 0.71794872 | 39    |
| 17   | 0.52564103 | 0.47435897 | 78    |
| 18   | 0.26666667 | 0.73333333 | 75    |
| 20   | 0.73170732 | 0.26829268 | 41    |
| 21   | 0.43564356 | 0.56435644 | 101   |
| 22   | 0.61666667 | 0.38333333 | 60    |
| 23   | 0.35416667 | 0.64583333 | 48    |

# FullSample-CR - MIN

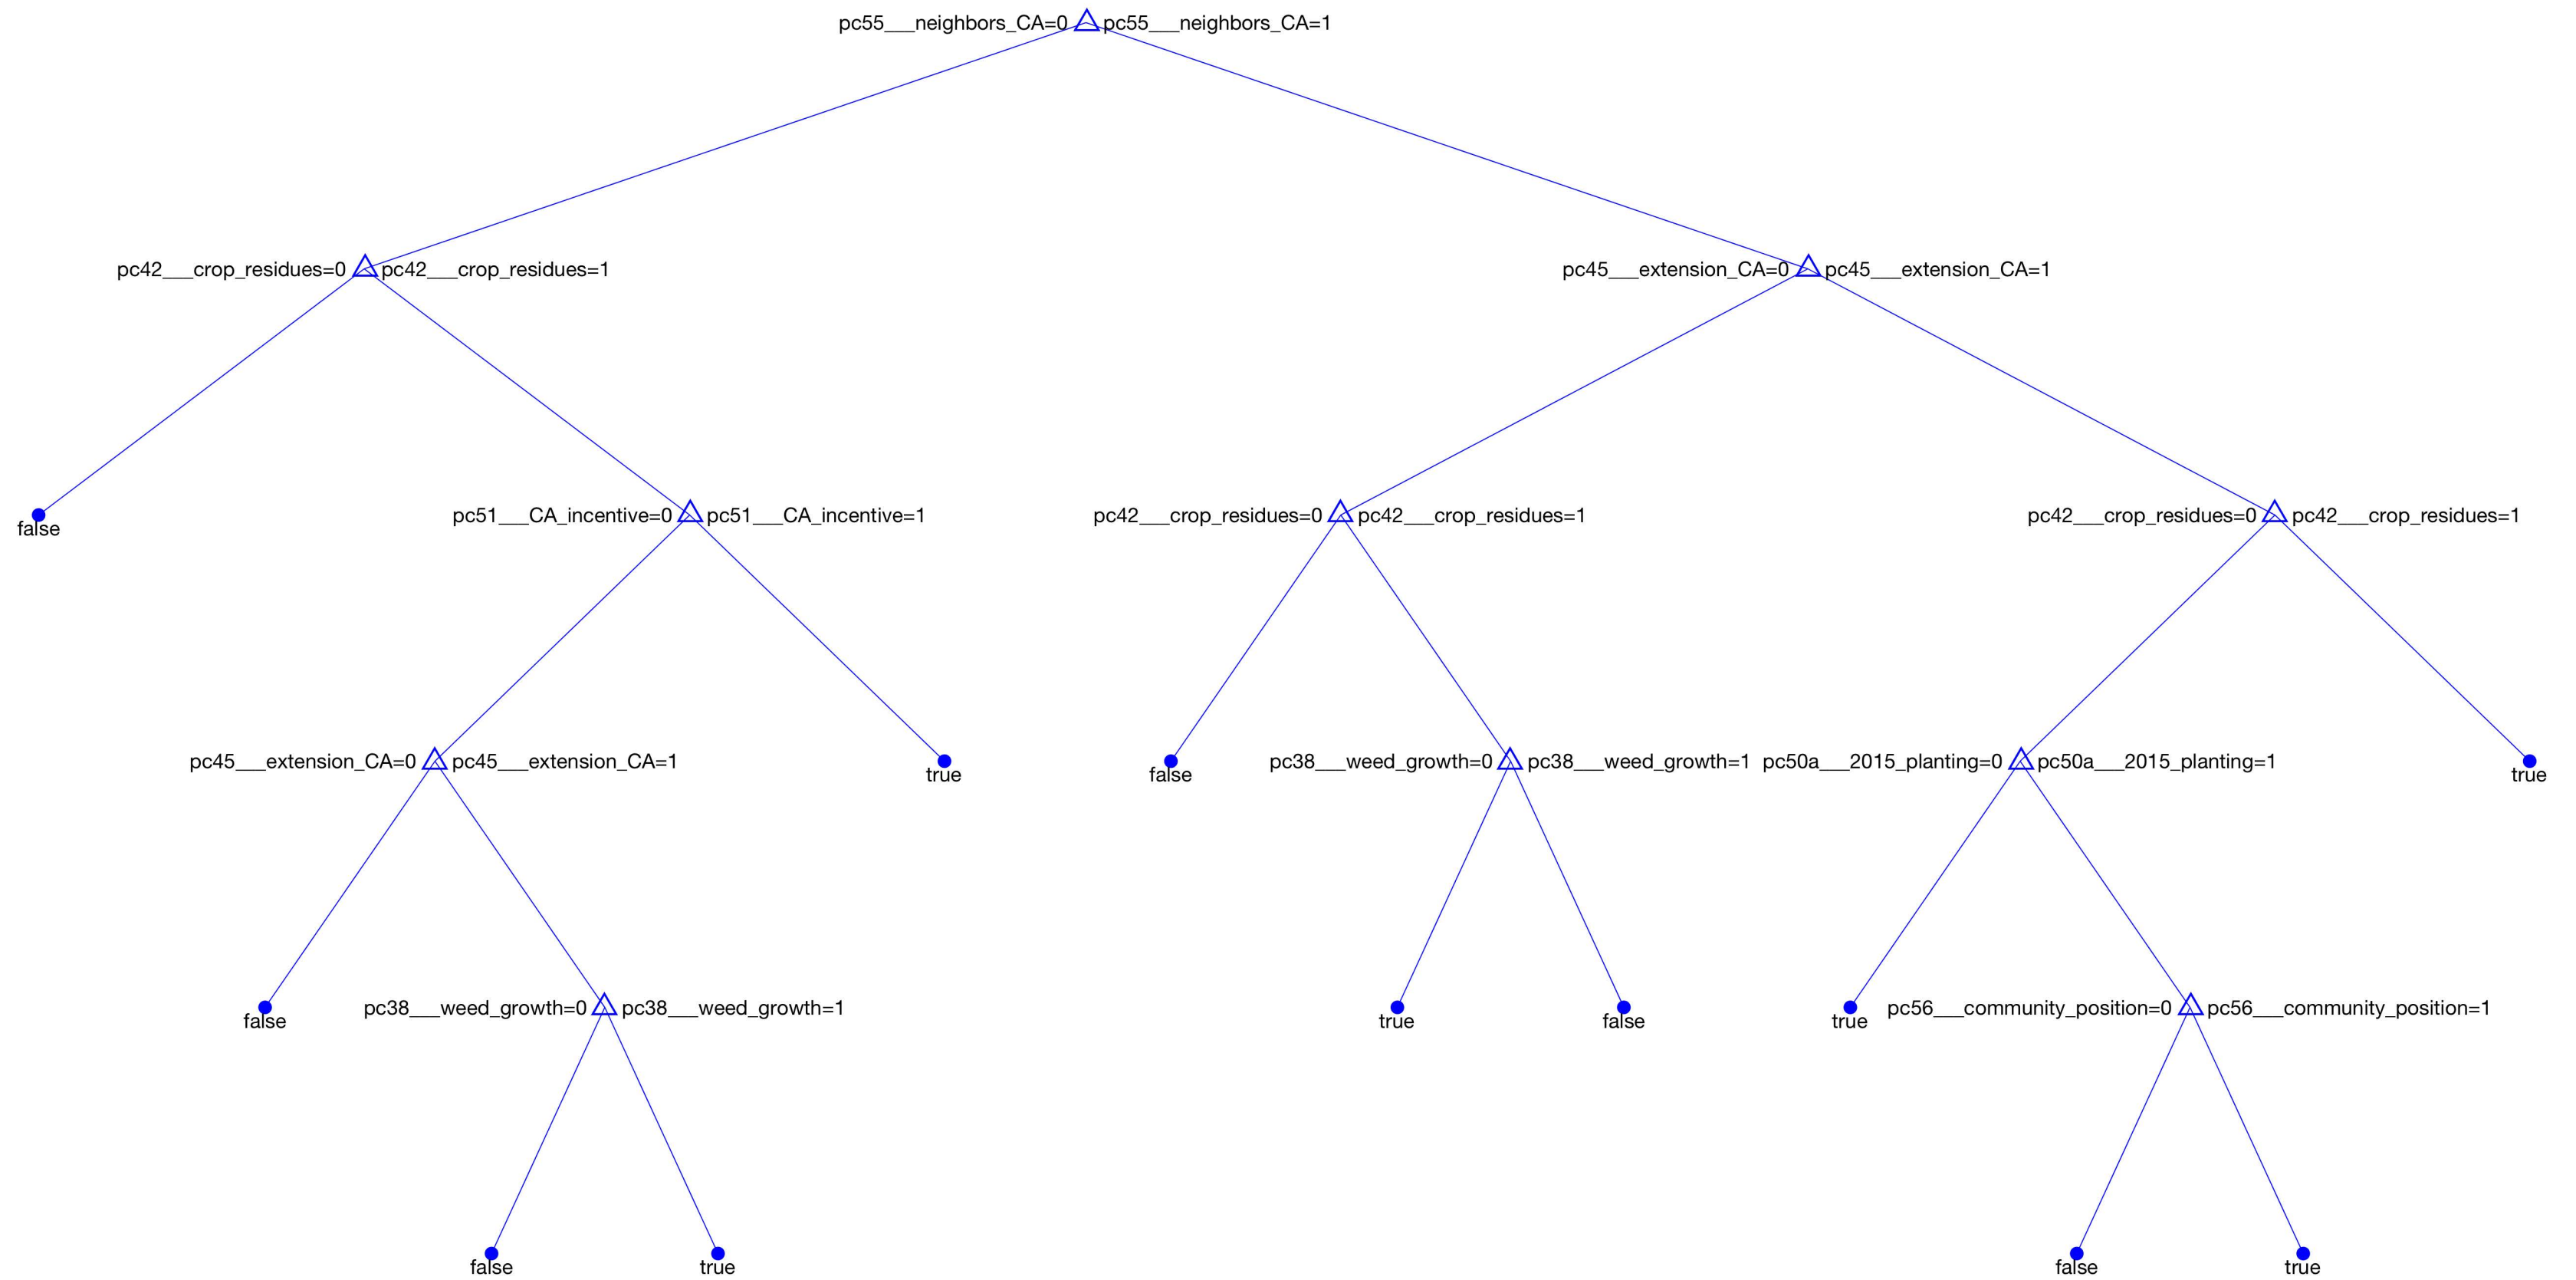

| Node | ProbFalse  | ProbTrue   | Cases |
|------|------------|------------|-------|
| 4    | 0.8044164  | 0.1955836  | 317   |
| 7    | 0.2788906  | 0.7211094  | 649   |
| 9    | 0.3539823  | 0.6460177  | 113   |
| 10   | 0.63157895 | 0.36842105 | 57    |
| 11   | 0.44444444 | 0.55555556 | 117   |
| 12   | 0.76859504 | 0.23140496 | 121   |
| 14   | 0.73170732 | 0.26829268 | 41    |
| 15   | 0.43564356 | 0.56435644 | 101   |

FullSample-CR - SE

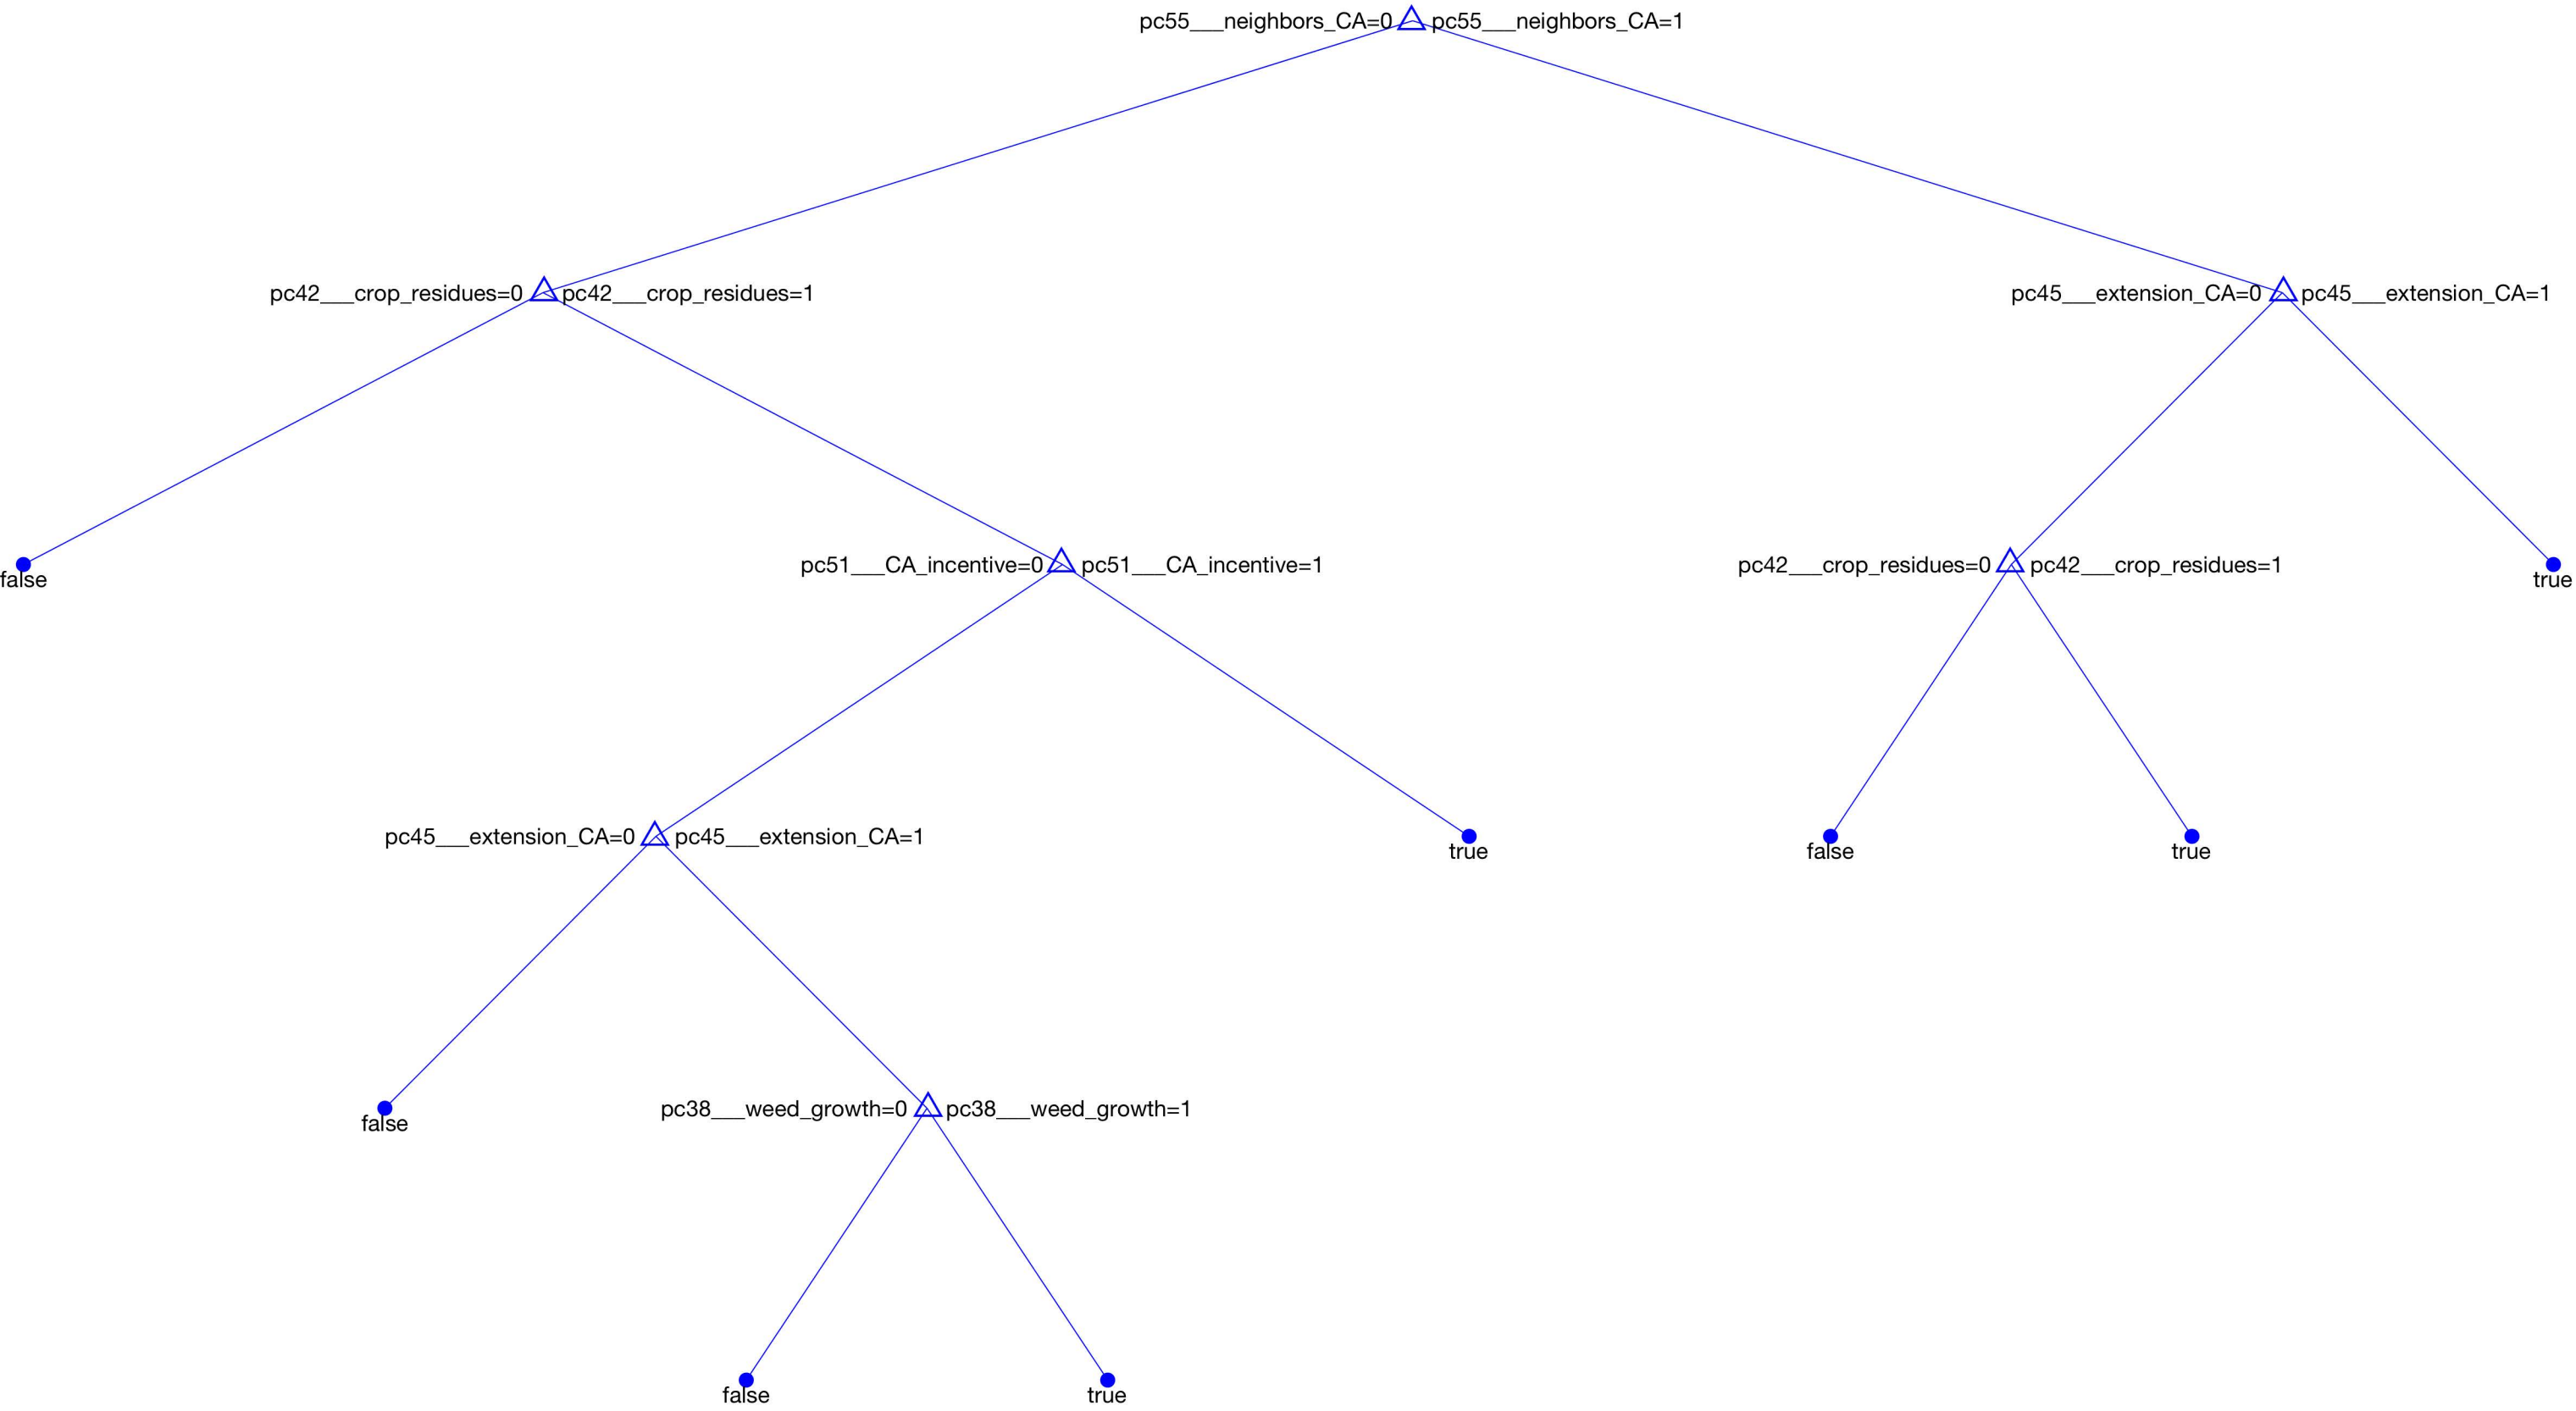

# FullSample-IC

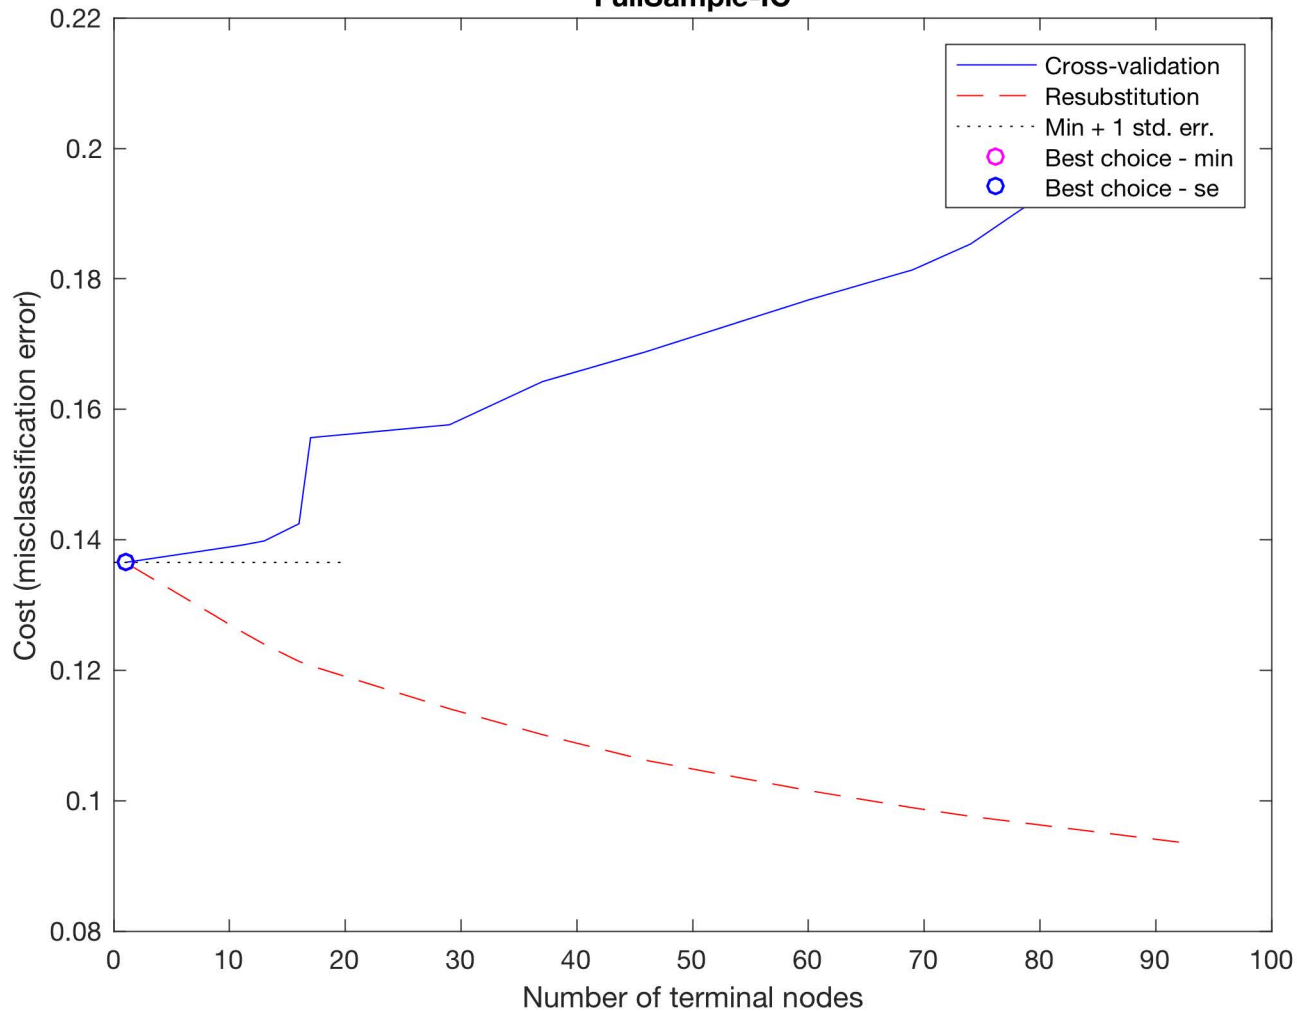



| Node | ProbFalse  | ProbTrue   | Cases |
|------|------------|------------|-------|
| 1    | 0.13654354 | 0.86345646 | 1516  |

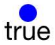

true

| Node | ProbFalse  | ProbTrue   | Cases |
|------|------------|------------|-------|
| 1    | 0.13654354 | 0.86345646 | 1516  |



true

FullSample-ZT

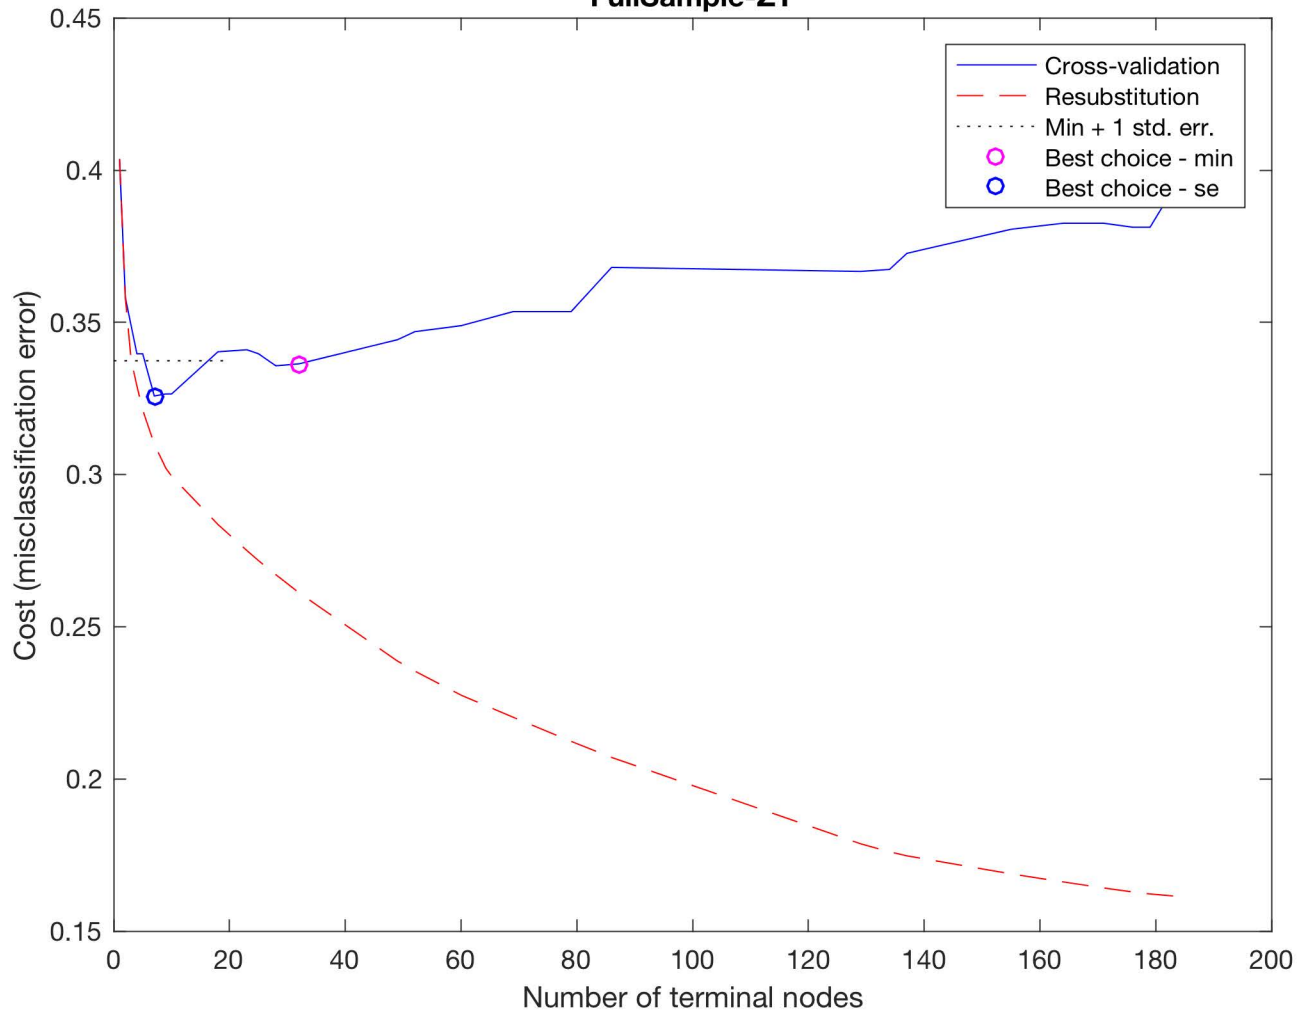

| Node | ProbFalse  | ProbTrue   | Cases |
|------|------------|------------|-------|
| 4    | 0.80038388 | 0.19961612 | 521   |
| 8    | 0.81355932 | 0.18644068 | 59    |
| 10   | 0.69148936 | 0.30851064 | 94    |
| 22   | 0.32142857 | 0.67857143 | 28    |
| 24   | 0.9        | 0.1        | 20    |
| 25   | 0.4        | 0.6        | 15    |
| 27   | 0.21052632 | 0.78947368 | 19    |
| 28   | 0.64814815 | 0.35185185 | 54    |
| 29   | 0.16666667 | 0.83333333 | 6     |
| 31   | 0.6627907  | 0.3372093  | 86    |
| 33   | 0.20833333 | 0.79166667 | 24    |
| 35   | 0.55172414 | 0.44827586 | 116   |
| 37   | 0.216      | 0.784      | 125   |
| 38   | 0.72222222 | 0.27777778 | 18    |
| 41   | 0.27272727 | 0.72727273 | 22    |
| 43   | 0          | 1          | 4     |
| 44   | 0.875      | 0.125      | 8     |
| 45   | 0.38888889 | 0.61111111 | 18    |
| 47   | 0.29906542 | 0.70093458 | 107   |
| 49   | 0.2173913  | 0.7826087  | 23    |
| 50   | 0.60869565 | 0.39130435 | 23    |
| 51   | 0.22222222 | 0.77777778 | 9     |
| 52   | 0.33333333 | 0.66666667 | 9     |
| 53   | 1          | 0          | 7     |
| 54   | 0.38095238 | 0.61904762 | 21    |
| 55   | 0.66666667 | 0.33333333 | 18    |
| 57   | 0          | 1          | 5     |
| 59   | 0.875      | 0.125      | 8     |
| 60   | 0.22222222 | 0.77777778 | 9     |
| 61   | 0.71428571 | 0.28571429 | 21    |
| 62   | 0.25       | 0.75       | 12    |
| 63   | 0.71428571 | 0.28571429 | 7     |

The diagram is a decision tree titled "FullSample-ZT - MIN". It represents a classification model with the following structure:

- Root Node:** `pc55__neighbors_CA=0` (Left branch) / `pc55__neighbors_CA=1` (Right branch)
- Level 1 (Left of Root):**
  - `pc51__CA_incentive=0` (Left branch) / `pc51__CA_incentive=1` (Right branch)
- Level 1 (Right of Root):**
  - `pc50b__2014_planting=0` (Left branch) / `pc50b__2014_planting=1` (Right branch)
- Level 2 (Left of Root):**
  - From `pc51__CA_incentive=0`: `pc42__crop_residues=0` (Left branch) / `pc42__crop_residues=1` (Right branch)
  - From `pc51__CA_incentive=1`: `pc56__community_position=0` (Left branch) / `pc56__community_position=1` (Right branch)
- Level 2 (Right of Root):**
  - From `pc50b__2014_planting=0`: `pc48__insect_pests=0` (Left branch) / `pc48__insect_pests=1` (Right branch)
  - From `pc50b__2014_planting=1`: `pc42__crop_residues=0` (Left branch) / `pc42__crop_residues=1` (Right branch)
- Level 3 (Left of Root):**
  - From `pc42__crop_residues=0`: `pc47__animal_pests=0` (Left branch) / `pc47__animal_pests=1` (Right branch)
  - From `pc42__crop_residues=1`: `pc56__community_position=0` (Left branch) / `pc56__community_position=1` (Right branch)
  - From `pc56__community_position=0`: `pc48__insect_pests=0` (Left branch) / `pc48__insect_pests=1` (Right branch)
  - From `pc56__community_position=1`: `pc50a__2015_planting=0` (Left branch) / `pc50a__2015_planting=1` (Right branch)
- Level 3 (Right of Root):**
  - From `pc48__insect_pests=0`: `pc36__soil_moisture=0` (Left branch) / `pc36__soil_moisture=1` (Right branch)
  - From `pc48__insect_pests=1`: `pc49__waterlogging=0` (Left branch) / `pc49__waterlogging=1` (Right branch)
  - From `pc42__crop_residues=0`: `pc51__CA_incentive=0` (Left branch) / `pc51__CA_incentive=1` (Right branch)
  - From `pc42__crop_residues=1`: `pc50a__2015_planting=0` (Left branch) / `pc50a__2015_planting=1` (Right branch)
- Level 4 (Left of Root):**
  - From `pc47__animal_pests=0`: `pc44__can_buy_herbicide=0` (Left branch) / `pc44__can_buy_herbicide=1` (Right branch)
  - From `pc47__animal_pests=1`: `pc56__community_position=0` (Left branch) / `pc56__community_position=1` (Right branch)
  - From `pc48__insect_pests=0`: `pc38__weed_growth=0` (Left branch) / `pc38__weed_growth=1` (Right branch)
  - From `pc48__insect_pests=1`: `pc44__can_buy_herbicide=0` (Left branch) / `pc44__can_buy_herbicide=1` (Right branch)
  - From `pc50a__2015_planting=0`: `pc34b__2015_rainfall in {1 3}` (Left branch) / `pc34b__2015_rainfall in {2 4}` (Right branch)
  - From `pc50a__2015_planting=1`: `pc36__soil_moisture=0` (Left branch) / `pc36__soil_moisture=1` (Right branch)
- Level 4 (Right of Root):**
  - From `pc51__CA_incentive=0`: `pc45__extension_CA=0` (Left branch) / `pc45__extension_CA=1` (Right branch)
  - From `pc51__CA_incentive=1`: `pc56__community_position=0` (Left branch) / `pc56__community_position=1` (Right branch)
  - From `pc34b__2015_rainfall in {1 3}`: `pc38__weed_growth=0` (Left branch) / `pc38__weed_growth=1` (Right branch)
  - From `pc34b__2015_rainfall in {2 4}`: `pc48__insect_pests=0` (Left branch) / `pc48__insect_pests=1` (Right branch)
  - From `pc36__soil_moisture=0`: `pc33__vandalism=0` (Left branch) / `pc33__vandalism=1` (Right branch)
  - From `pc36__soil_moisture=1`: `pc48__insect_pests=0` (Left branch) / `pc48__insect_pests=1` (Right branch)
- Level 5 (Left of Root):**
  - From `pc44__can_buy_herbicide=0`: `pc44__can_buy_herbicide=0` (Left branch) / `pc44__can_buy_herbicide=1` (Right branch)
  - From `pc44__can_buy_herbicide=1`: `pc56__community_position=0` (Left branch) / `pc56__community_position=1` (Right branch)
  - From `pc38__weed_growth=0`: `pc38__weed_growth=0` (Left branch) / `pc38__weed_growth=1` (Right branch)
  - From `pc38__weed_growth=1`: `pc48__insect_pests=0` (Left branch) / `pc48__insect_pests=1` (Right branch)
  - From `pc34b__2015_rainfall in {1 3}`: `pc38__weed_growth=0` (Left branch) / `pc38__weed_growth=1` (Right branch)
  - From `pc34b__2015_rainfall in {2 4}`: `pc48__insect_pests=0` (Left branch) / `pc48__insect_pests=1` (Right branch)
- Level 5 (Right of Root):**
  - From `pc45__extension_CA=0`: `pc45__extension_CA=0` (Left branch) / `pc45__extension_CA=1` (Right branch)
  - From `pc45__extension_CA=1`: `pc56__community_position=0` (Left branch) / `pc56__community_position=1` (Right branch)
  - From `pc33__vandalism=0`: `pc33__vandalism=0` (Left branch) / `pc33__vandalism=1` (Right branch)
  - From `pc33__vandalism=1`: `pc48__insect_pests=0` (Left branch) / `pc48__insect_pests=1` (Right branch)
  - From `pc48__insect_pests=0`: `pc48__insect_pests=0` (Left branch) / `pc48__insect_pests=1` (Right branch)
  - From `pc48__insect_pests=1`: `pc48__insect_pests=0` (Left branch) / `pc48__insect_pests=1` (Right branch)
- Level 6 (Left of Root):**
  - From `pc44__can_buy_herbicide=0`: `pc44__can_buy_herbicide=0` (Left branch) / `pc44__can_buy_herbicide=1` (Right branch)
  - From `pc44__can_buy_herbicide=1`: `pc56__community_position=0` (Left branch) / `pc56__community_position=1` (Right branch)
  - From `pc38__weed_growth=0`: `pc38__weed_growth=0` (Left branch) / `pc38__weed_growth=1` (Right branch)
  - From `pc38__weed_growth=1`: `pc48__insect_pests=0` (Left branch) / `pc48__insect_pests=1` (Right branch)
  - From `pc34b__2015_rainfall in {1 3}`: `pc38__weed_growth=0` (Left branch) / `pc38__weed_growth=1` (Right branch)
  - From `pc34b__2015_rainfall in {2 4}`: `pc48__insect_pests=0` (Left branch) / `pc48__insect_pests=1` (Right branch)
- Level 6 (Right of Root):**
  - From `pc45__extension_CA=0`: `pc45__extension_CA=0` (Left branch) / `pc45__extension_CA=1` (Right branch)
  - From `pc45__extension_CA=1`: `pc56__community_position=0` (Left branch) / `pc56__community_position=1` (Right branch)
  - From `pc33__vandalism=0`: `pc33__vandalism=0` (Left branch) / `pc33__vandalism=1` (Right branch)
  - From `pc33__vandalism=1`: `pc48__insect_pests=0` (Left branch) / `pc48__insect_pests=1` (Right branch)
  - From `pc48__insect_pests=0`: `pc48__insect_pests=0` (Left branch) / `pc48__insect_pests=1` (Right branch)
  - From `pc48__insect_pests=1`: `pc48__insect_pests=0` (Left branch) / `pc48__insect_pests=1` (Right branch)

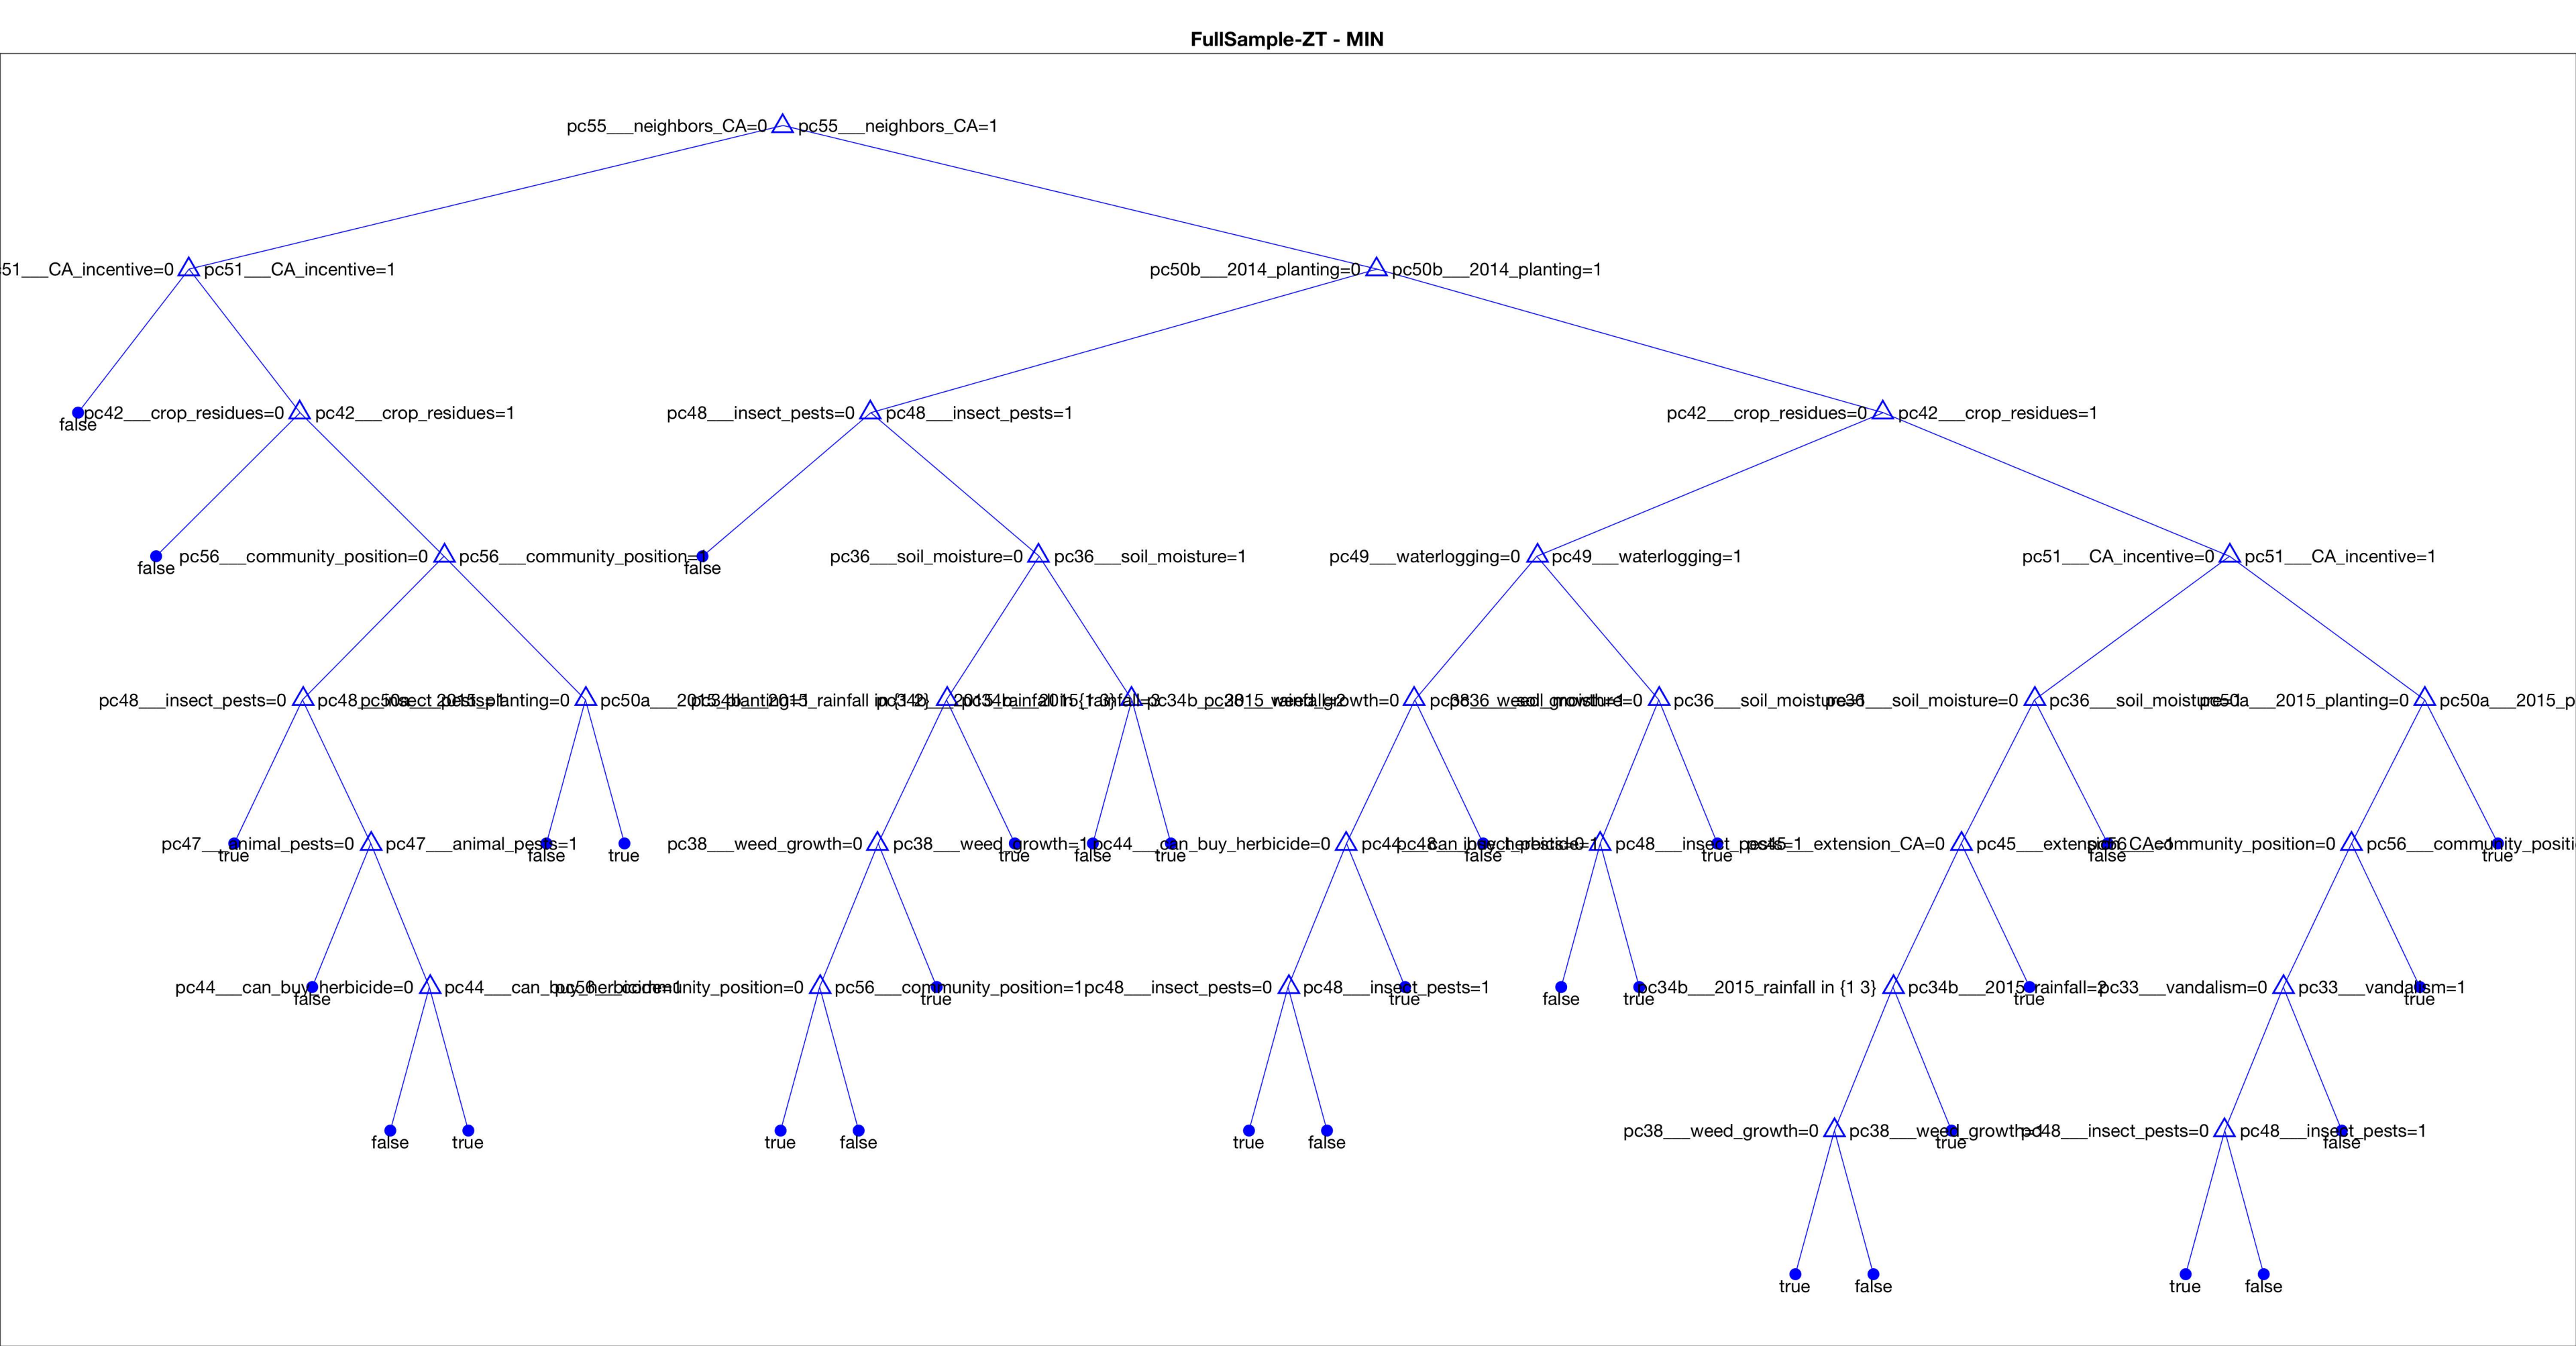

| Node | ProbFalse  | ProbTrue   | Cases |
|------|------------|------------|-------|
| 2    | 0.76046176 | 0.23953824 | 693   |
| 6    | 0.69148936 | 0.30851064 | 94    |
| 9    | 0.36951501 | 0.63048499 | 433   |
| 10   | 0.35087719 | 0.64912281 | 57    |
| 11   | 0.6        | 0.4        | 60    |
| 12   | 0.59689922 | 0.40310078 | 129   |
| 13   | 0.38       | 0.62       | 50    |



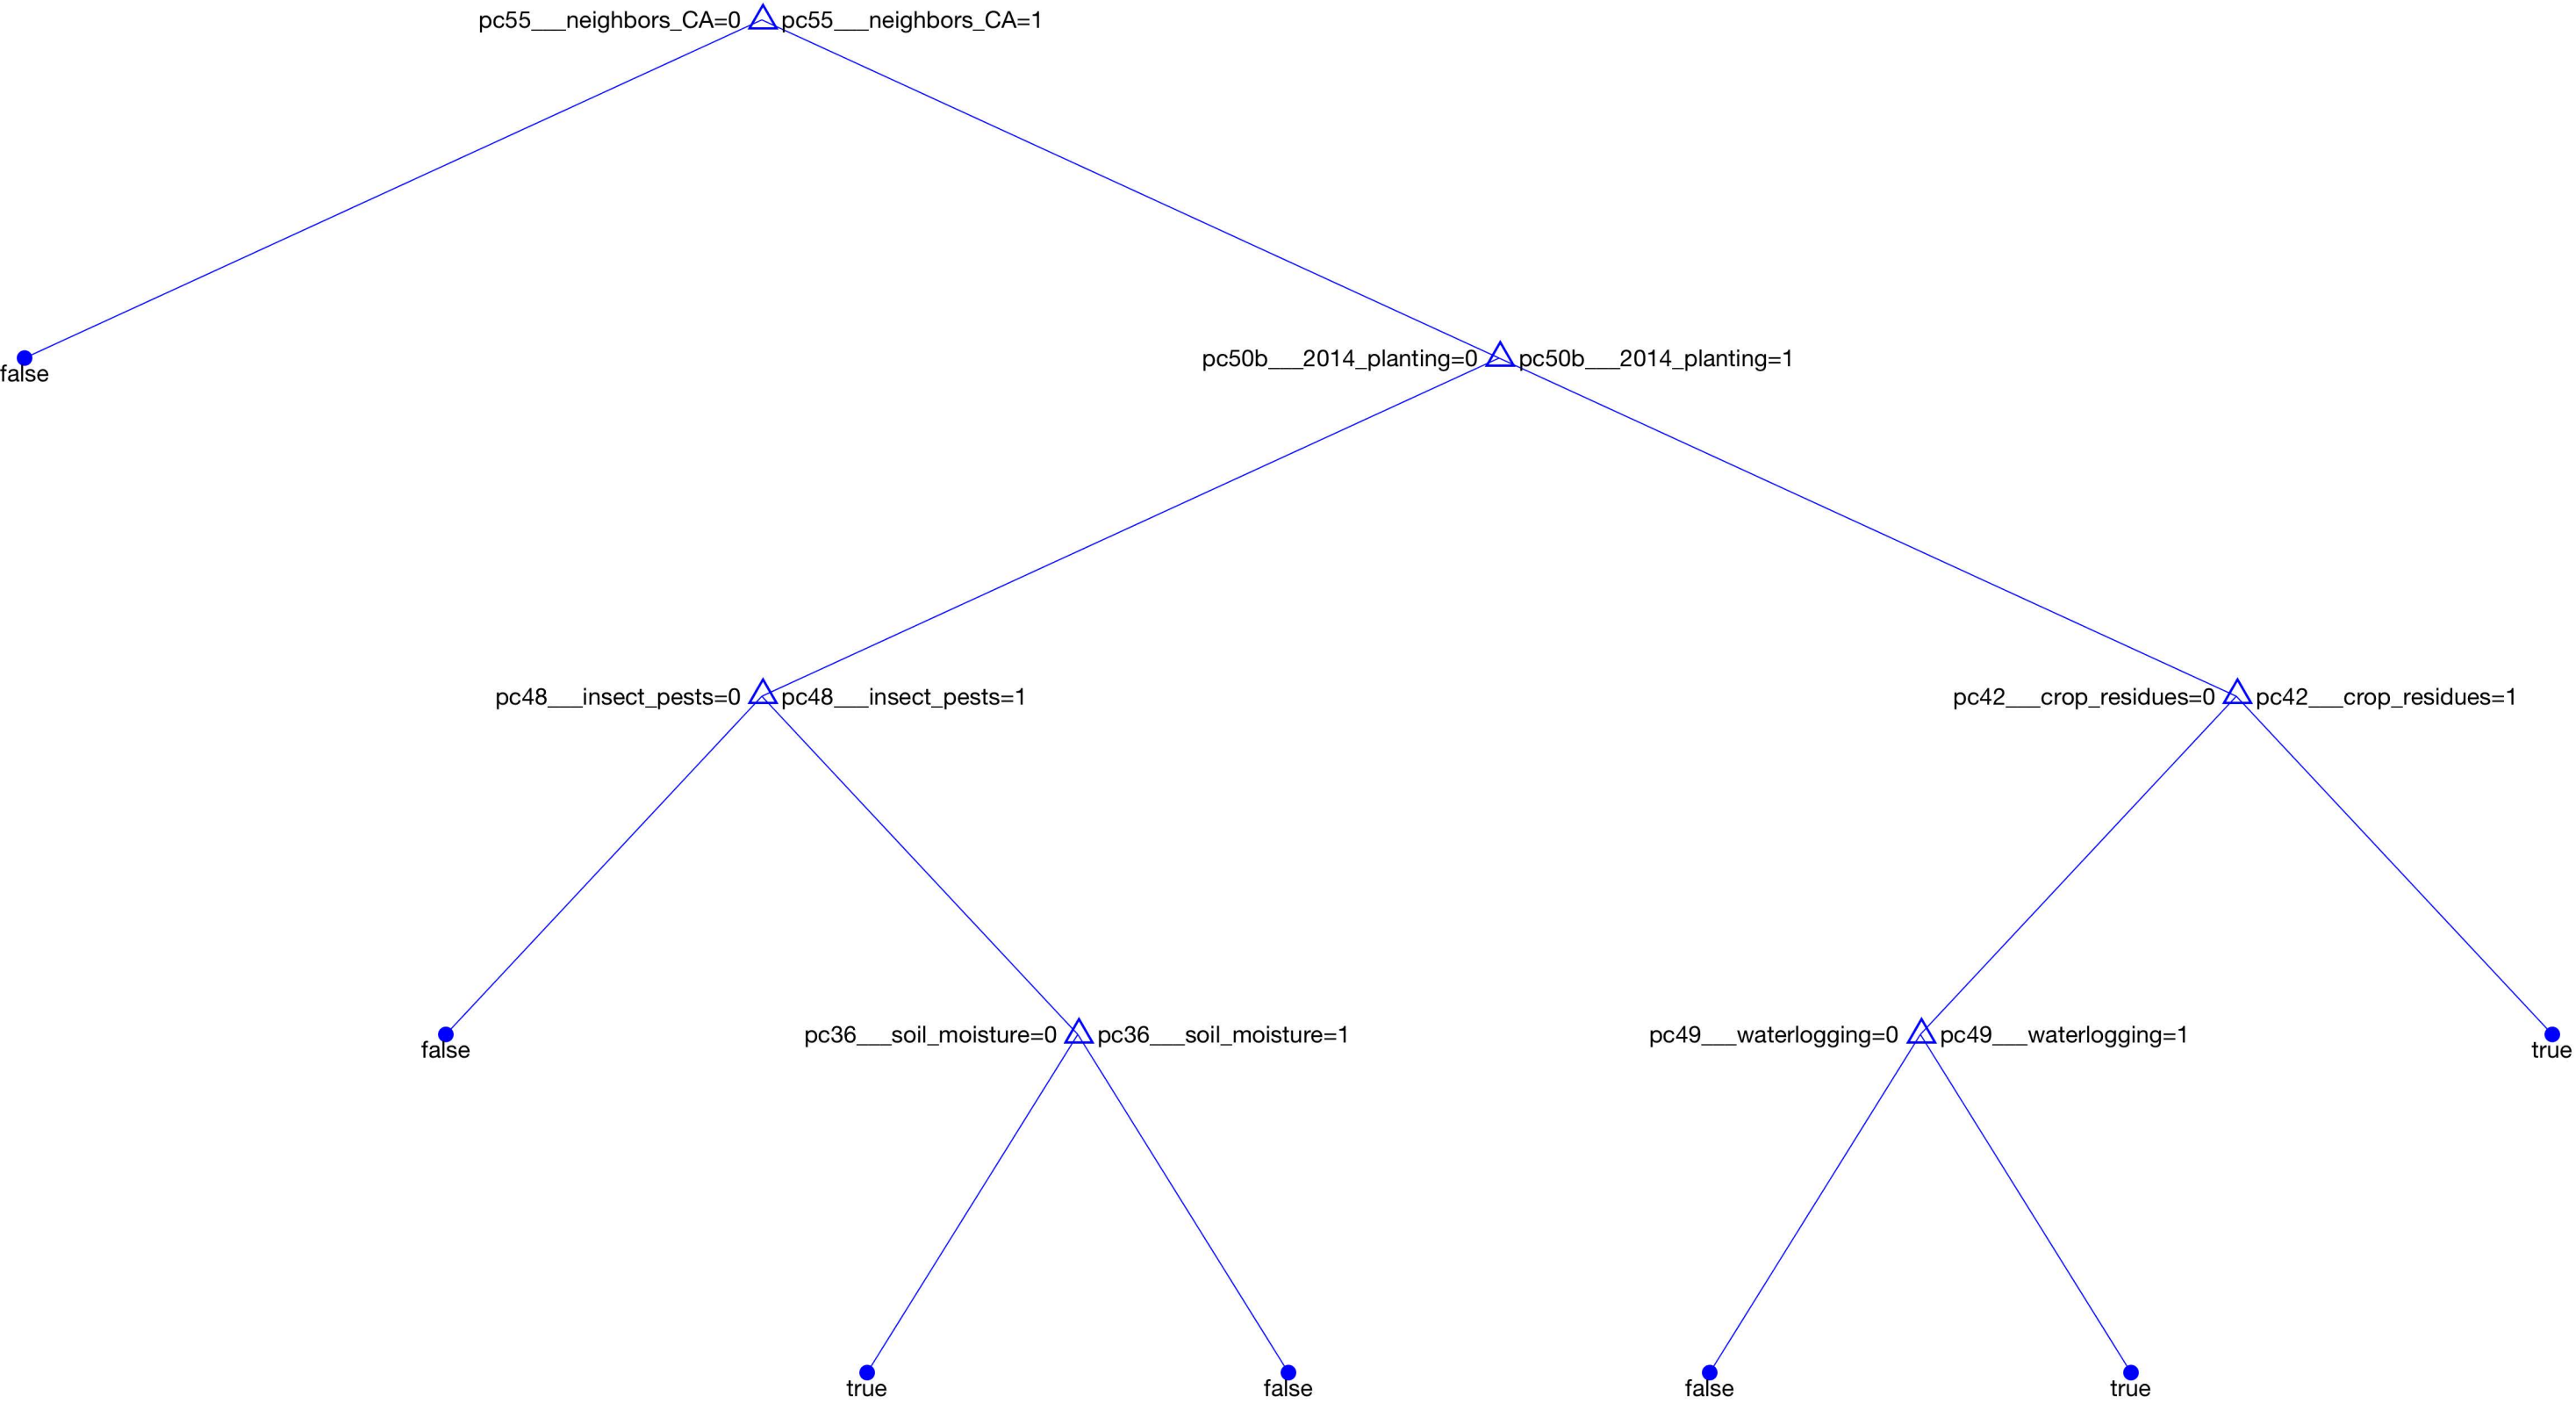

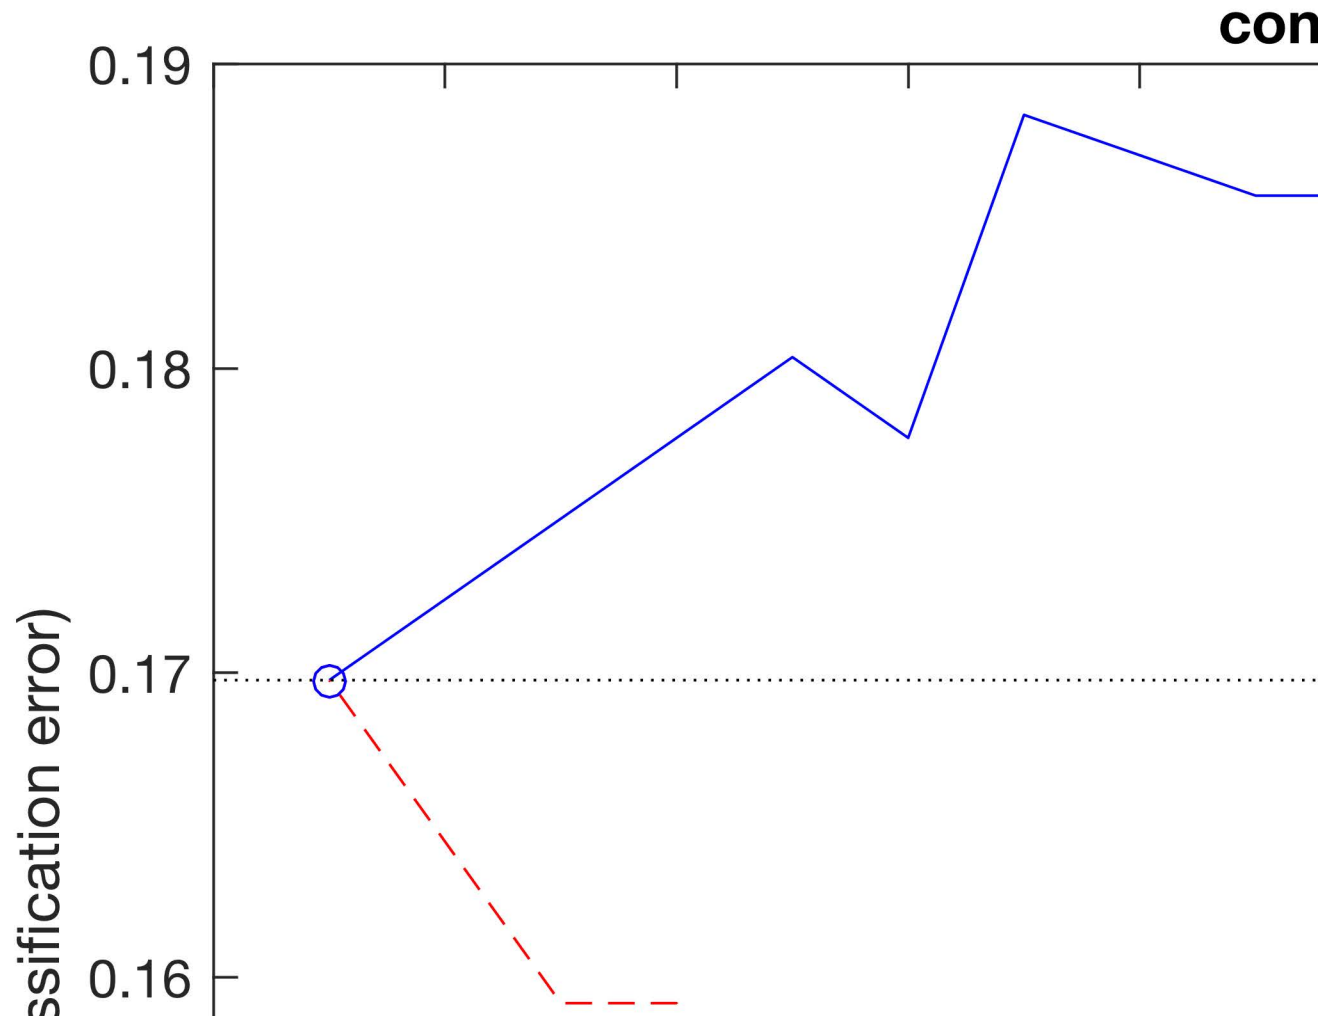

| Node | ProbFalse  | ProbTrue   | Cases |
|------|------------|------------|-------|
| 1    | 0.83023873 | 0.16976127 | 377   |



| Node | ProbFalse  | ProbTrue   | Cases |
|------|------------|------------|-------|
| 1    | 0.83023873 | 0.16976127 | 377   |



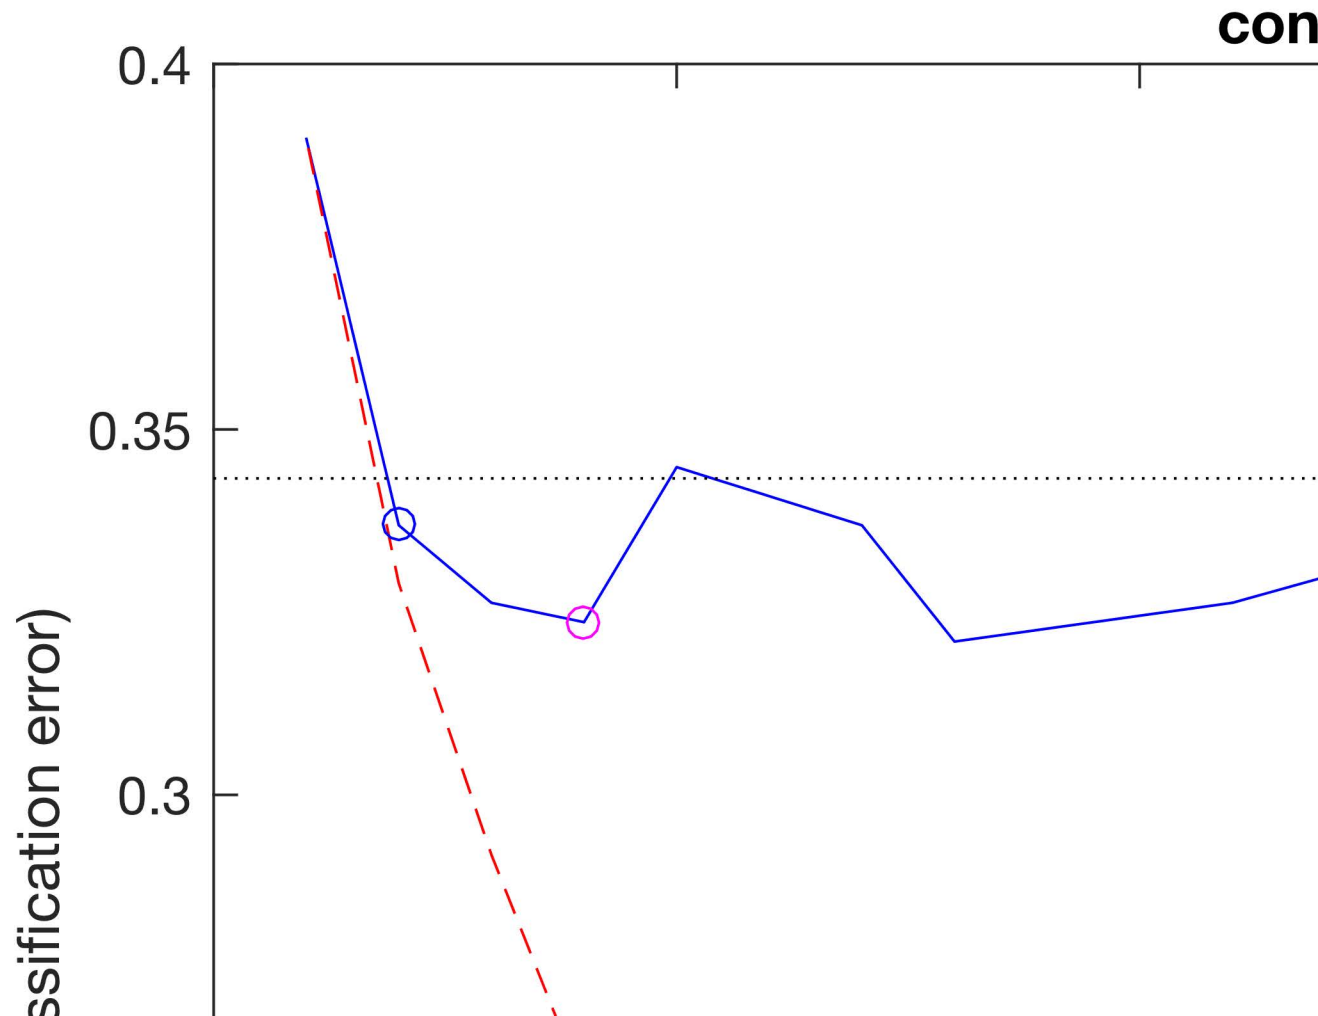

| Node | ProbFalse  | ProbTrue   | Cases |
|------|------------|------------|-------|
| 2    | 0.83125    | 0.16875    | 160   |
| 5    | 0.24657534 | 0.75342466 | 73    |
| 6    | 0.72413793 | 0.27586207 | 58    |
| 7    | 0.43023256 | 0.56976744 | 86    |



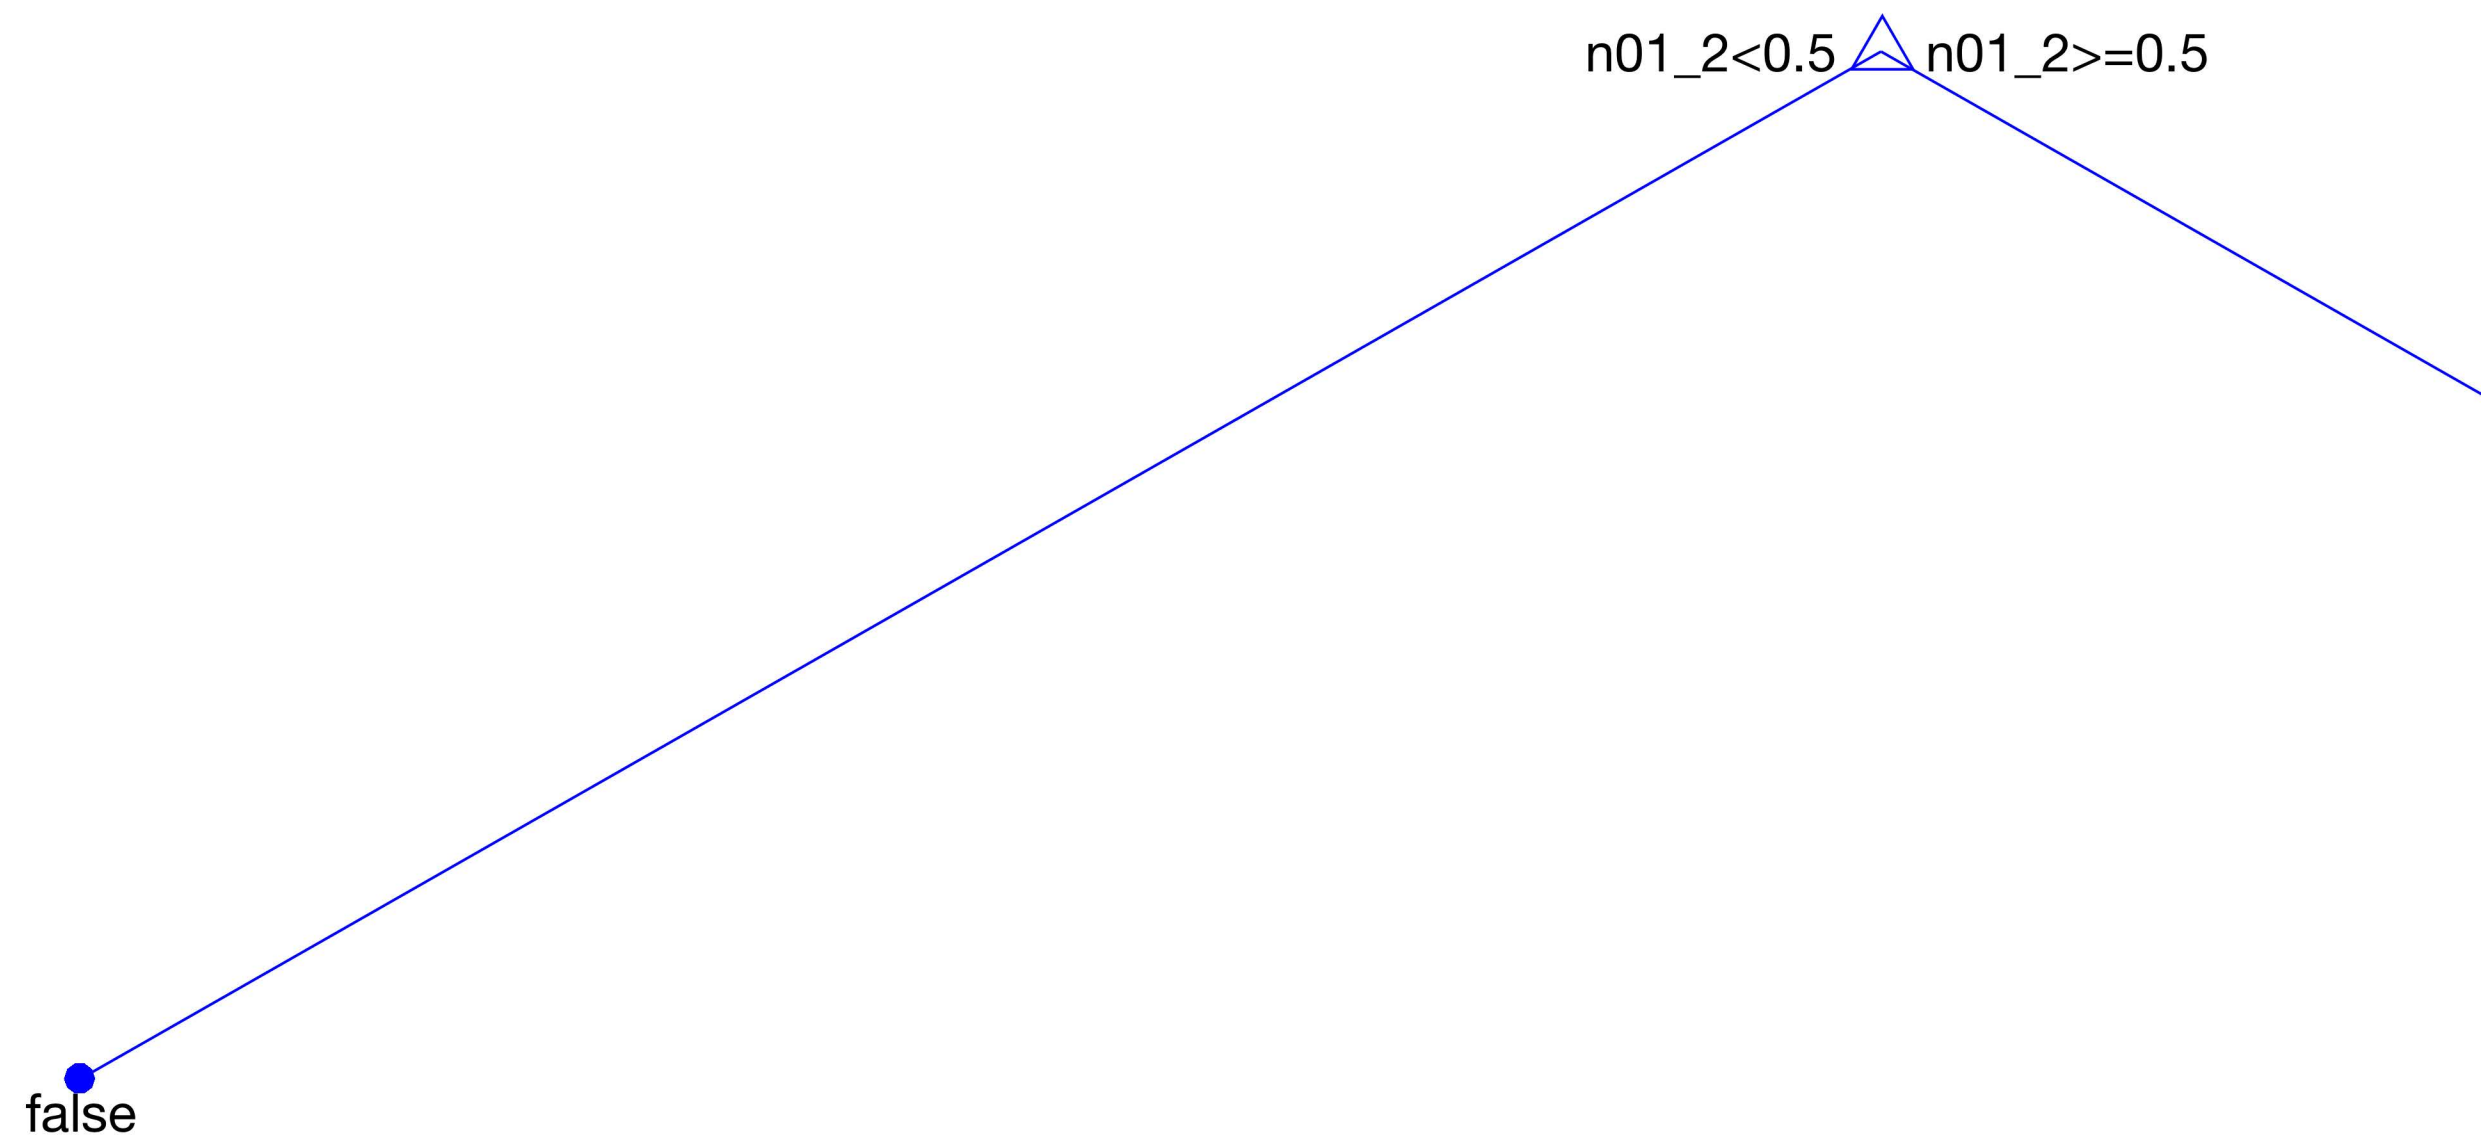

| Node | ProbFalse  | ProbTrue   | Cases |
|------|------------|------------|-------|
| 2    | 0.83125    | 0.16875    | 160   |
| 3    | 0.44700461 | 0.55299539 | 217   |

control-

n01\_2<0.5

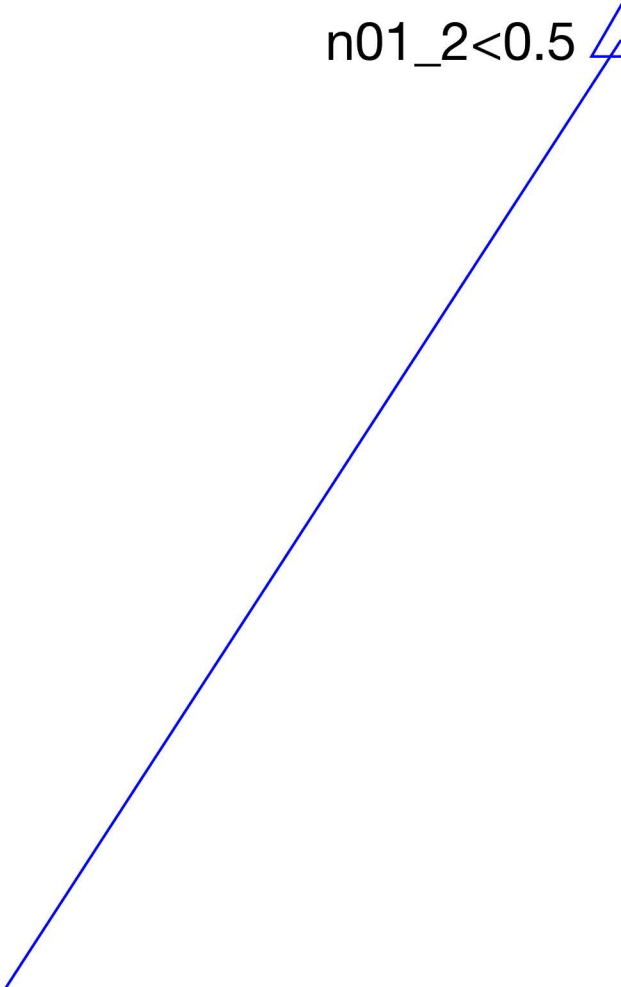

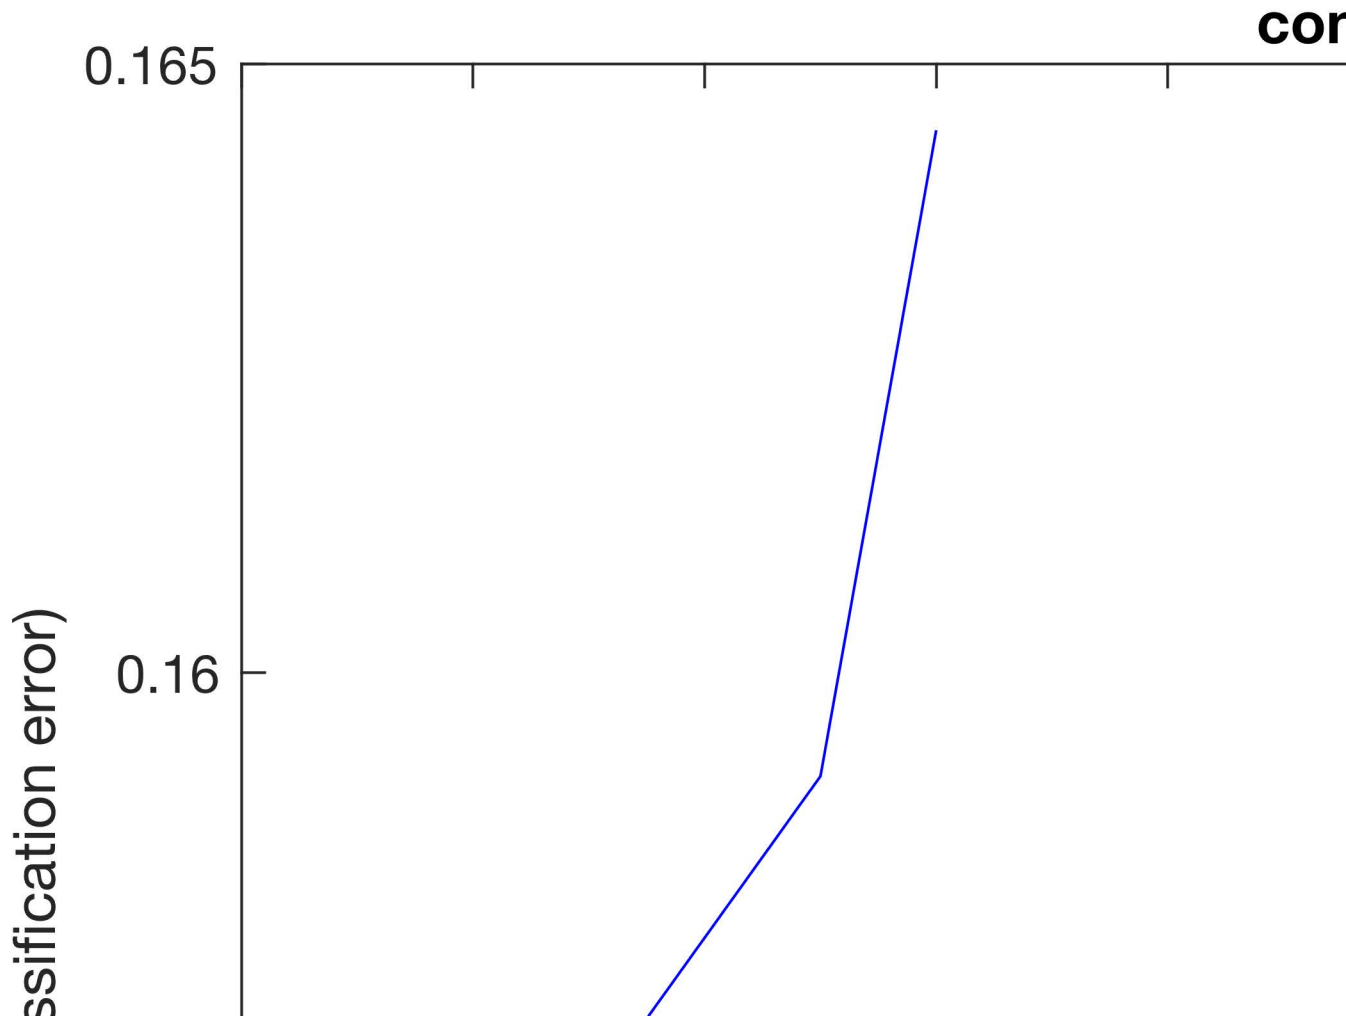

| Node | ProbFalse  | ProbTrue   | Cases |
|------|------------|------------|-------|
| 1    | 0.15649867 | 0.84350133 | 377   |



| Node | ProbFalse  | ProbTrue   | Cases |
|------|------------|------------|-------|
| 1    | 0.15649867 | 0.84350133 | 377   |





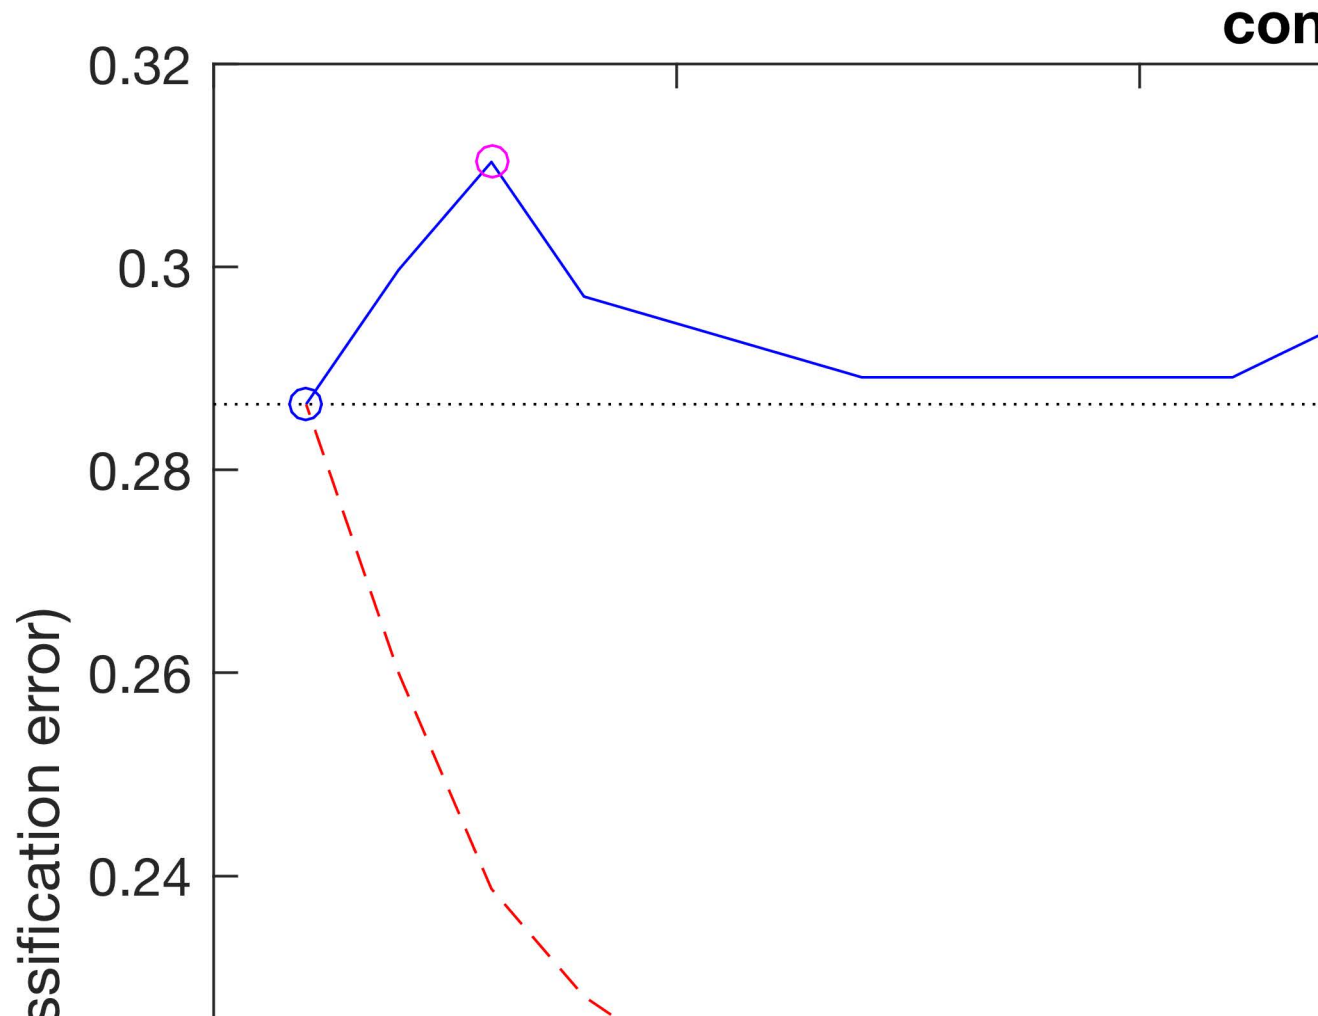

| Node | ProbFalse  | ProbTrue   | Cases |
|------|------------|------------|-------|
| 2    | 0.79180887 | 0.20819113 | 293   |
| 4    | 0.36764706 | 0.63235294 | 68    |
| 5    | 0.75       | 0.25       | 16    |

$n_{10} < 1.5$   $n_{10} \geq 1.5$

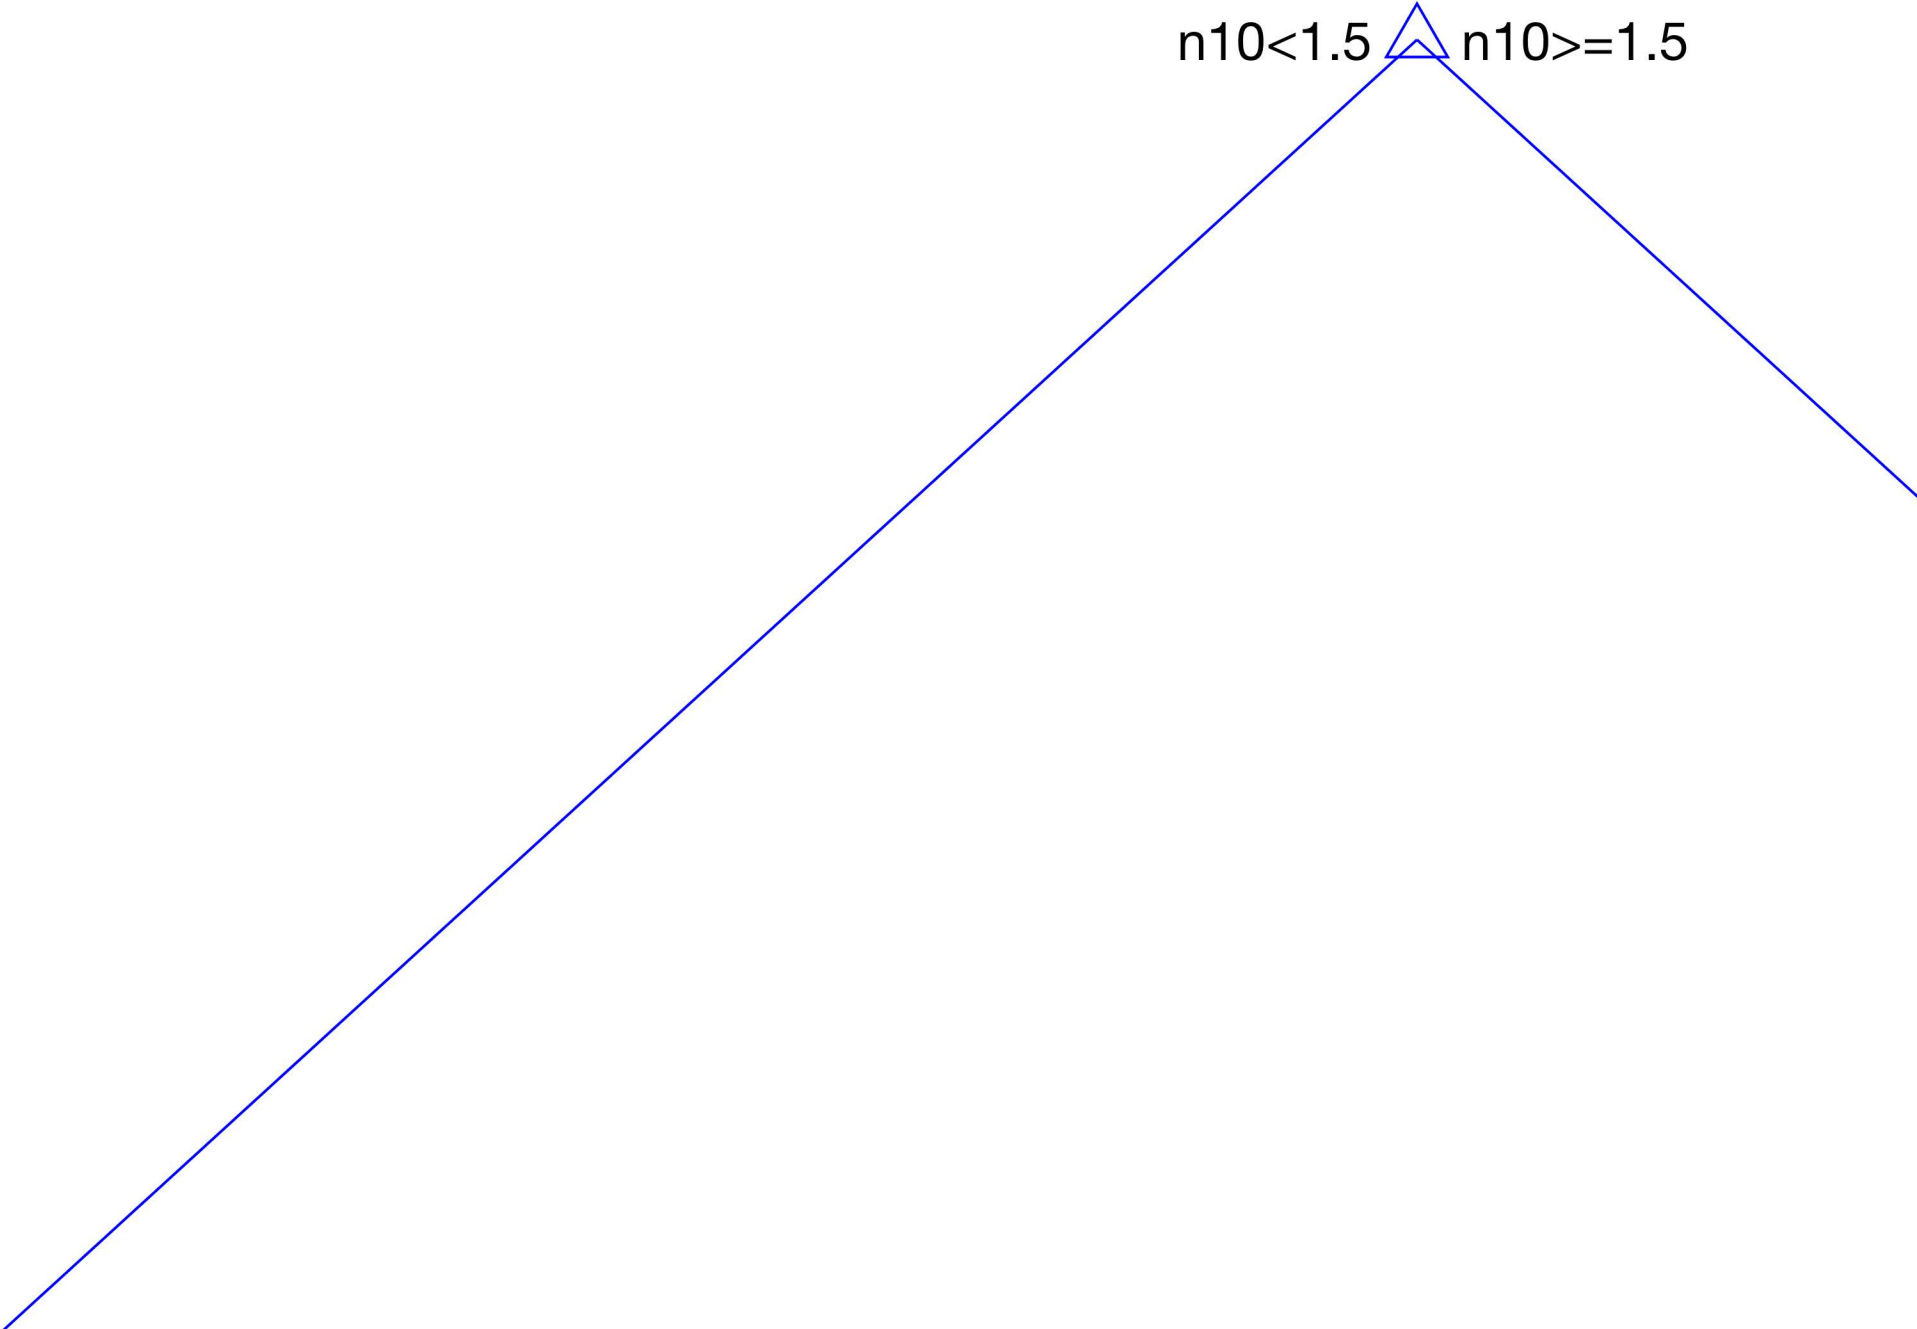

| Node | ProbFalse  | ProbTrue   | Cases |
|------|------------|------------|-------|
| 1    | 0.71352785 | 0.28647215 | 377   |



# AP-CA

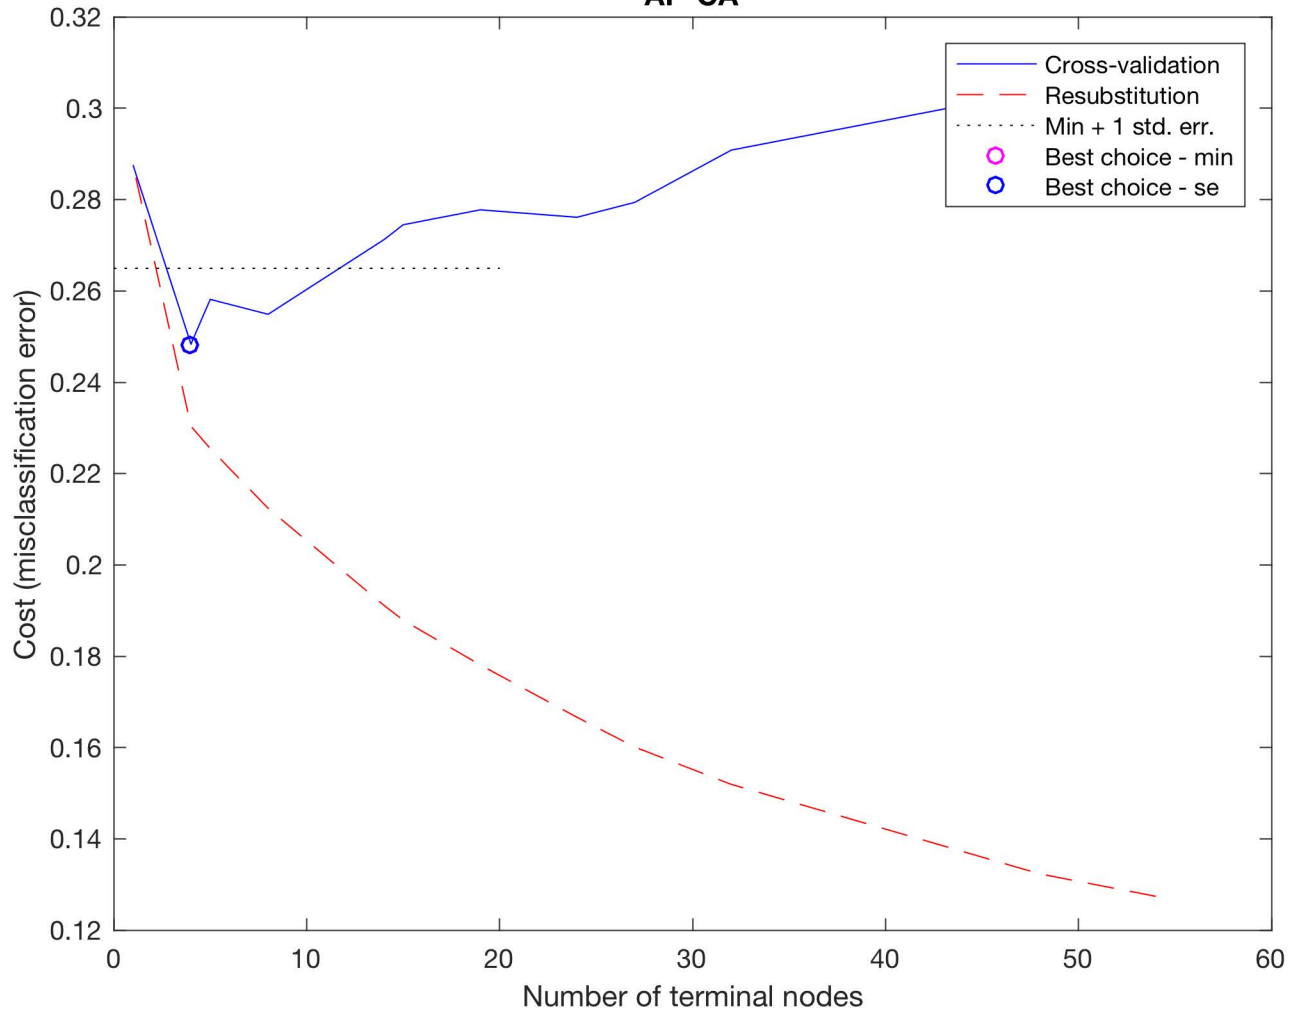

| Node | ProbFalse  | ProbTrue   | Cases |
|------|------------|------------|-------|
| 2    | 0.89891697 | 0.10108303 | 277   |
| 4    | 0.76923077 | 0.23076923 | 78    |
| 6    | 0.70512821 | 0.29487179 | 78    |
| 7    | 0.40223464 | 0.59776536 | 179   |

AP-CA - MIN

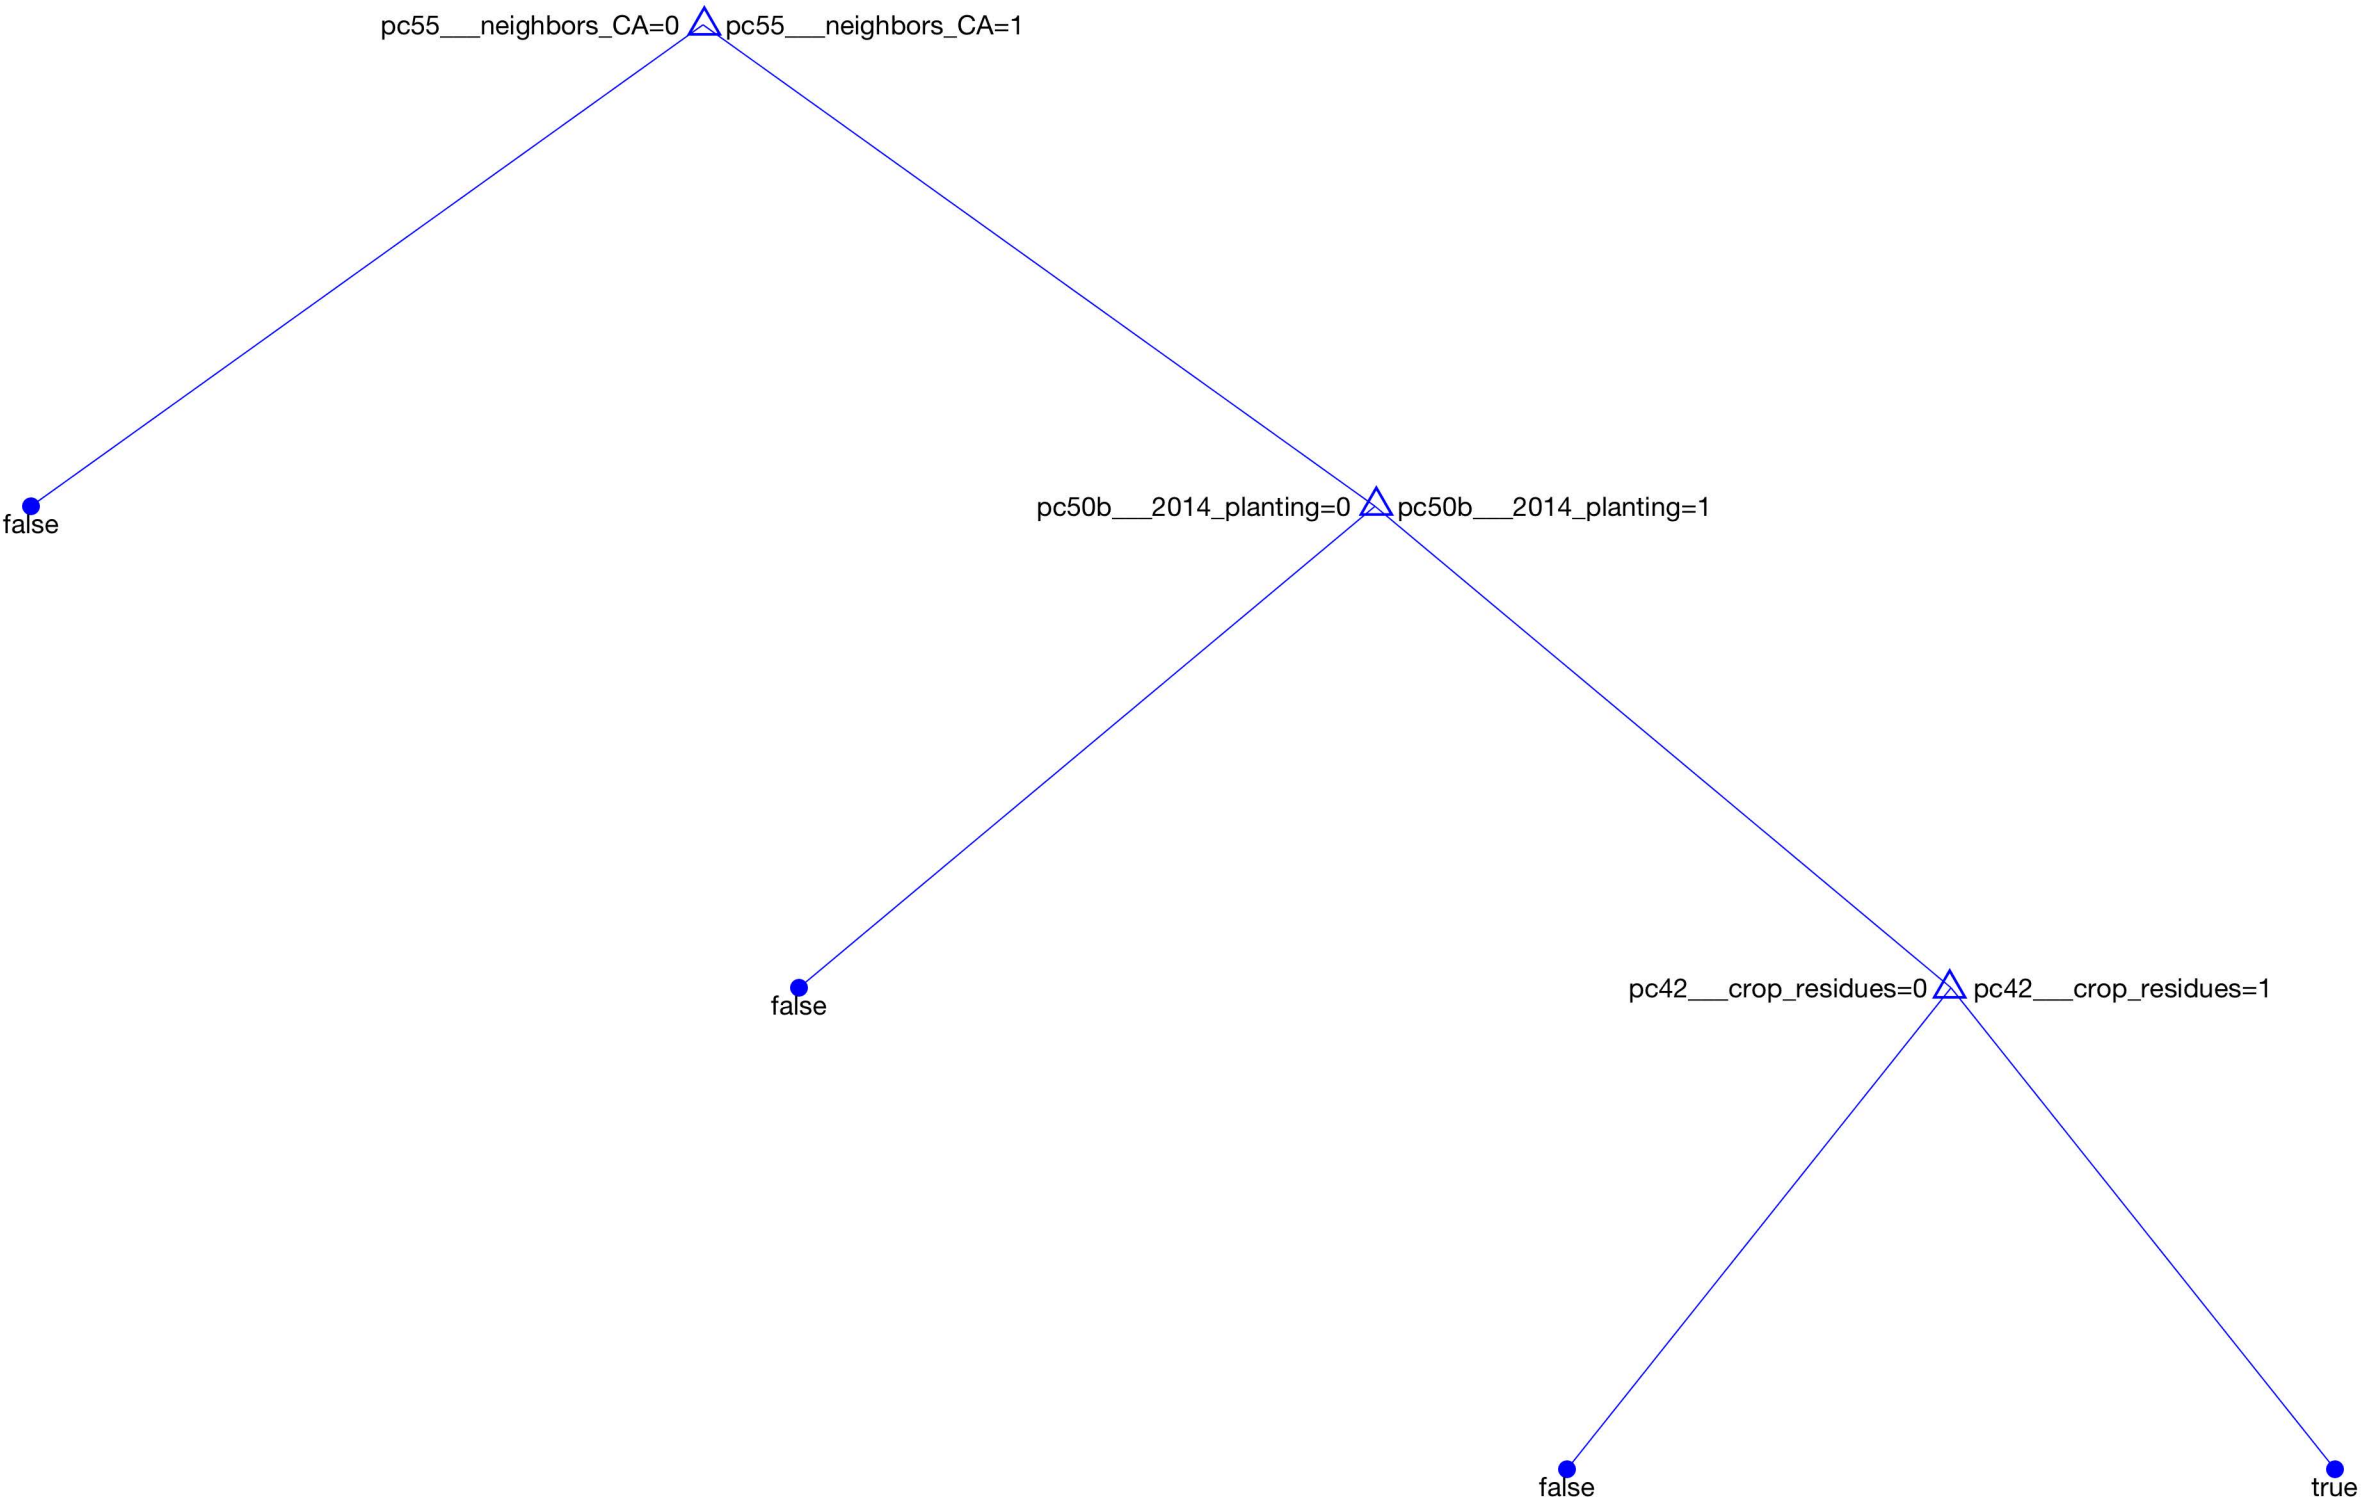



| Node | ProbFalse  | ProbTrue   | Cases |
|------|------------|------------|-------|
| 2    | 0.89891697 | 0.10108303 | 277   |
| 4    | 0.76923077 | 0.23076923 | 78    |
| 6    | 0.70512821 | 0.29487179 | 78    |
| 7    | 0.40223464 | 0.59776536 | 179   |



# AP-CR

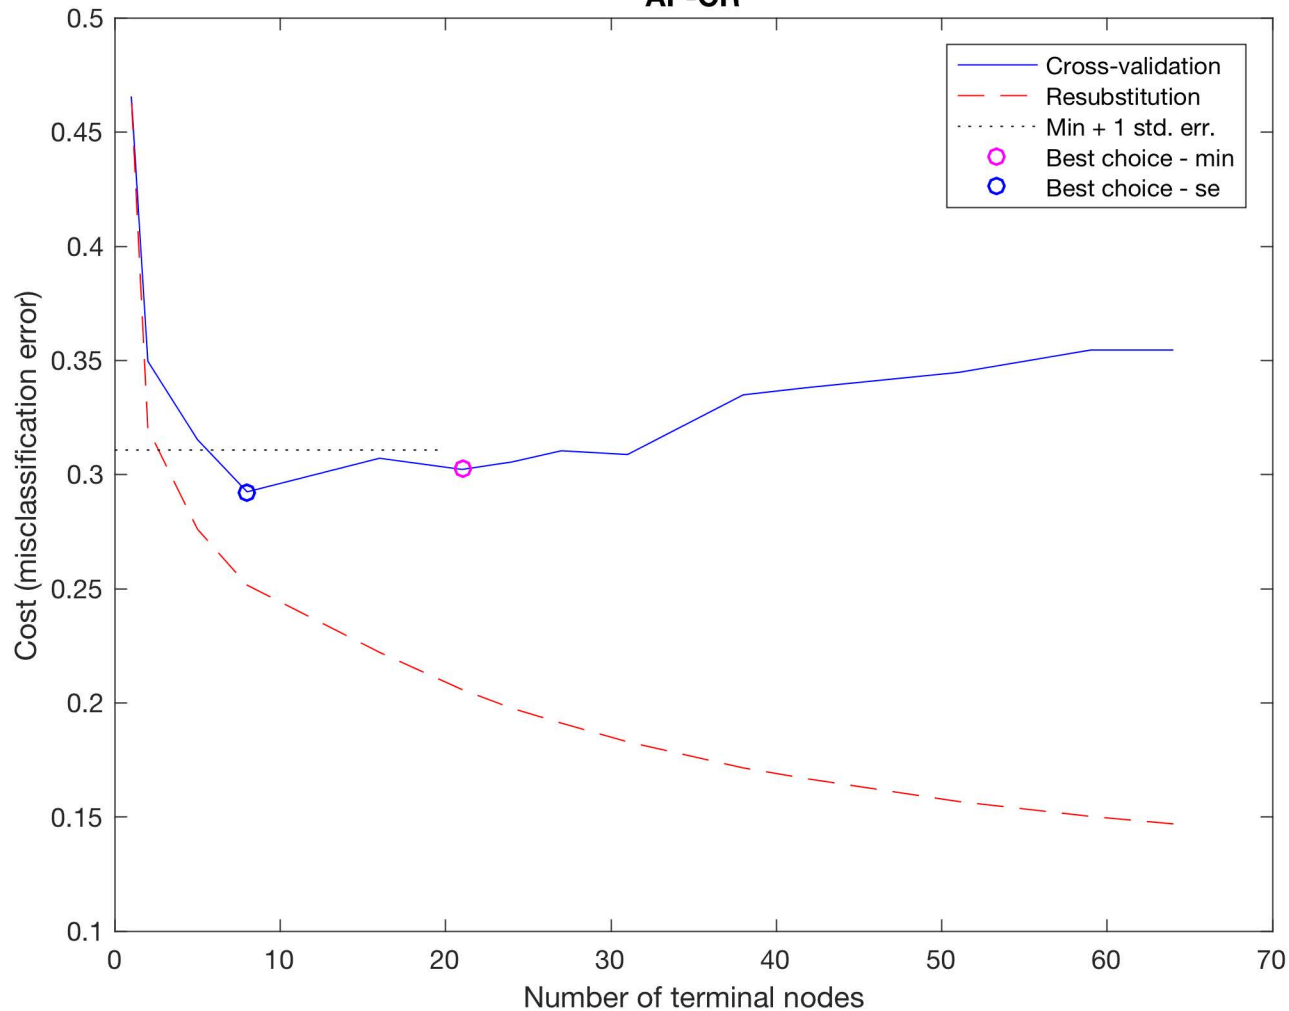

| Node | ProbFalse  | ProbTrue   | Cases |
|------|------------|------------|-------|
| 4    | 0.83739837 | 0.16260163 | 123   |
| 9    | 0.275      | 0.725      | 40    |
| 10   | 0.73684211 | 0.26315789 | 19    |
| 13   | 0.16931217 | 0.83068783 | 189   |
| 14   | 0.23529412 | 0.76470588 | 17    |
| 19   | 0.75       | 0.25       | 8     |
| 20   | 0.85185185 | 0.14814815 | 27    |
| 22   | 1          | 0          | 2     |
| 23   | 0.2        | 0.8        | 30    |
| 25   | 0          | 1          | 2     |
| 26   | 0.34285714 | 0.65714286 | 35    |
| 27   | 1          | 0          | 2     |
| 28   | 0.76666667 | 0.23333333 | 30    |
| 31   | 0.71428571 | 0.28571429 | 21    |
| 33   | 0.125      | 0.875      | 8     |
| 34   | 0.25       | 0.75       | 8     |
| 36   | 0.2        | 0.8        | 5     |
| 38   | 0.71428571 | 0.28571429 | 14    |
| 39   | 0.2        | 0.8        | 5     |
| 40   | 0.375      | 0.625      | 8     |
| 41   | 0.73684211 | 0.26315789 | 19    |

AP-CR - MIN

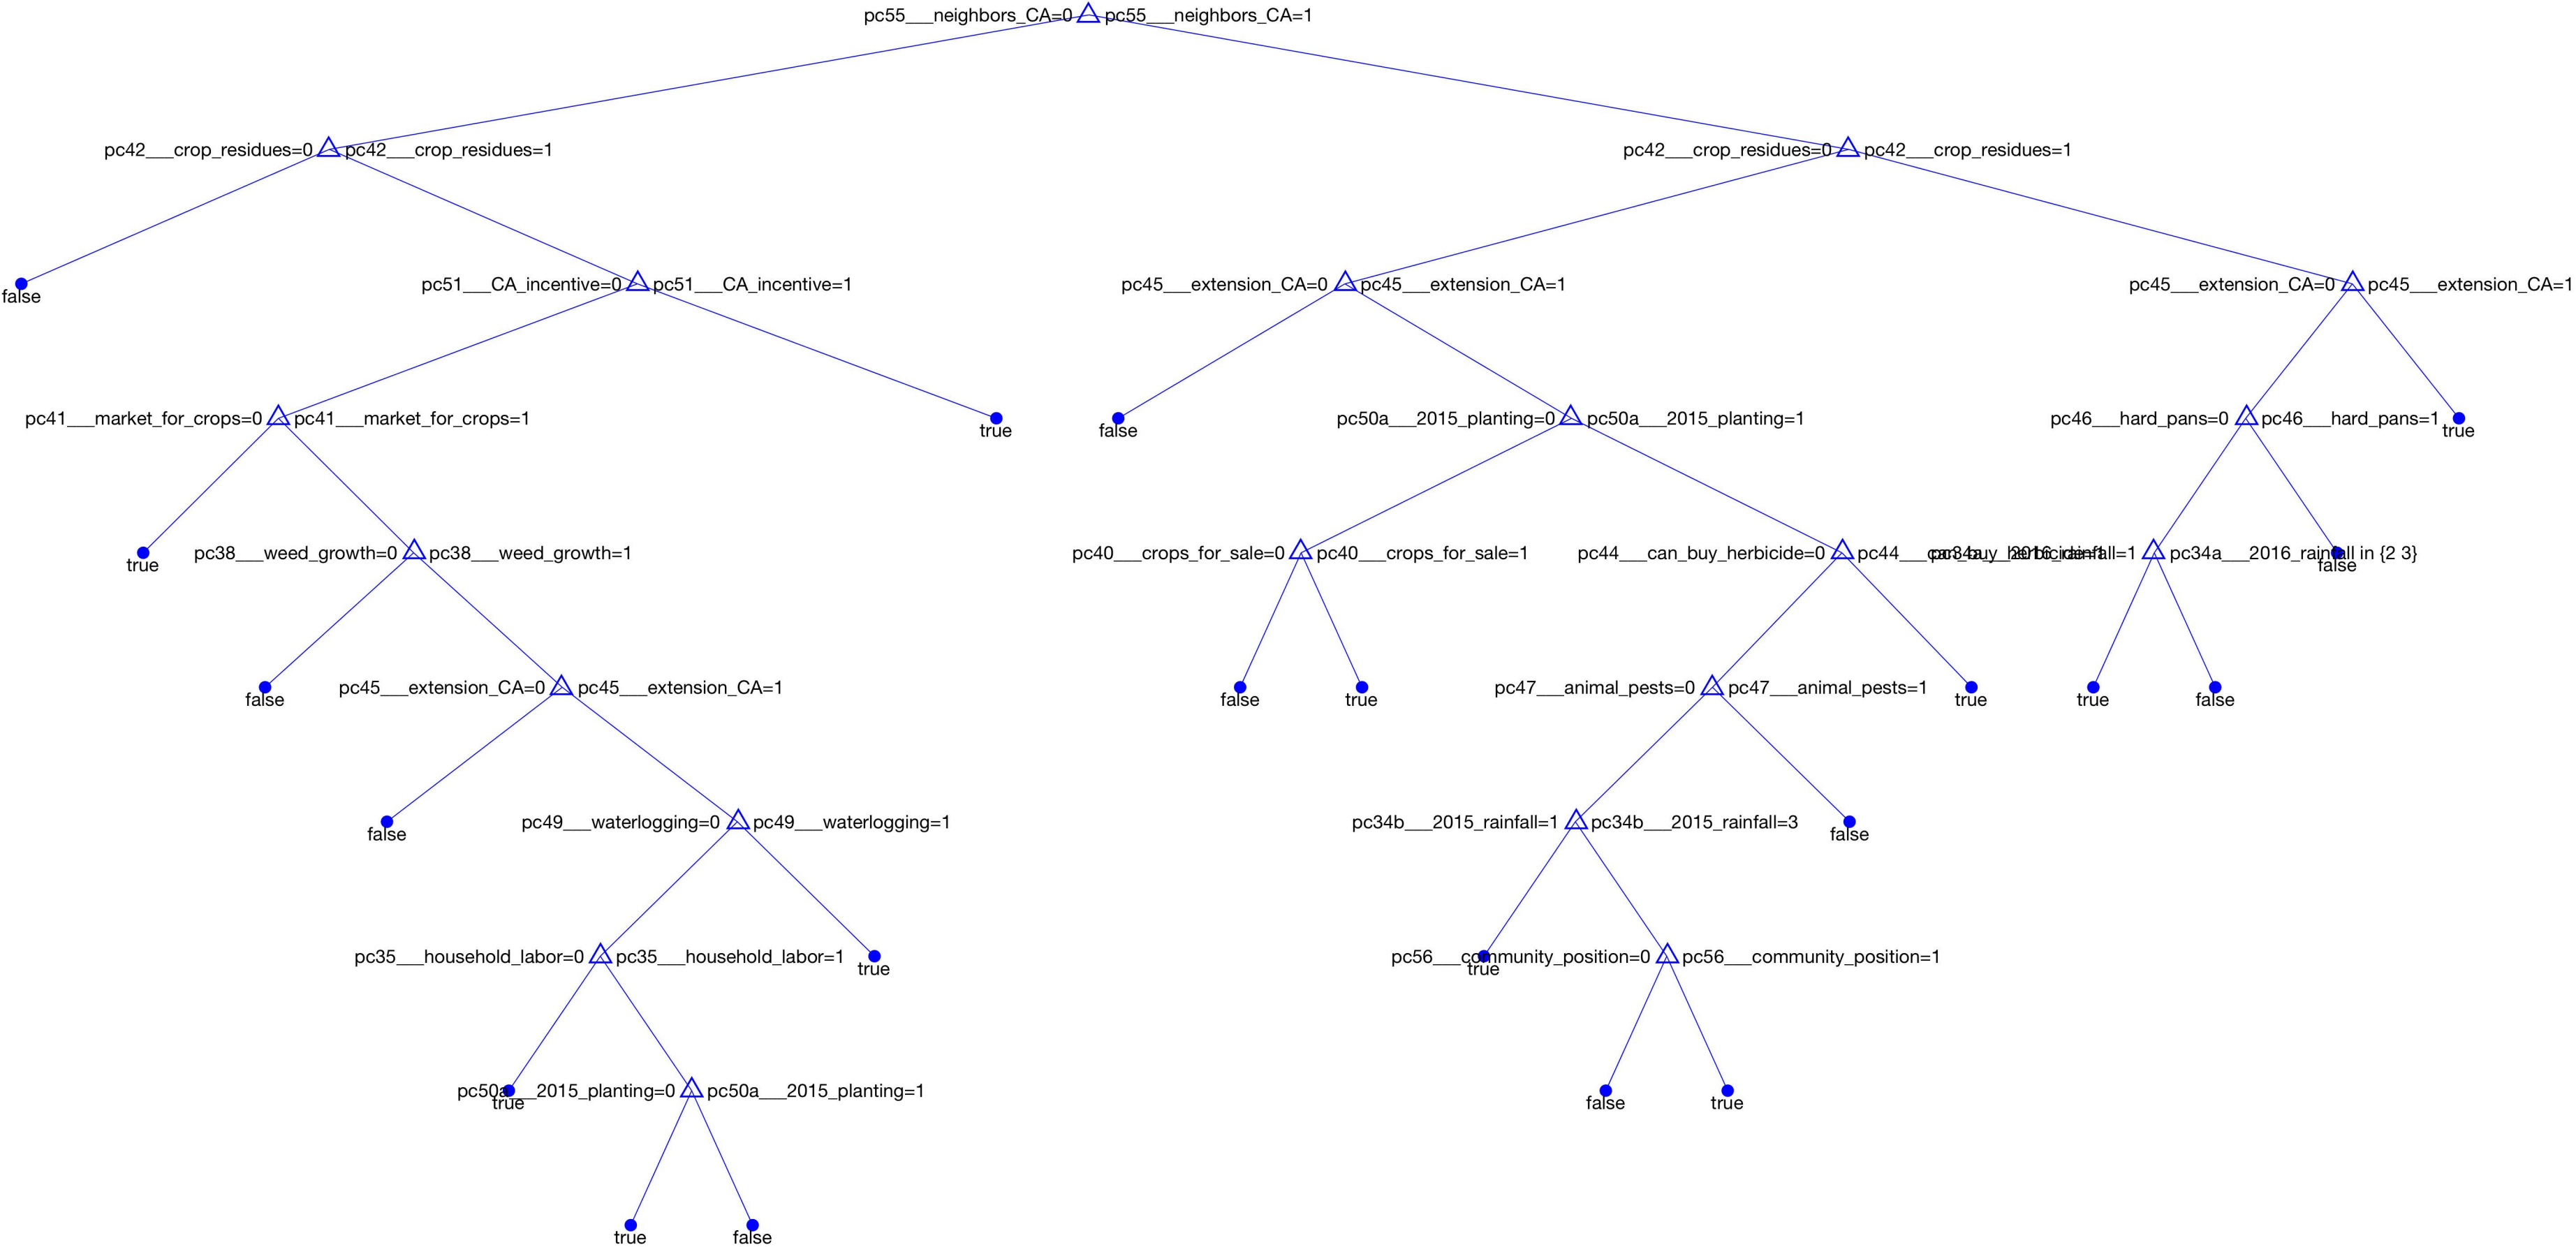

| Node | ProbFalse  | ProbTrue   | Cases |
|------|------------|------------|-------|
| 4    | 0.83739837 | 0.16260163 | 123   |
| 7    | 0.22222222 | 0.77777778 | 234   |
| 9    | 0.275      | 0.725      | 40    |
| 10   | 0.73684211 | 0.26315789 | 19    |
| 12   | 0.23529412 | 0.76470588 | 17    |
| 13   | 0.67010309 | 0.32989691 | 97    |
| 14   | 0.25       | 0.75       | 32    |
| 15   | 0.56       | 0.44       | 50    |

AP-CR - SE

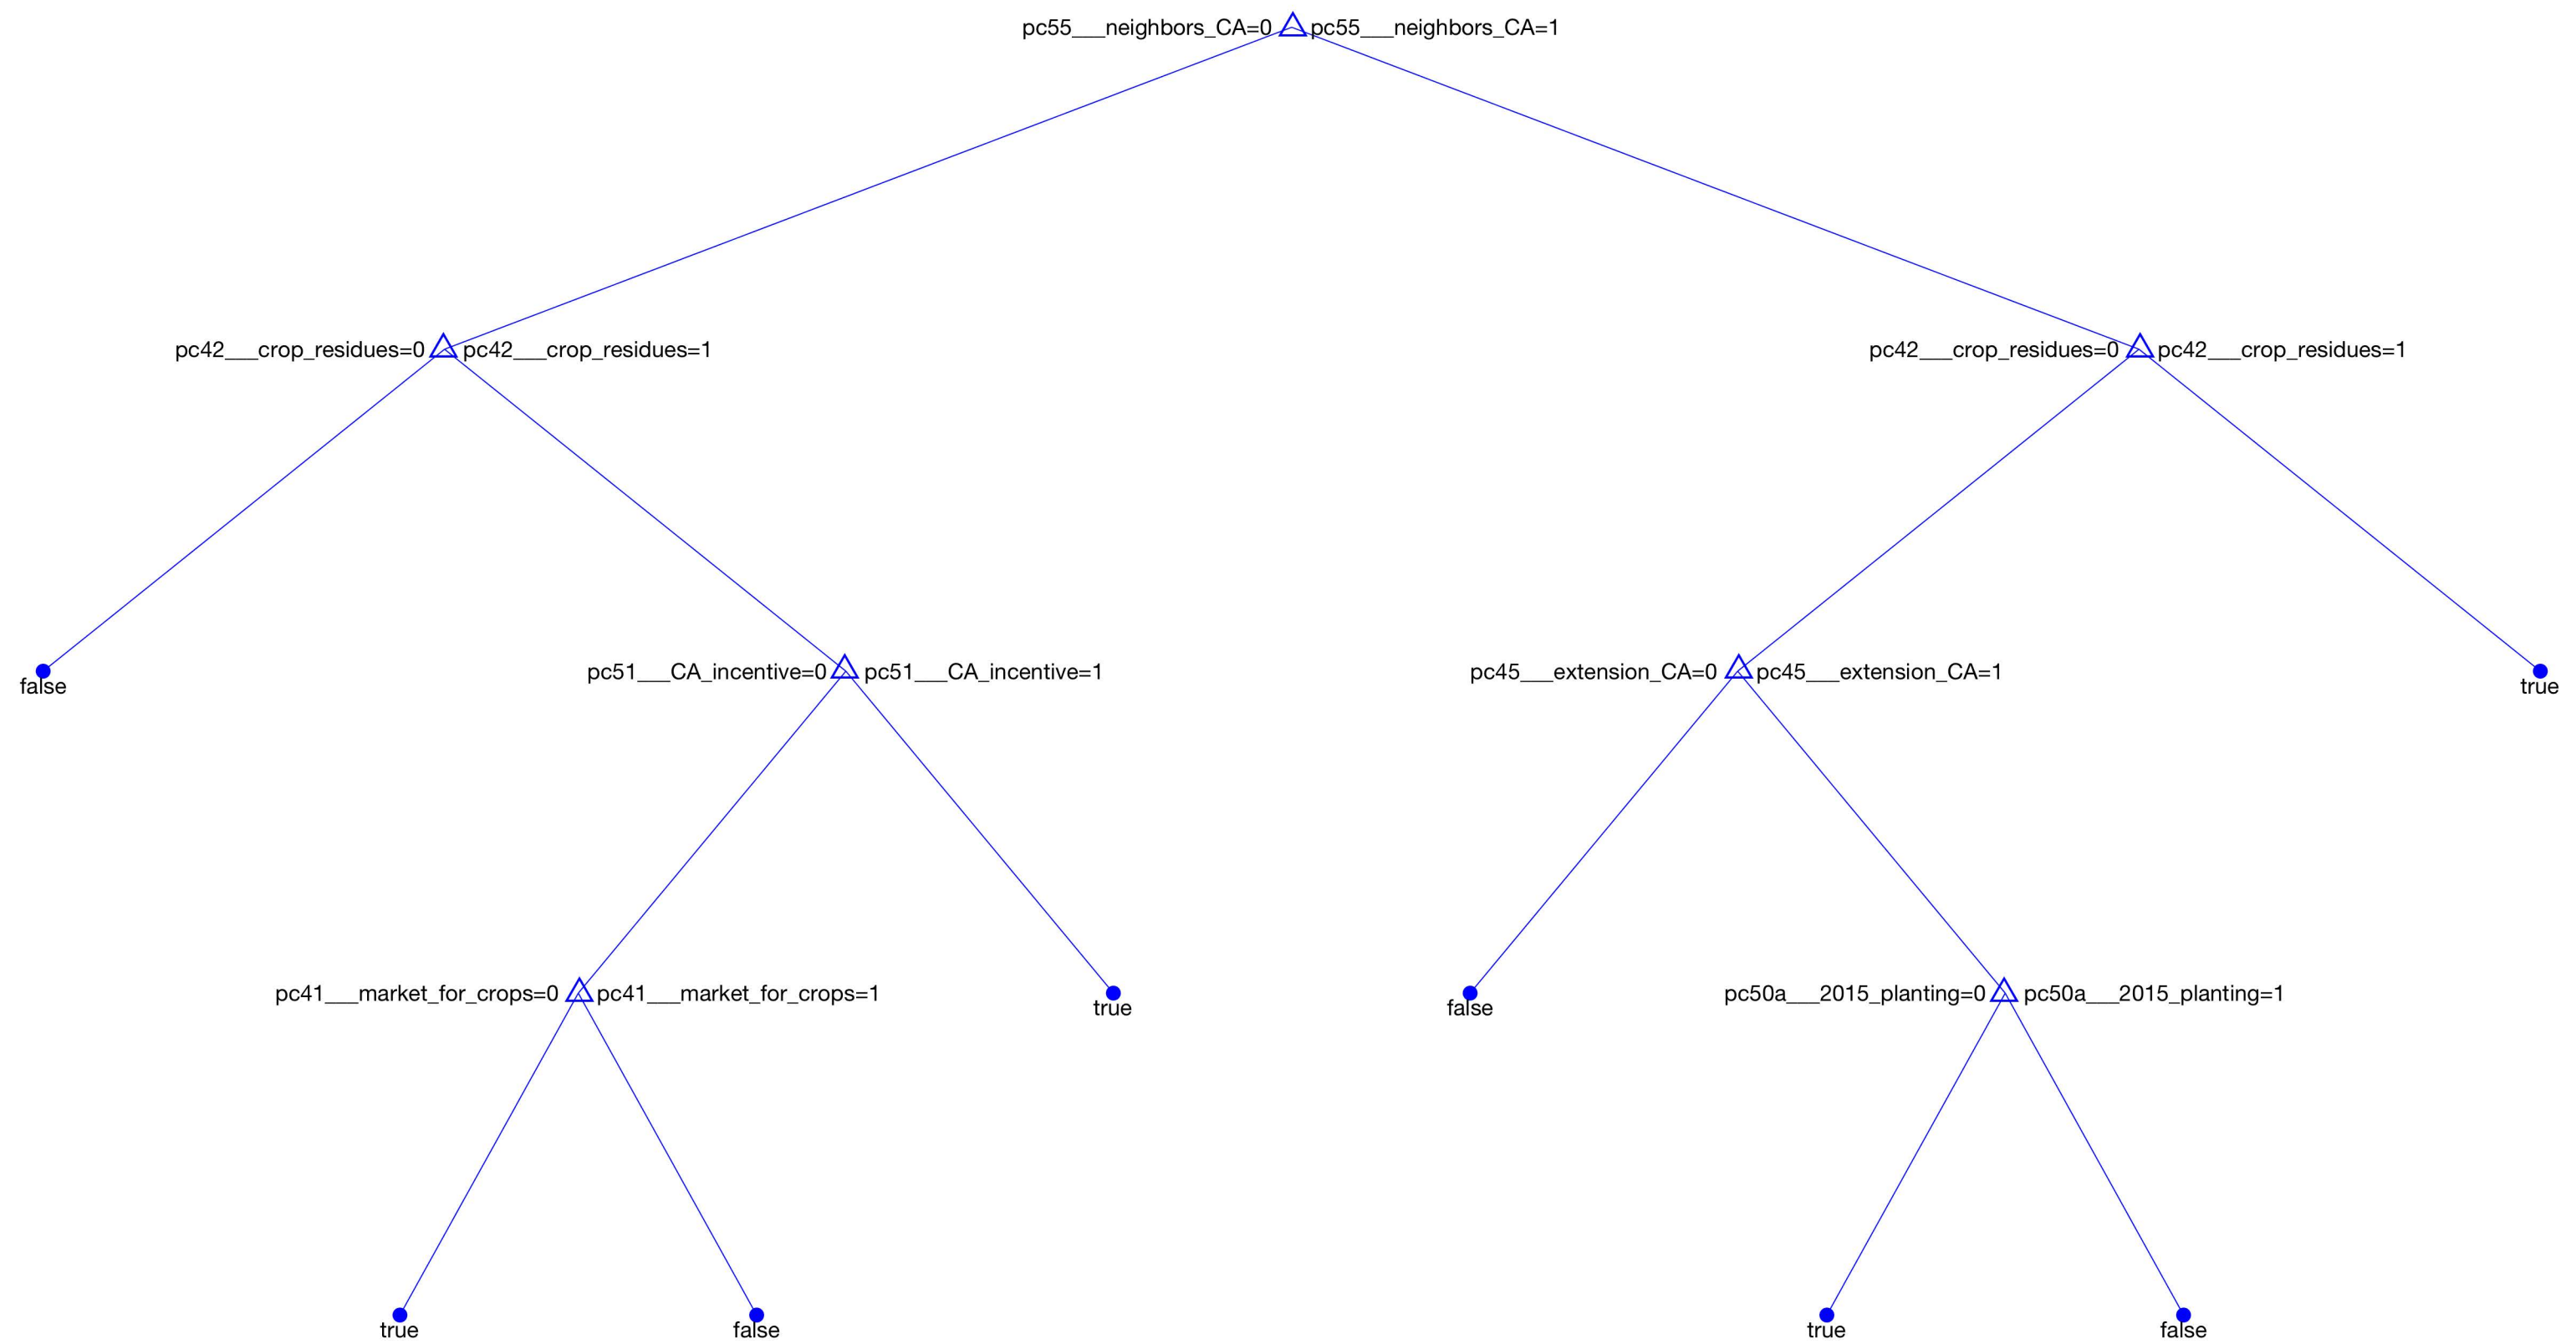

# AP-IC

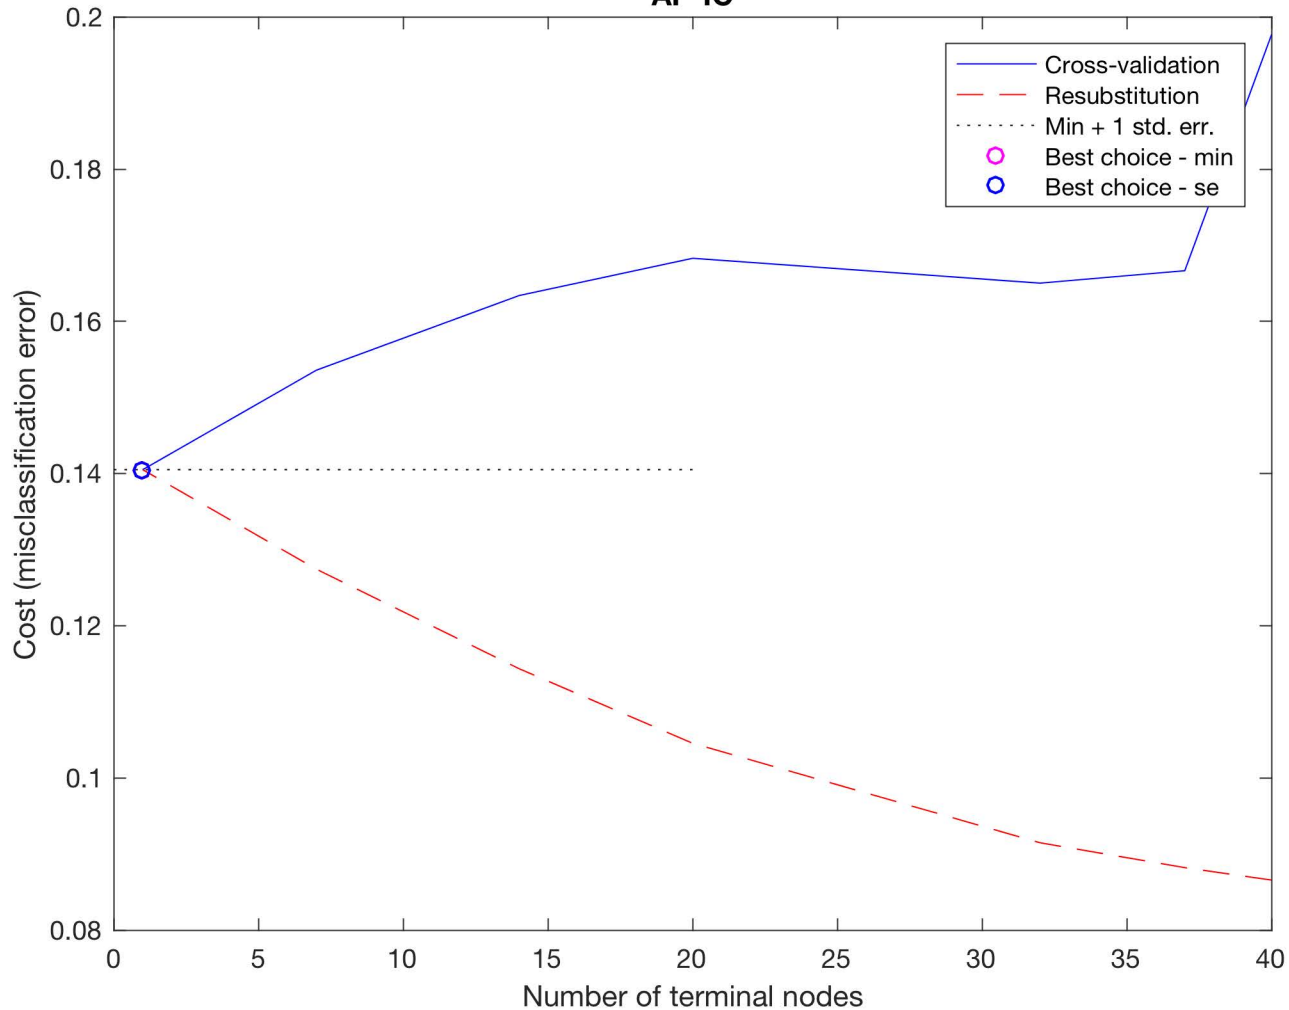



| Node | ProbFalse  | ProbTrue   | Cases |
|------|------------|------------|-------|
| 1    | 0.14052288 | 0.85947712 | 612   |



true

| Node | ProbFalse  | ProbTrue   | Cases |
|------|------------|------------|-------|
| 1    | 0.14052288 | 0.85947712 | 612   |

true

# AP-ZT

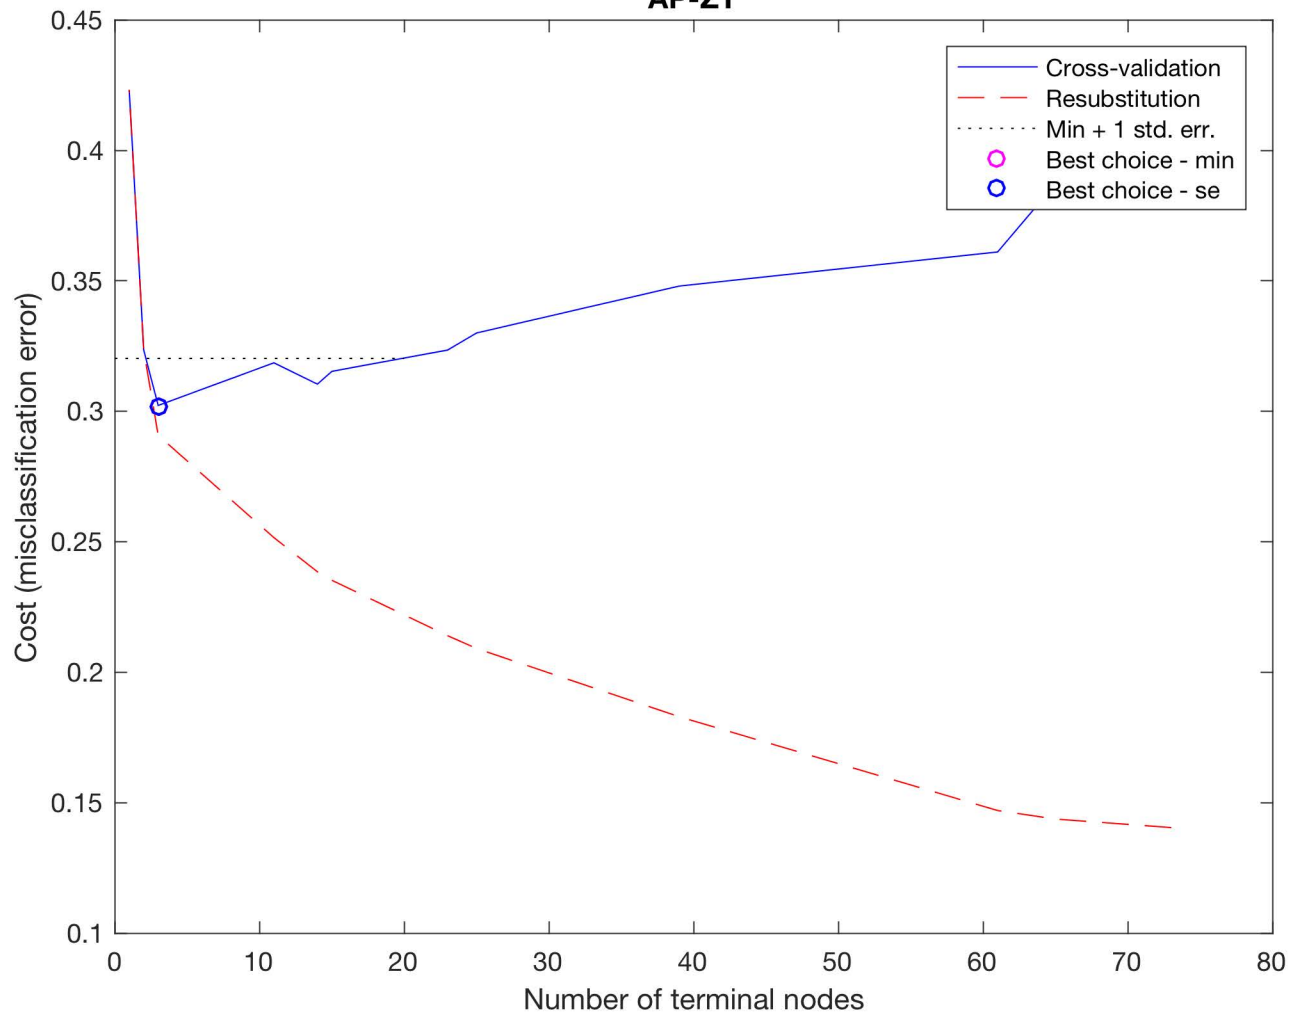

| Node | ProbFalse  | ProbTrue   | Cases |
|------|------------|------------|-------|
| 2    | 0.77978339 | 0.22021661 | 277   |
| 4    | 0.57692308 | 0.42307692 | 130   |
| 5    | 0.30243902 | 0.69756098 | 205   |

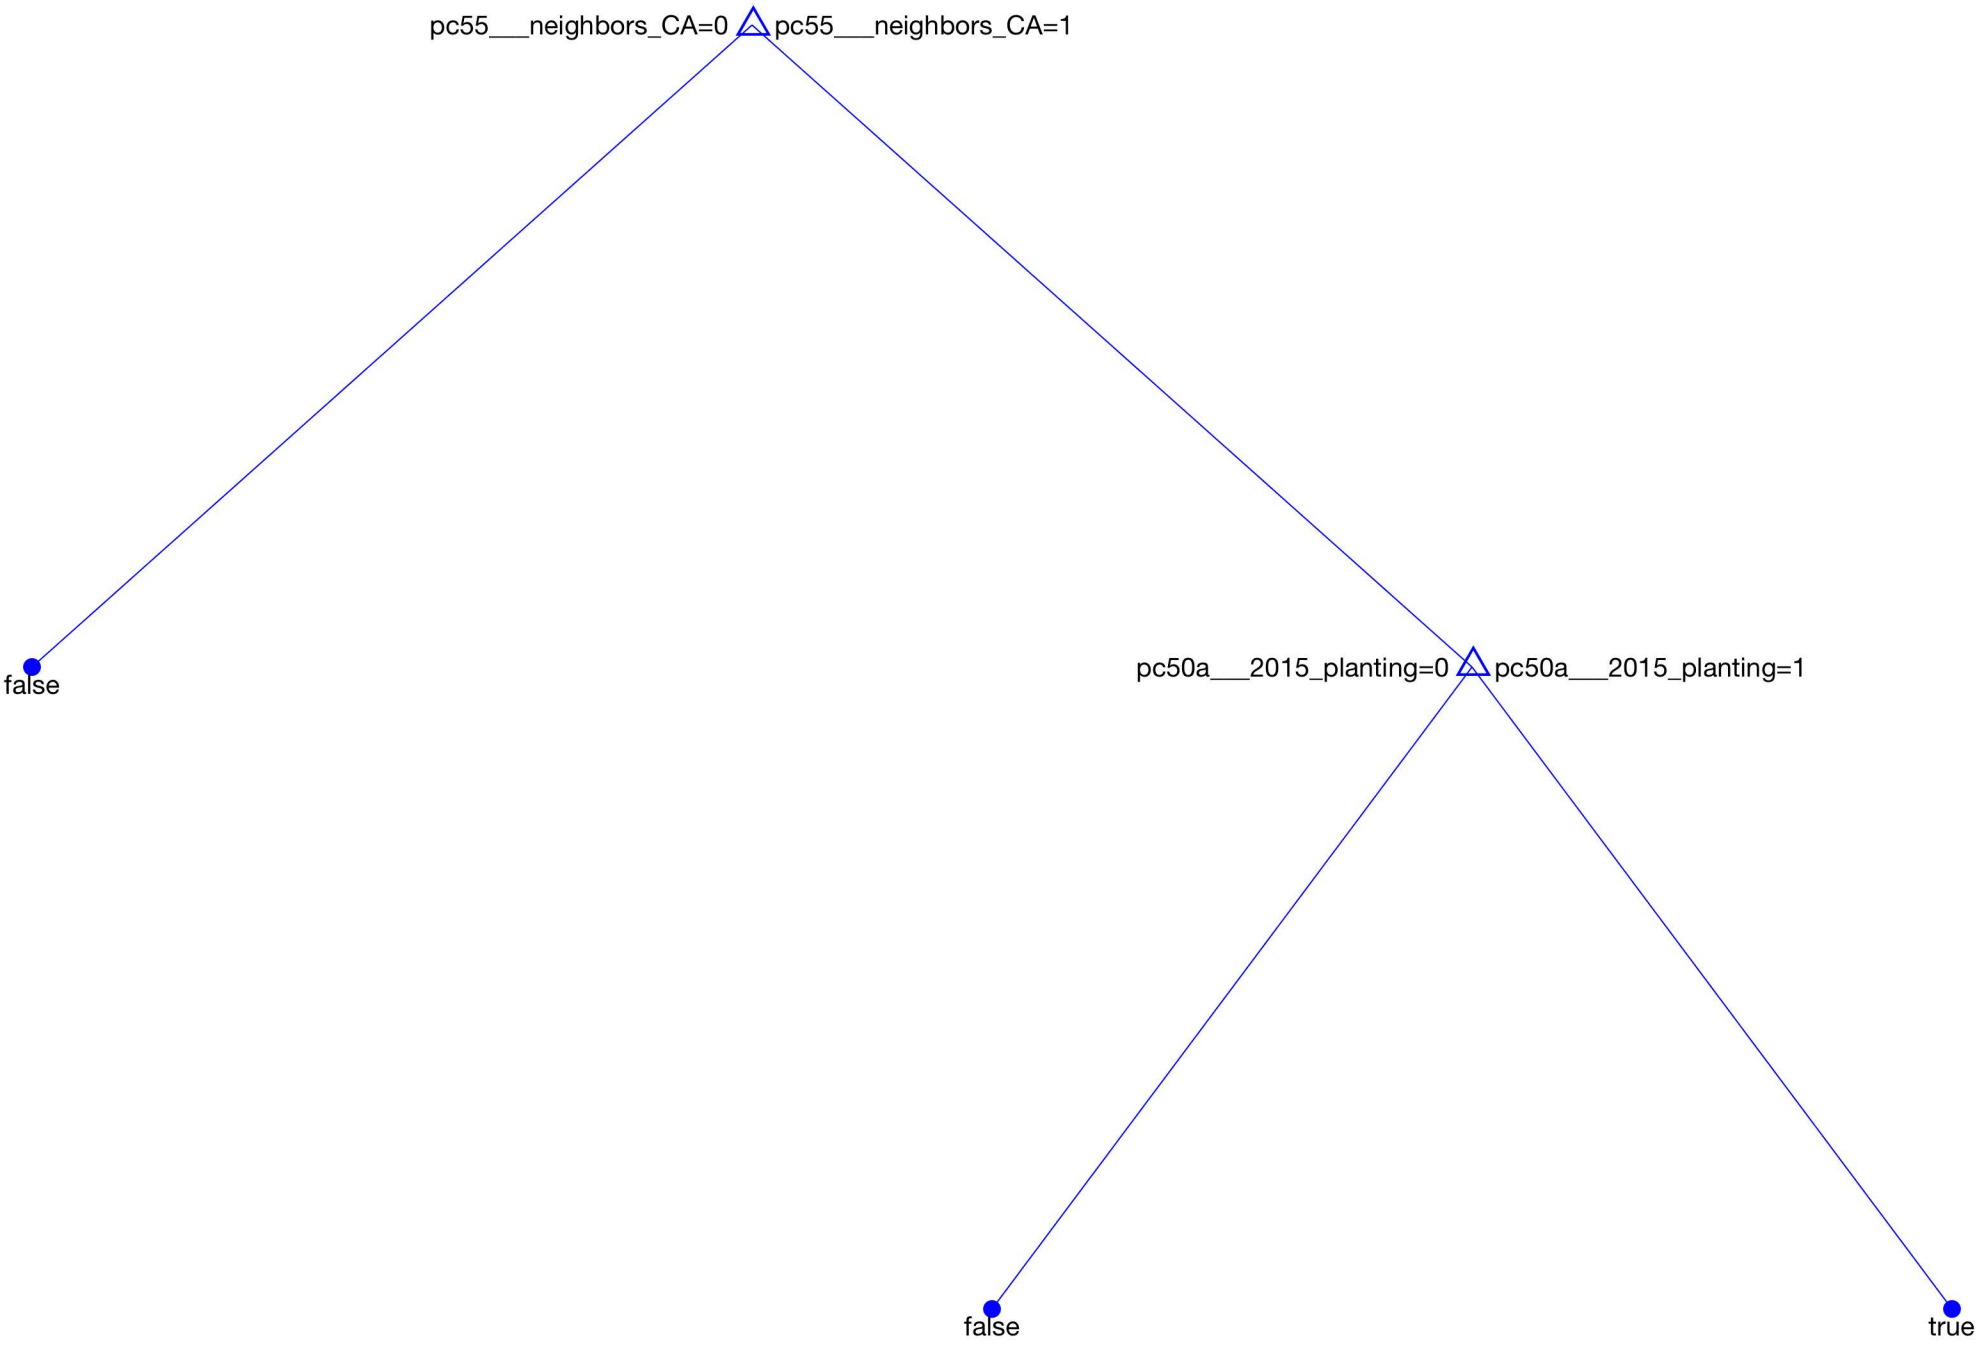

| Node | ProbFalse  | ProbTrue   | Cases |
|------|------------|------------|-------|
| 2    | 0.77978339 | 0.22021661 | 277   |
| 4    | 0.57692308 | 0.42307692 | 130   |
| 5    | 0.30243902 | 0.69756098 | 205   |



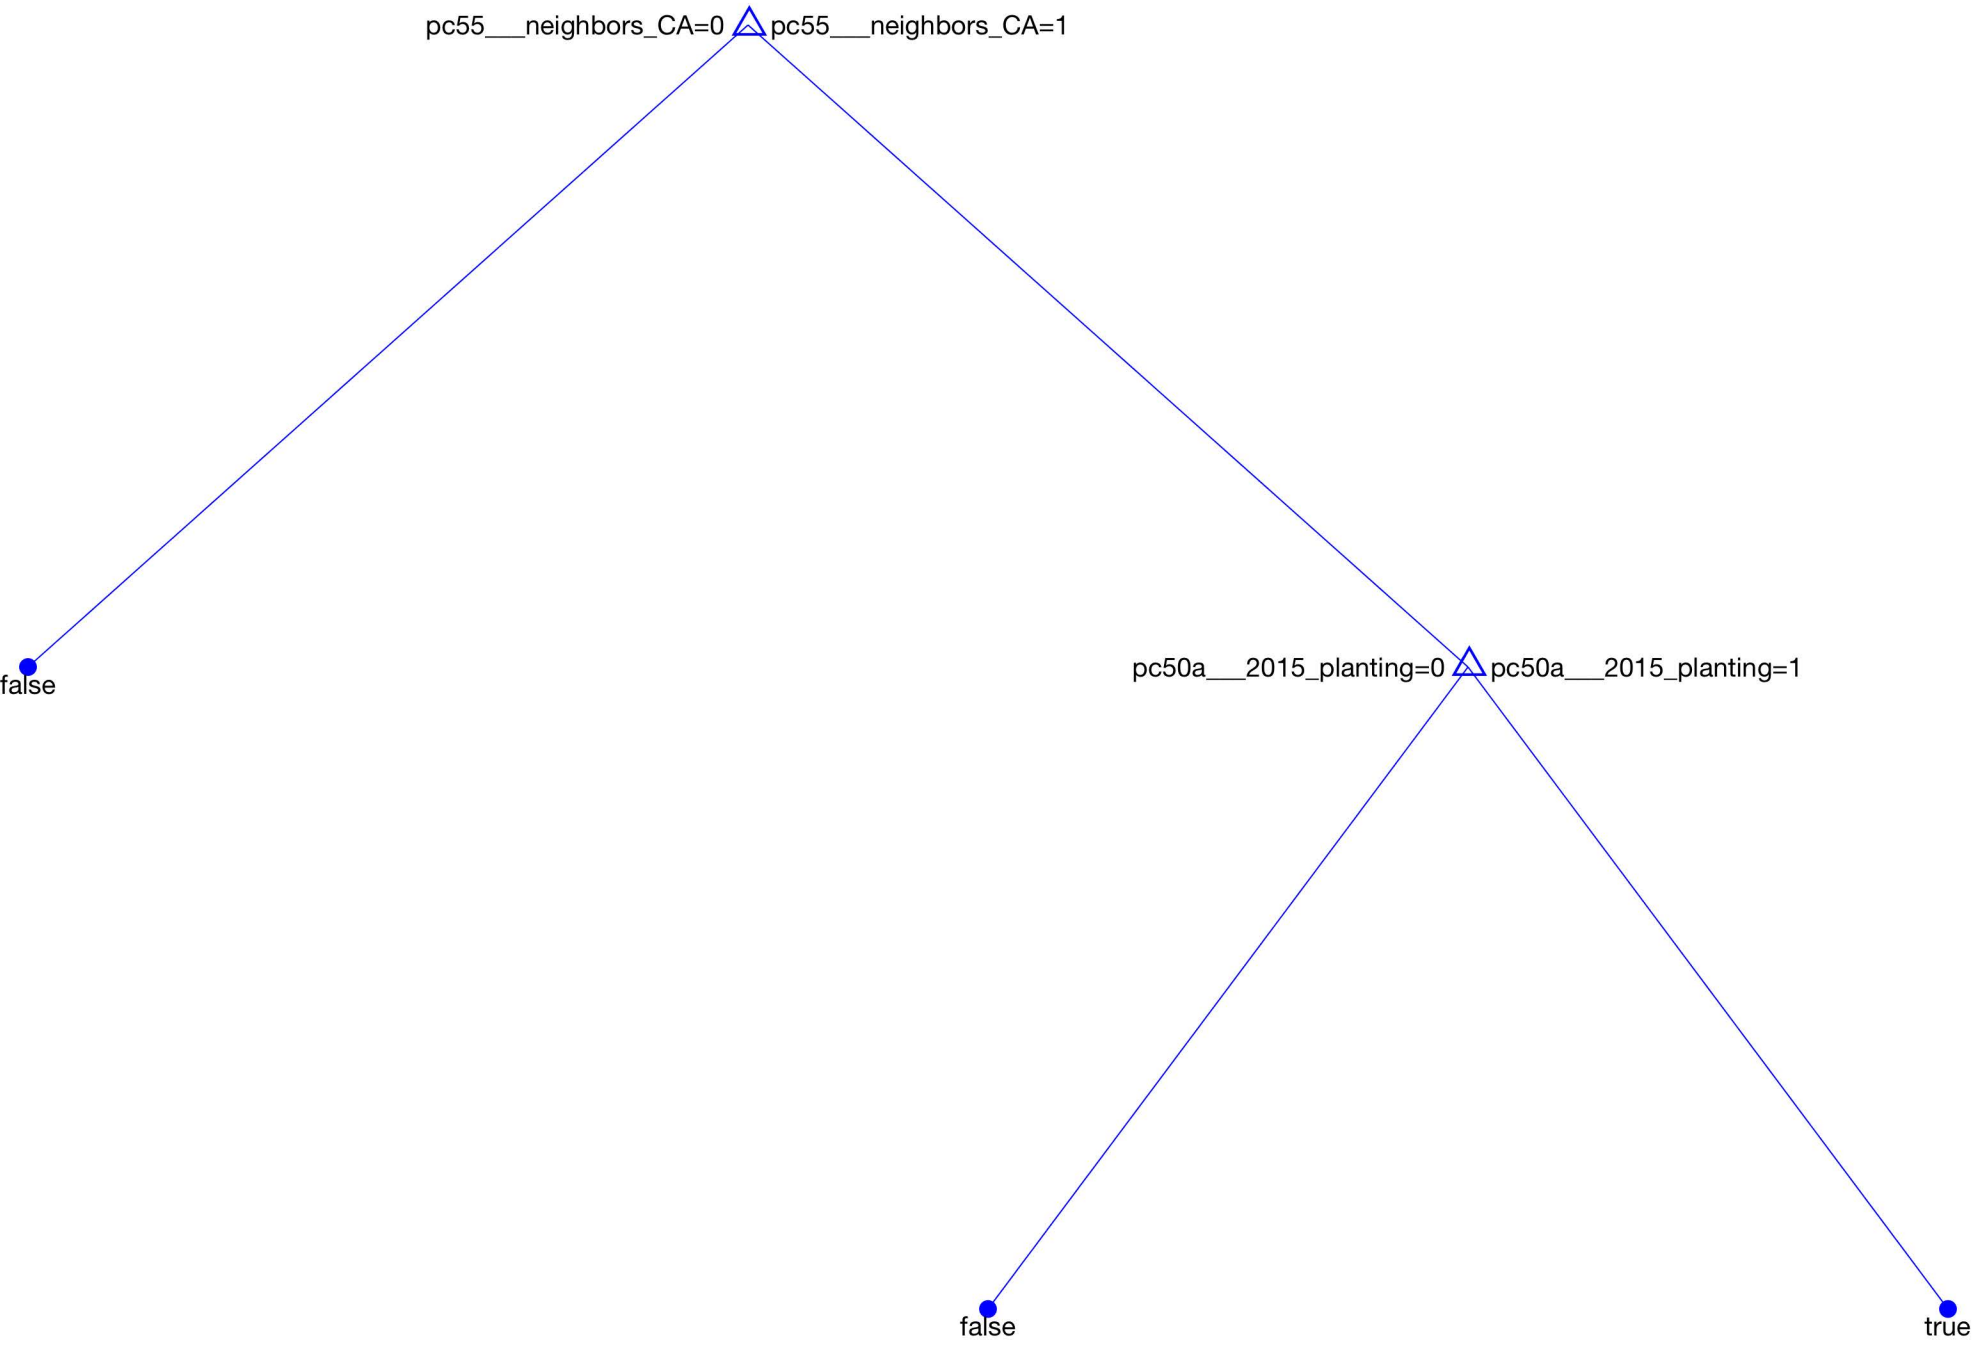

# NAP-CA

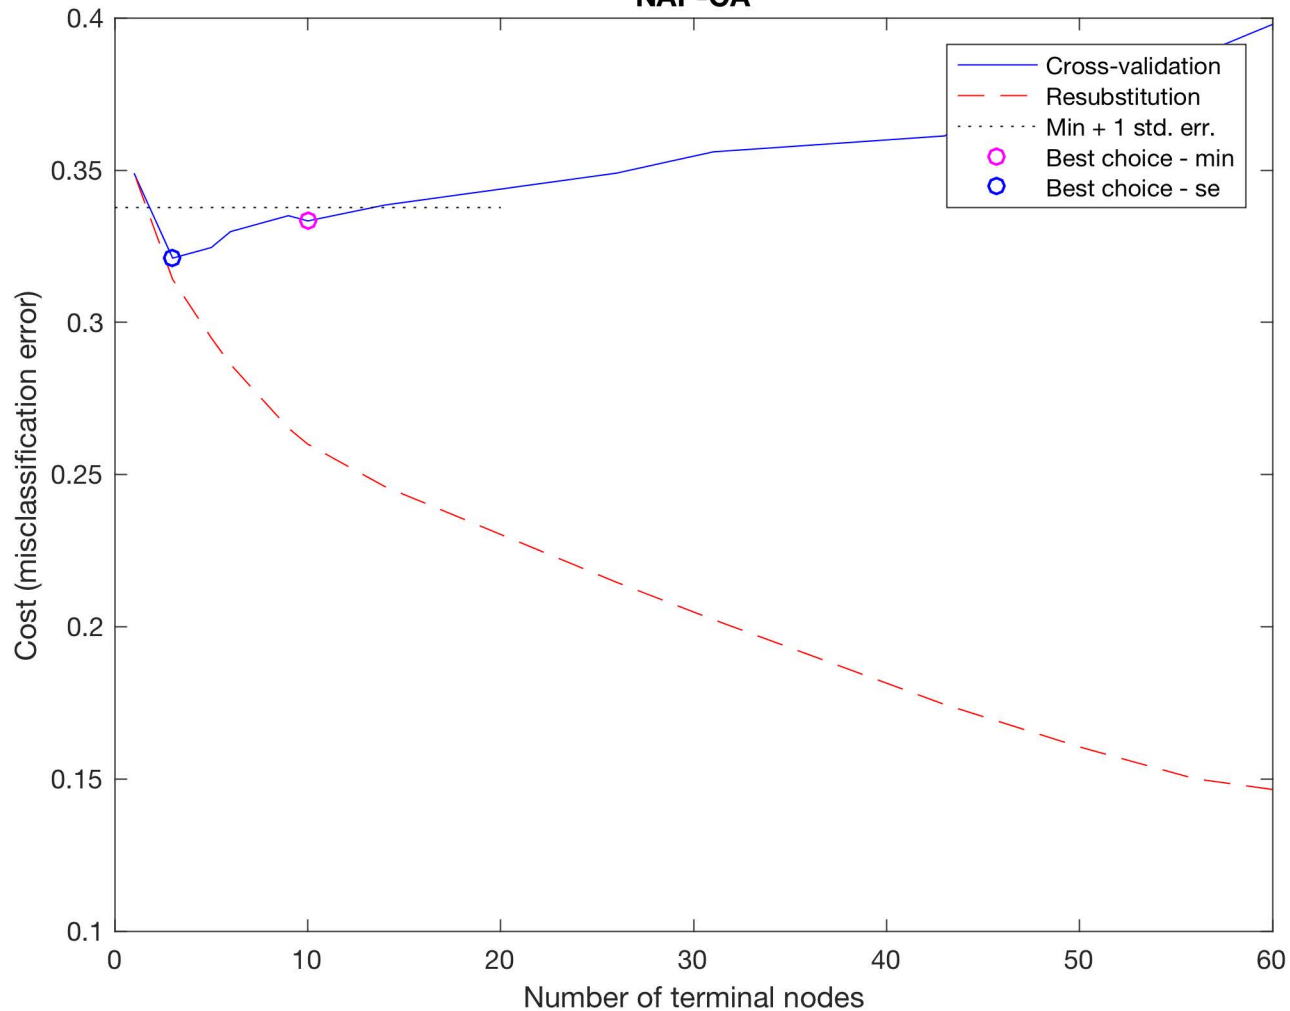

| Node | ProbFalse  | ProbTrue   | Cases |
|------|------------|------------|-------|
| 2    | 0.78884462 | 0.21115538 | 251   |
| 6    | 0.84375    | 0.15625    | 32    |
| 8    | 0.31746032 | 0.68253968 | 63    |
| 11   | 0.67816092 | 0.32183908 | 87    |
| 13   | 0.25       | 0.75       | 16    |
| 14   | 0.73333333 | 0.26666667 | 15    |
| 16   | 0.7        | 0.3        | 40    |
| 17   | 0.30769231 | 0.69230769 | 13    |
| 18   | 0.24137931 | 0.75862069 | 29    |
| 19   | 0.55555556 | 0.44444444 | 27    |

NAP-CA - MIN

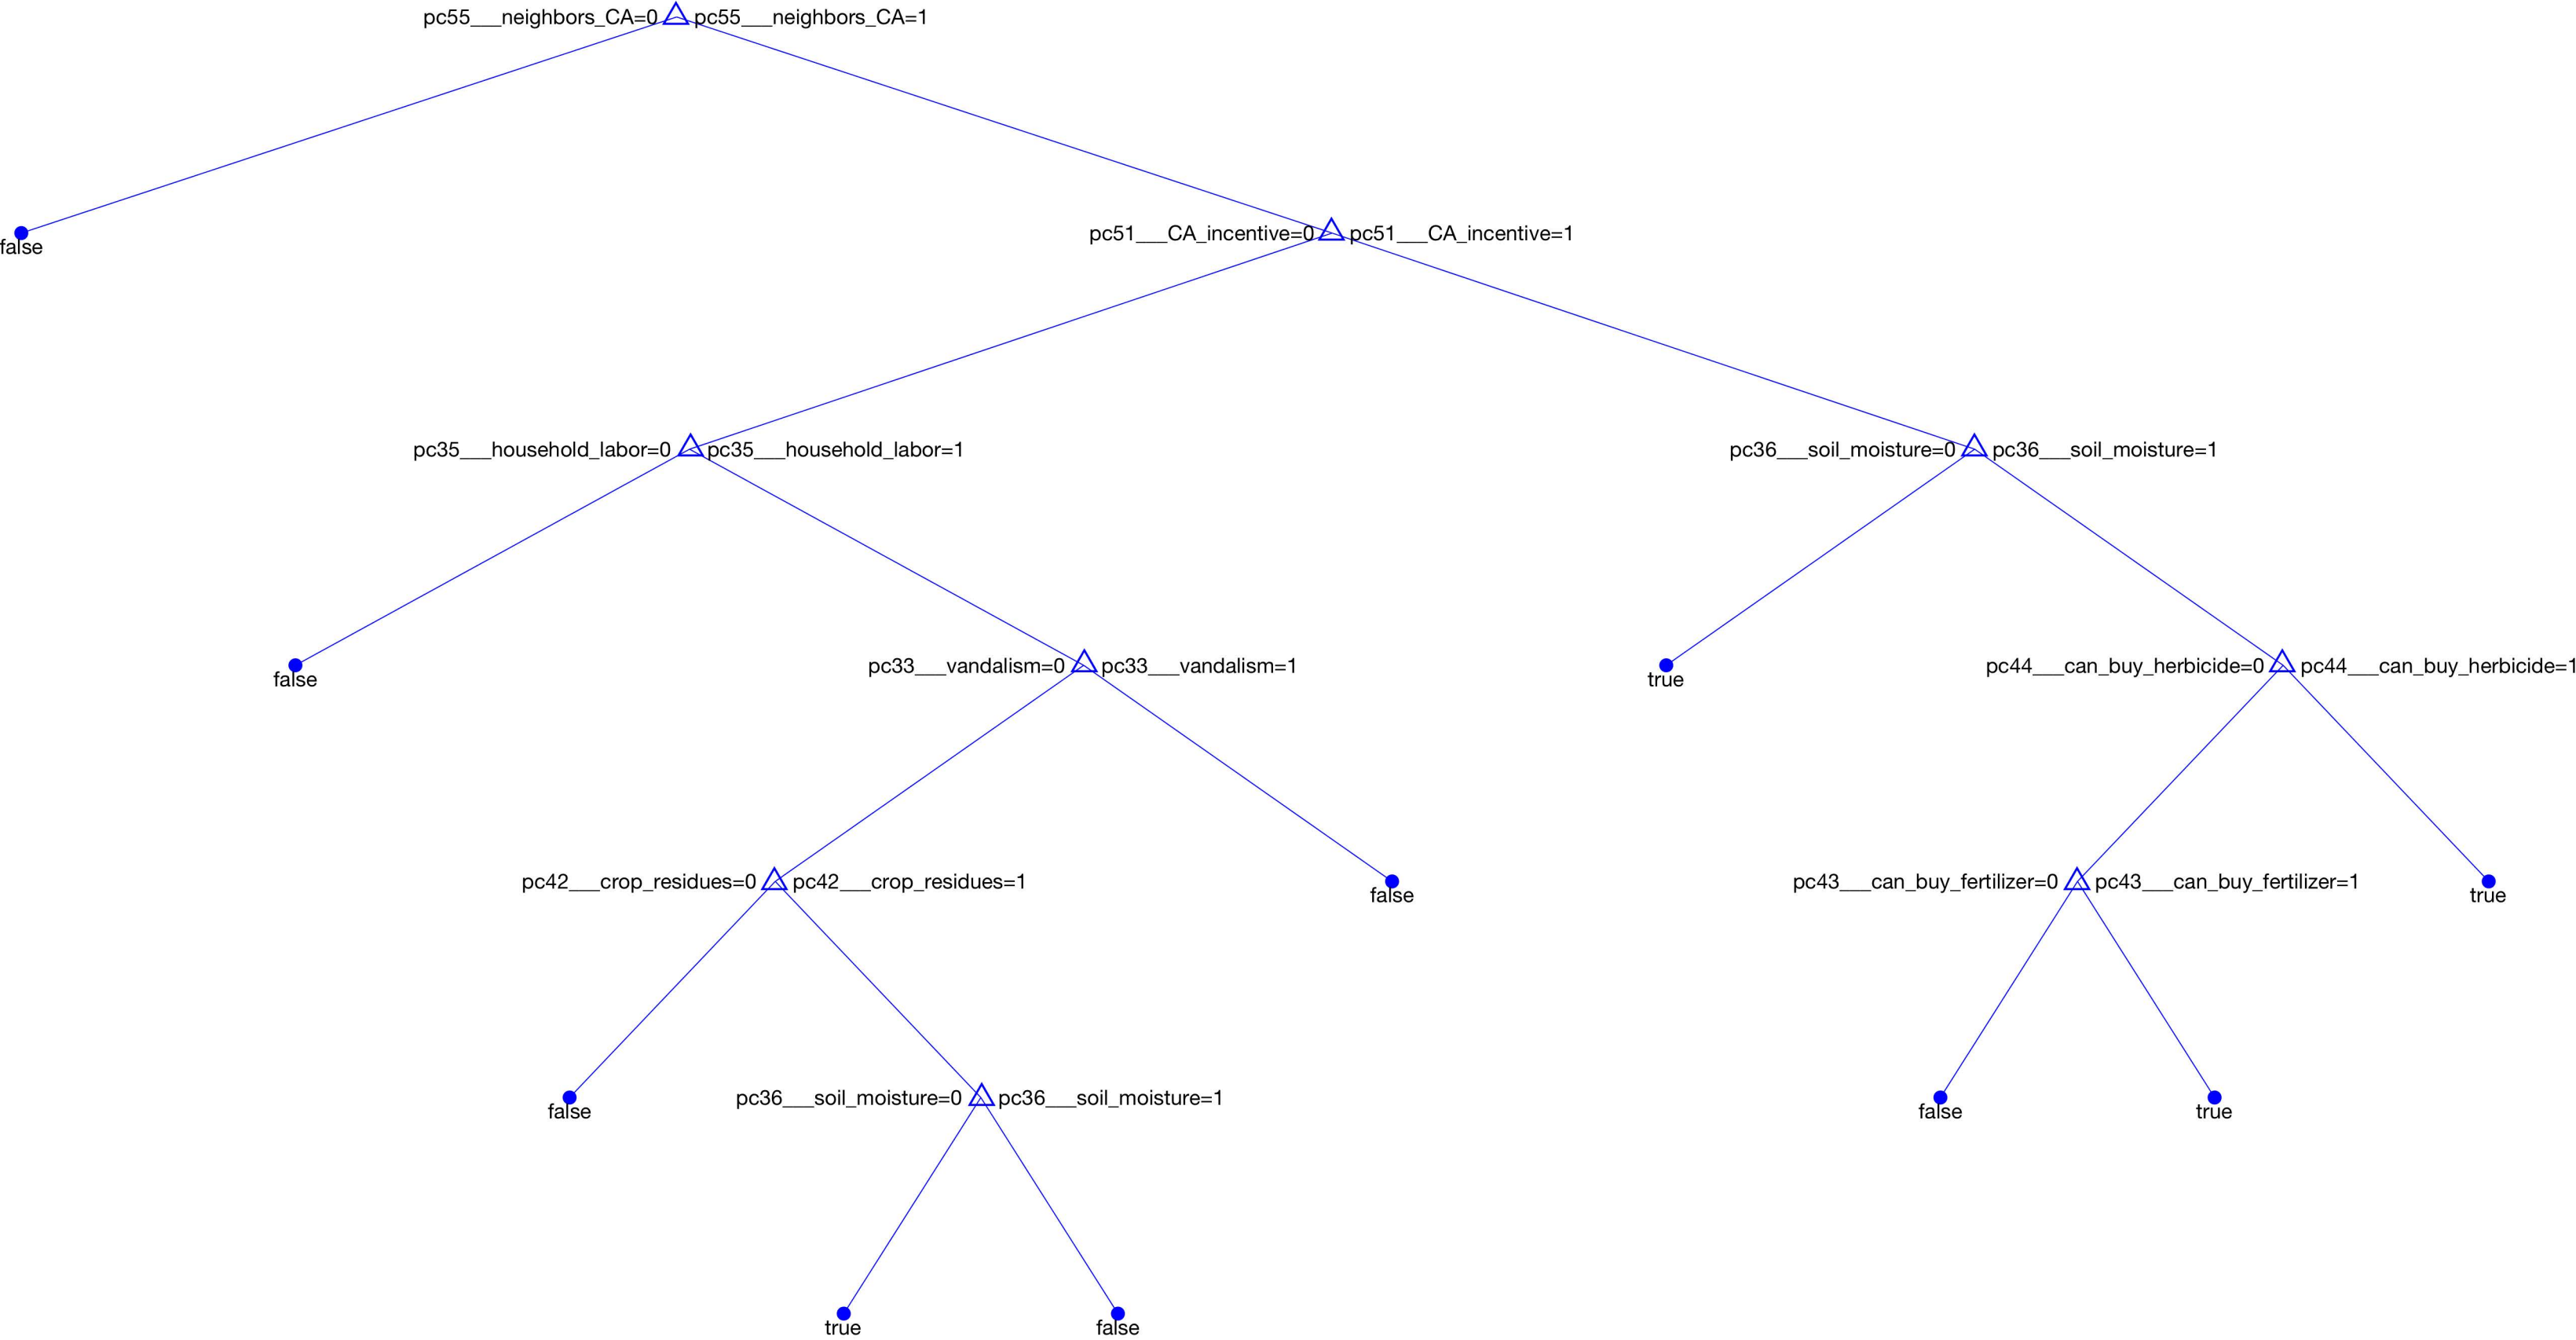

| Node | ProbFalse  | ProbTrue   | Cases |
|------|------------|------------|-------|
| 2    | 0.78884462 | 0.21115538 | 251   |
| 4    | 0.62631579 | 0.37368421 | 190   |
| 5    | 0.42424242 | 0.57575758 | 132   |

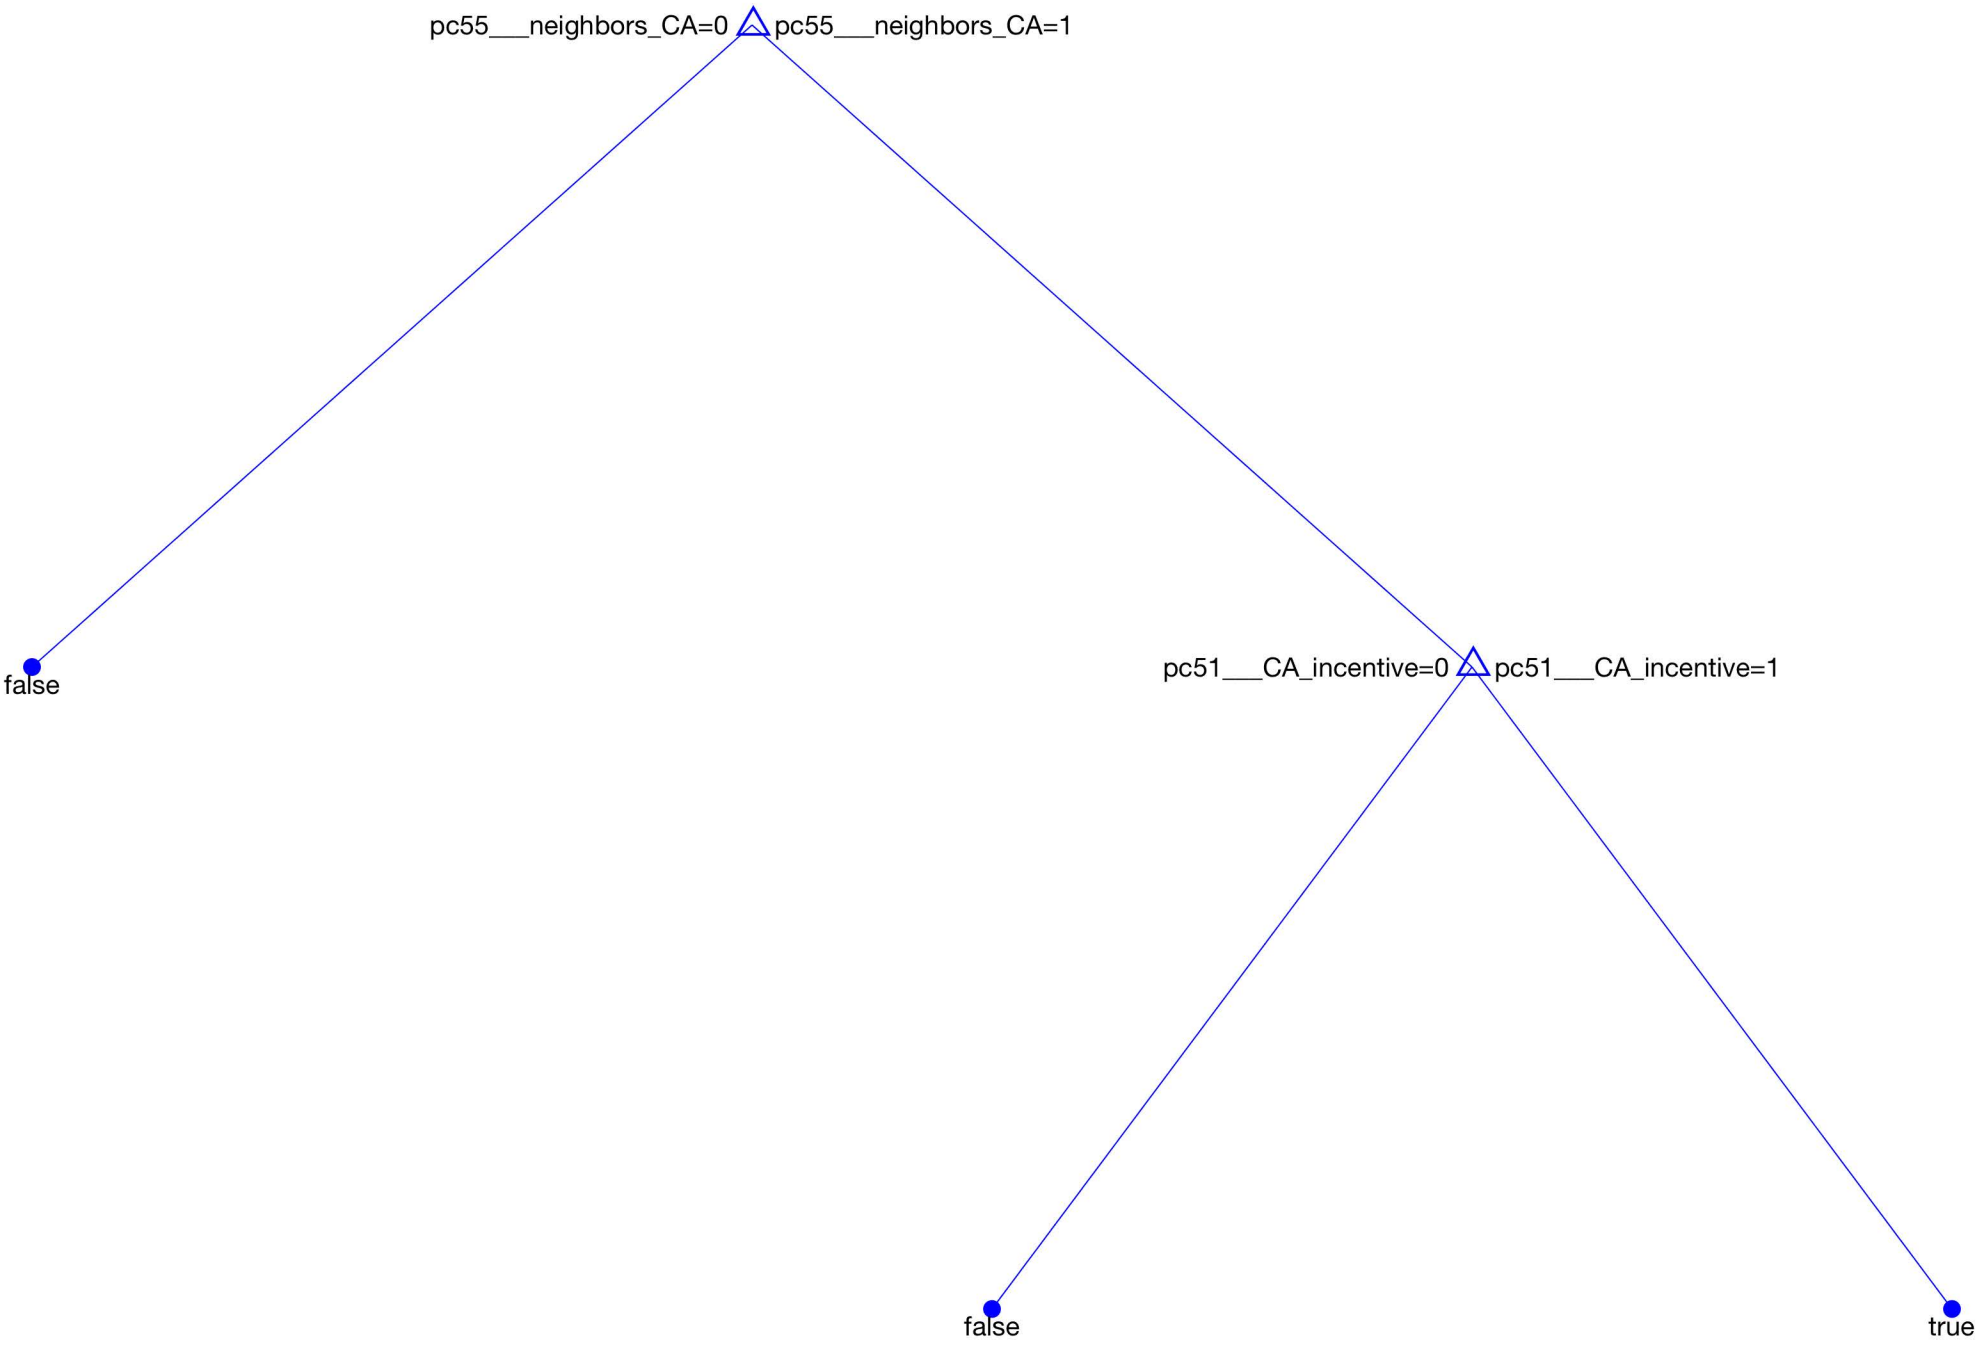

# NAP-CR

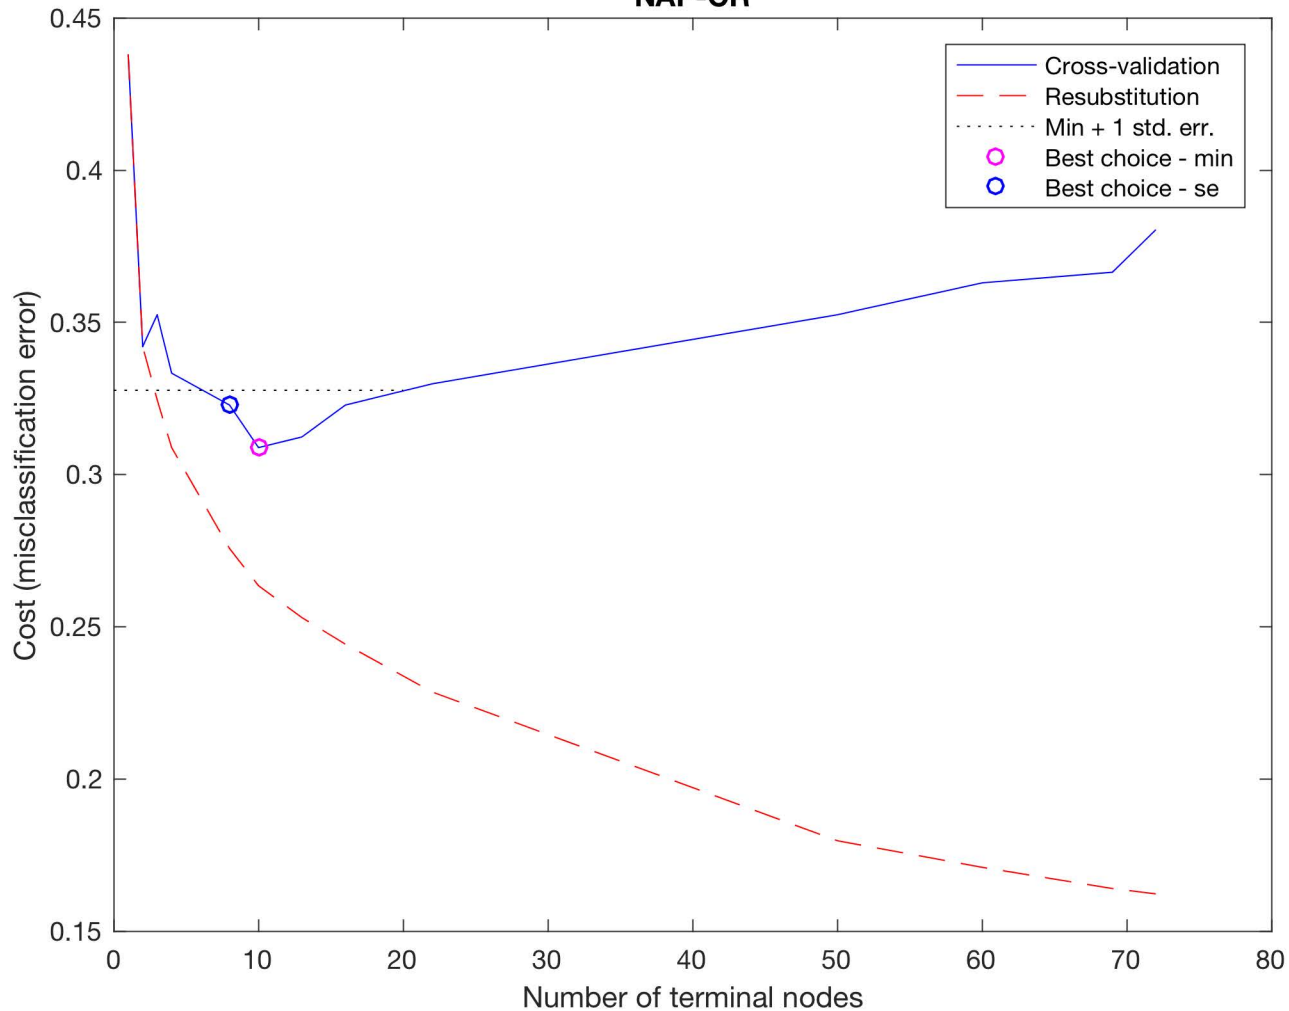

| Node | ProbFalse  | ProbTrue   | Cases |
|------|------------|------------|-------|
| 7    | 0.21153846 | 0.78846154 | 156   |
| 8    | 0.80487805 | 0.19512195 | 82    |
| 10   | 0.76470588 | 0.23529412 | 17    |
| 11   | 0.36231884 | 0.63768116 | 69    |
| 13   | 0.23880597 | 0.76119403 | 67    |
| 14   | 0.65277778 | 0.34722222 | 72    |
| 15   | 0.18181818 | 0.81818182 | 11    |
| 16   | 0.77272727 | 0.22727273 | 22    |
| 18   | 0.65217391 | 0.34782609 | 23    |
| 19   | 0.31481481 | 0.68518519 | 54    |



NAP-CR - MIN

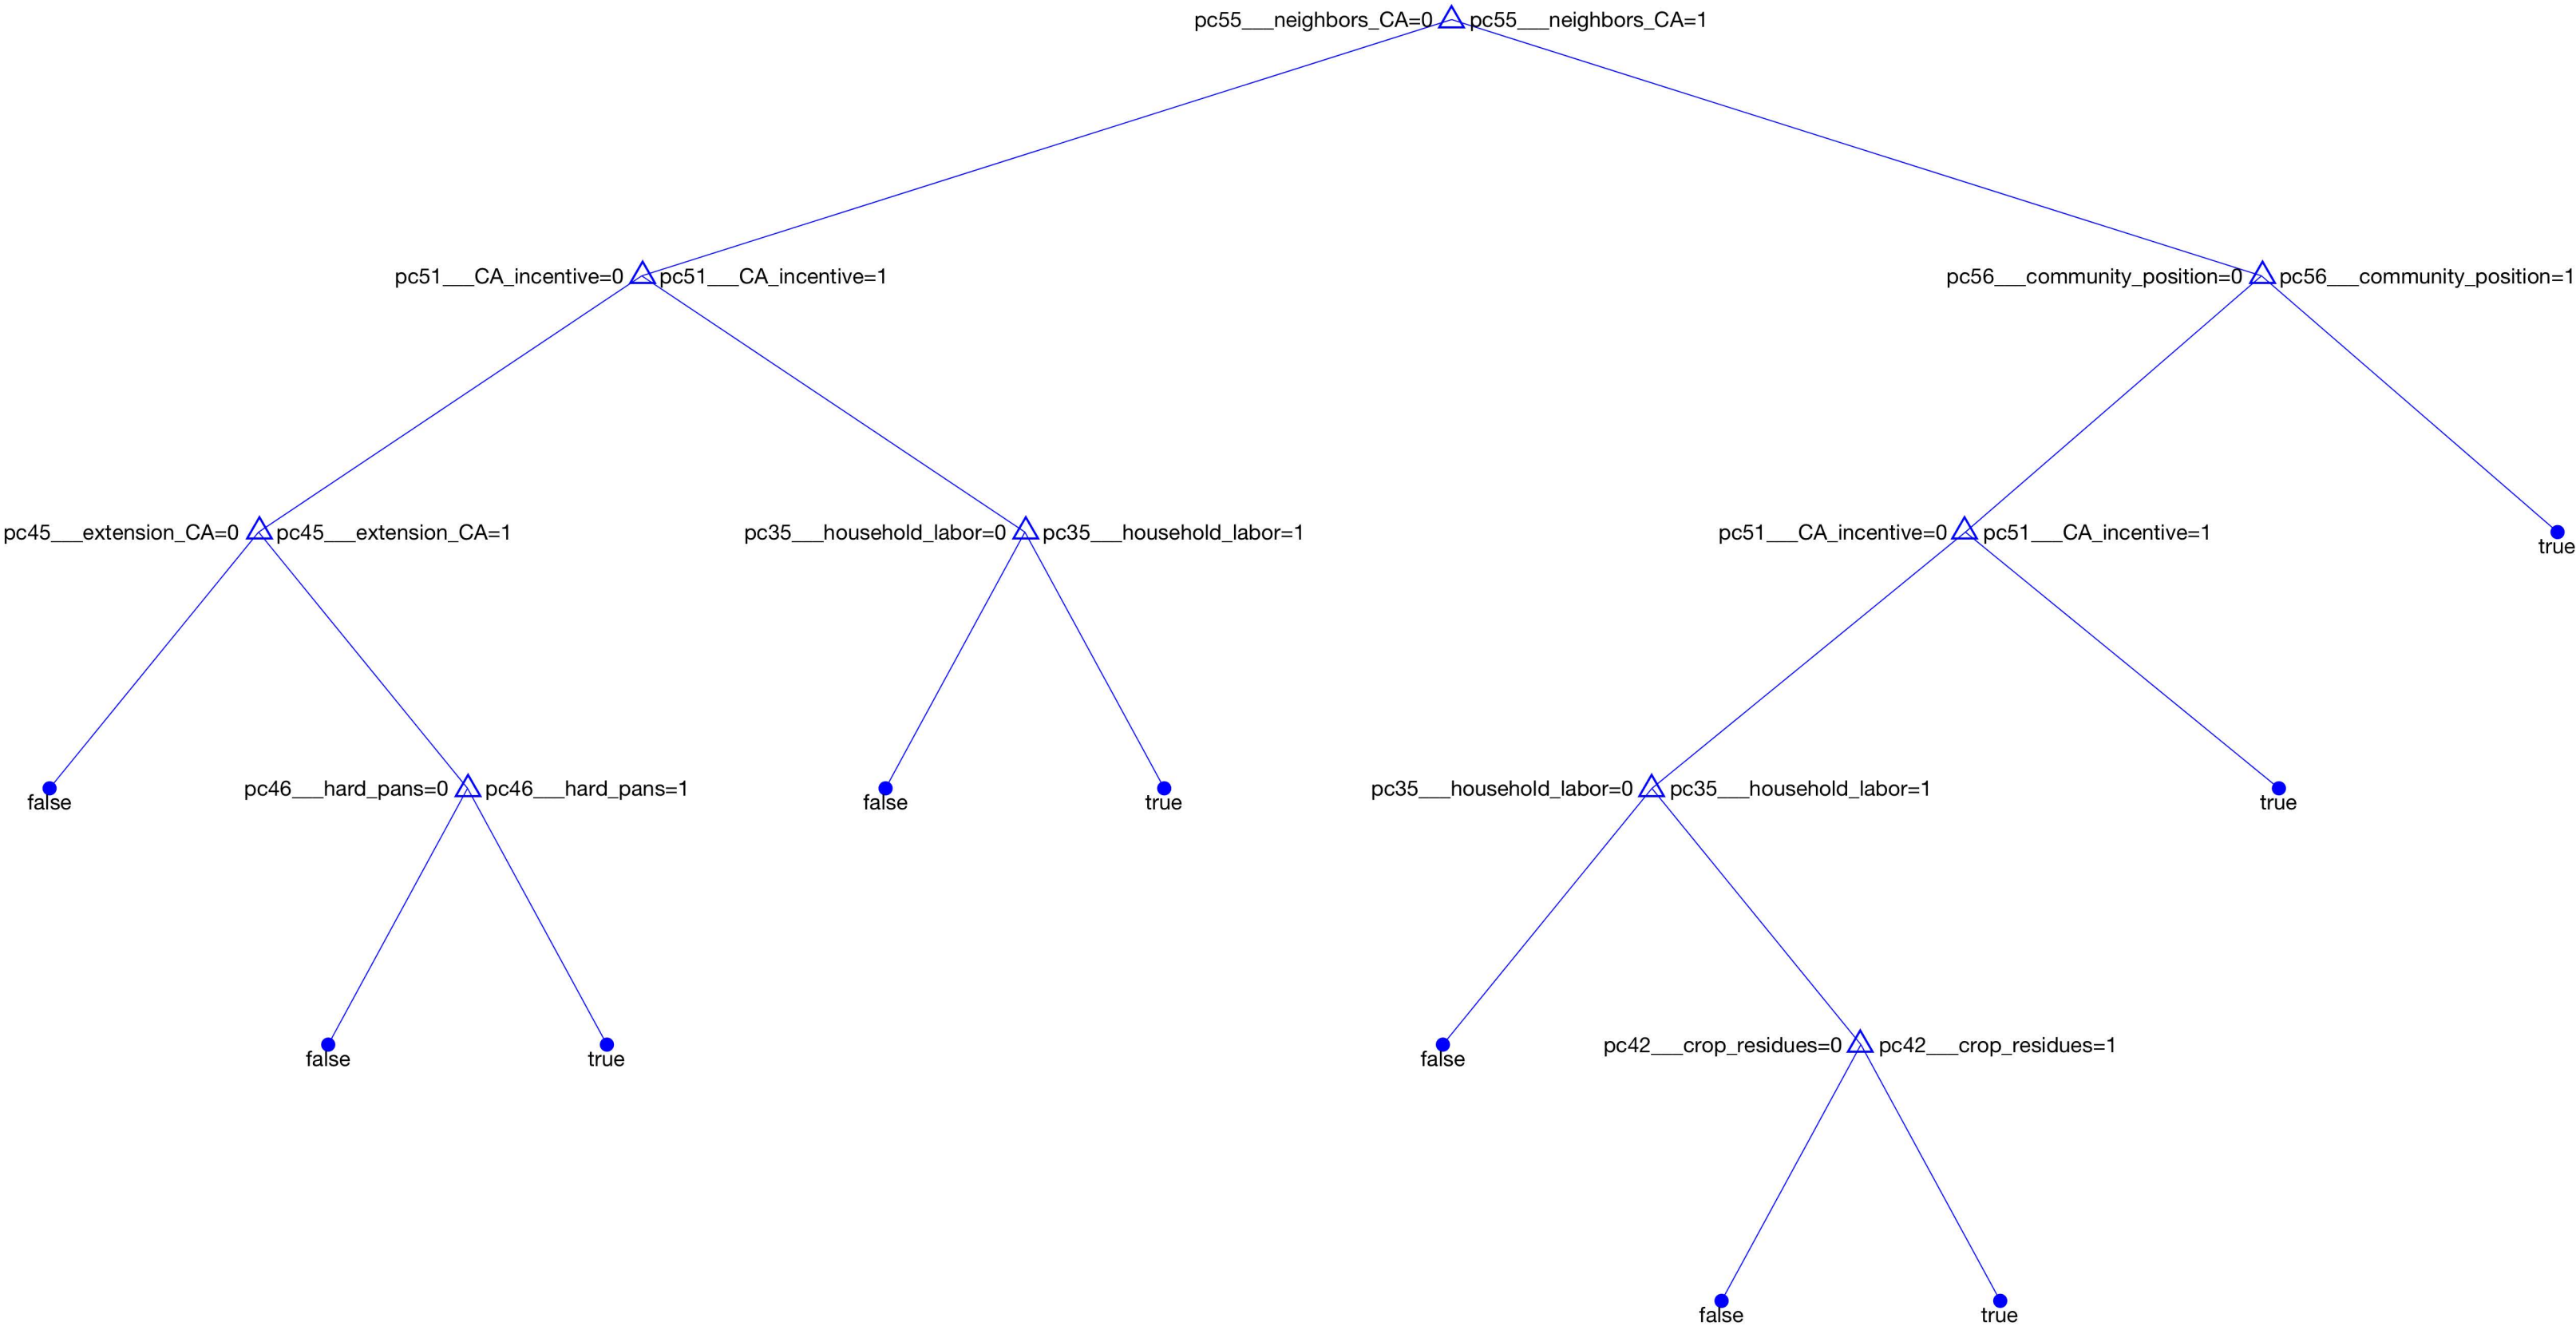

| Node | ProbFalse  | ProbTrue   | Cases |
|------|------------|------------|-------|
| 4    | 0.6969697  | 0.3030303  | 165   |
| 7    | 0.21153846 | 0.78846154 | 156   |
| 8    | 0.76470588 | 0.23529412 | 17    |
| 9    | 0.36231884 | 0.63768116 | 69    |
| 11   | 0.23880597 | 0.76119403 | 67    |
| 12   | 0.77272727 | 0.22727273 | 22    |
| 14   | 0.65217391 | 0.34782609 | 23    |
| 15   | 0.31481481 | 0.68518519 | 54    |

NAP-CR - SE

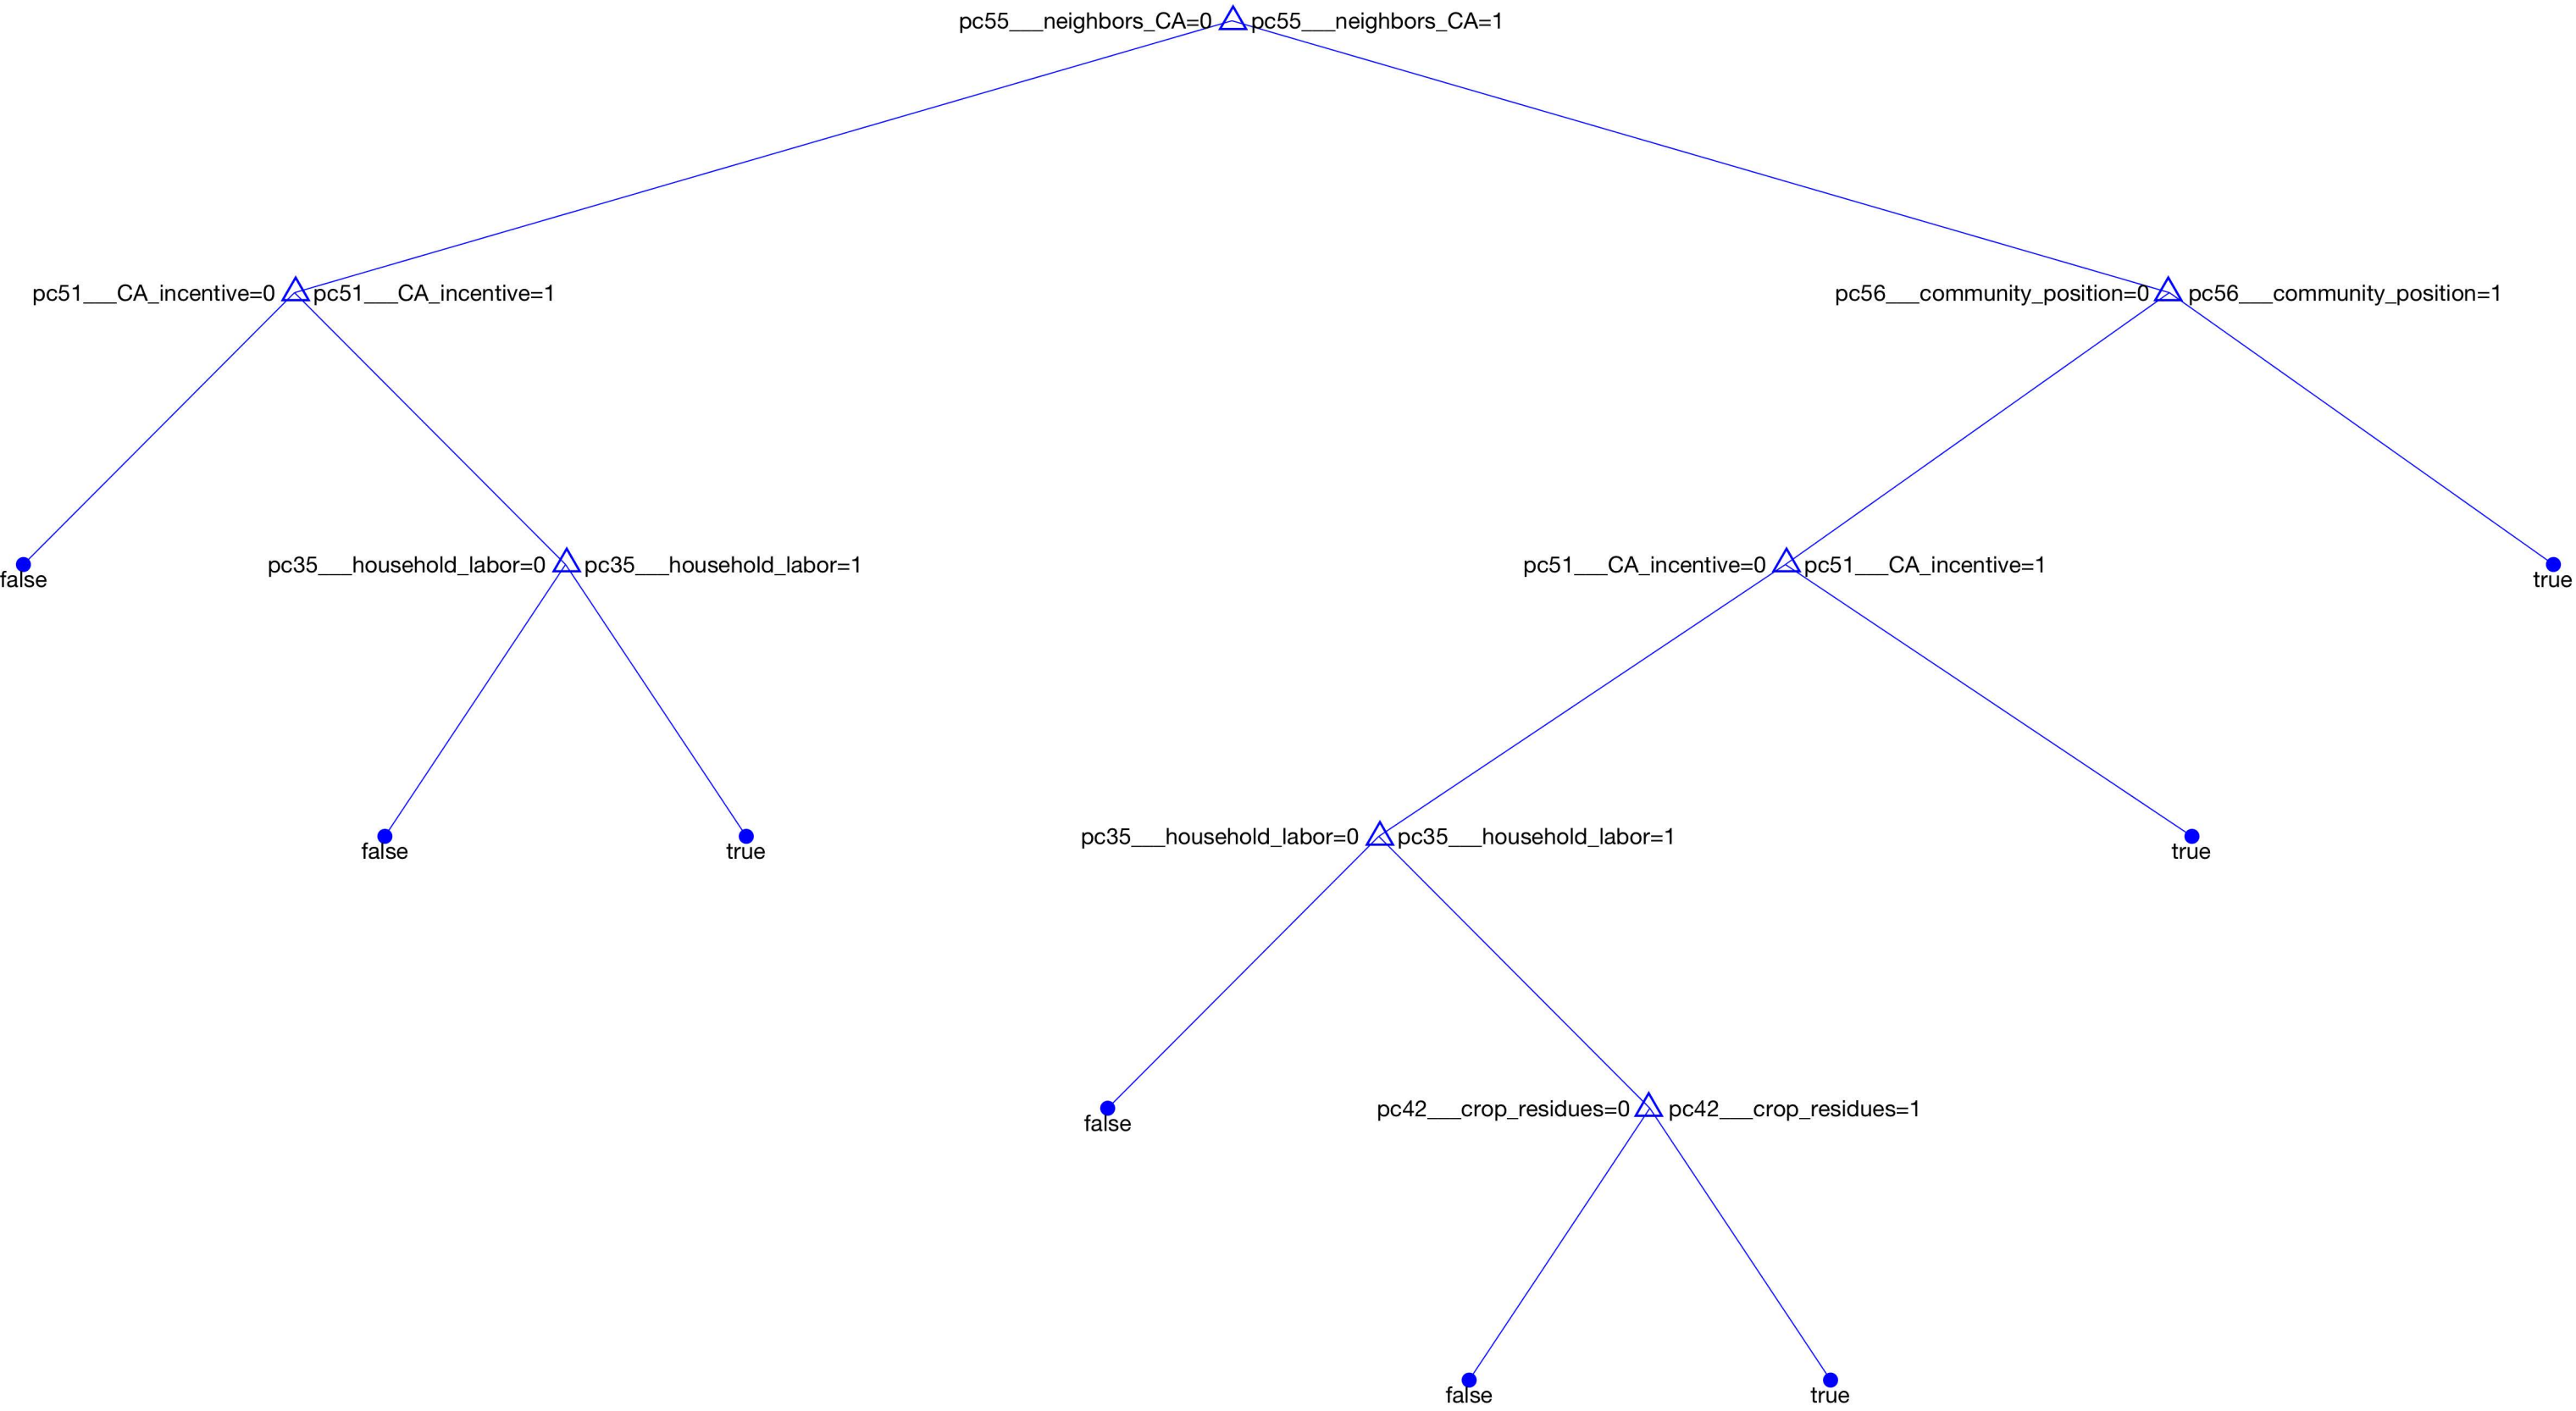

# NAP-IC

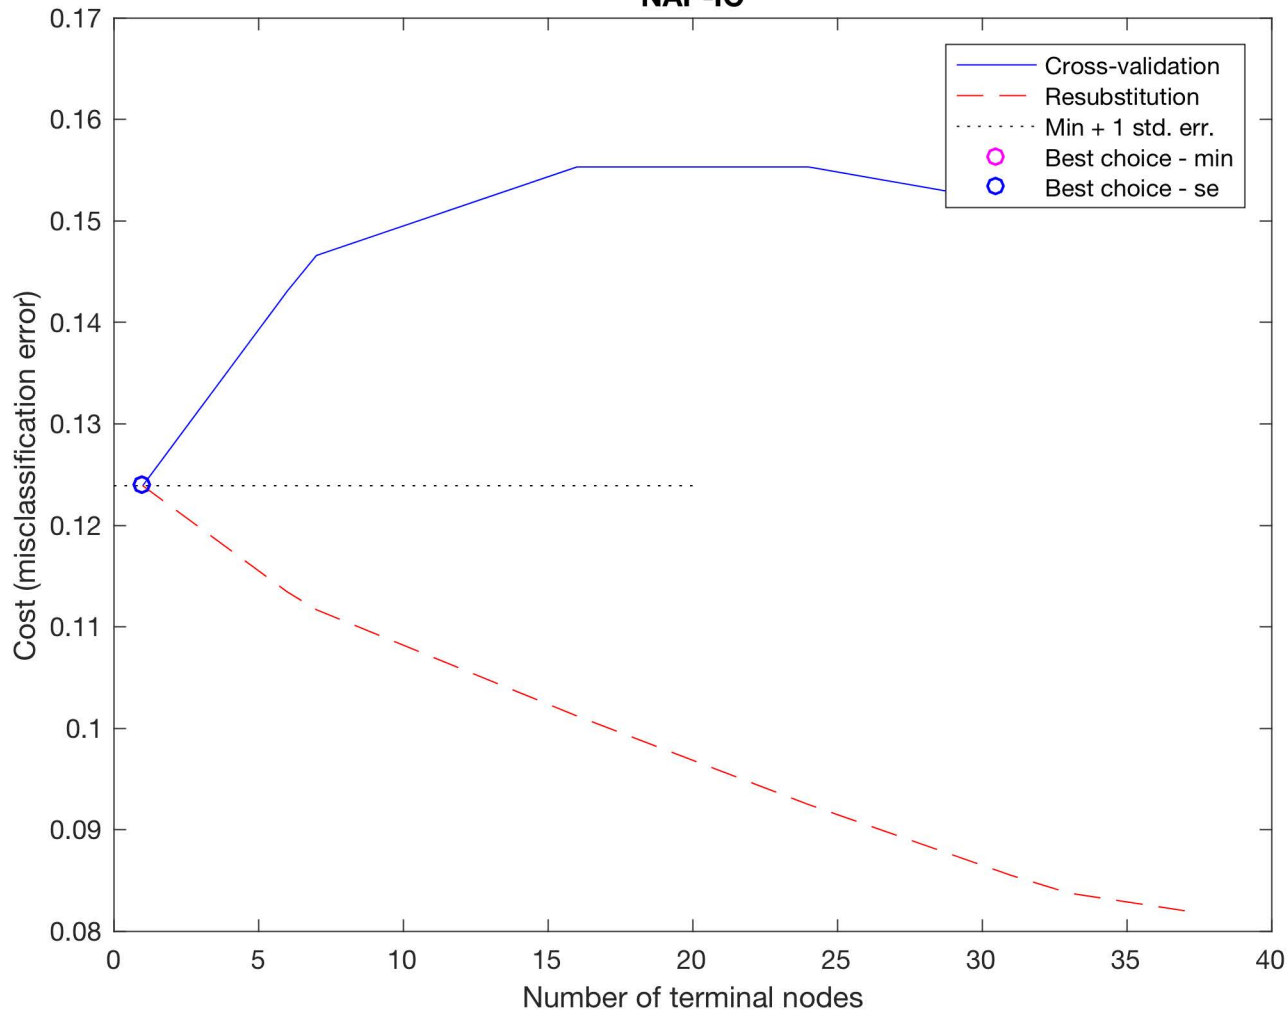

| Node | ProbFalse  | ProbTrue   | Cases |
|------|------------|------------|-------|
| 1    | 0.12390925 | 0.87609075 | 573   |

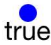

true

| Node | ProbFalse  | ProbTrue   | Cases |
|------|------------|------------|-------|
| 1    | 0.12390925 | 0.87609075 | 573   |



true



# NAP-ZT

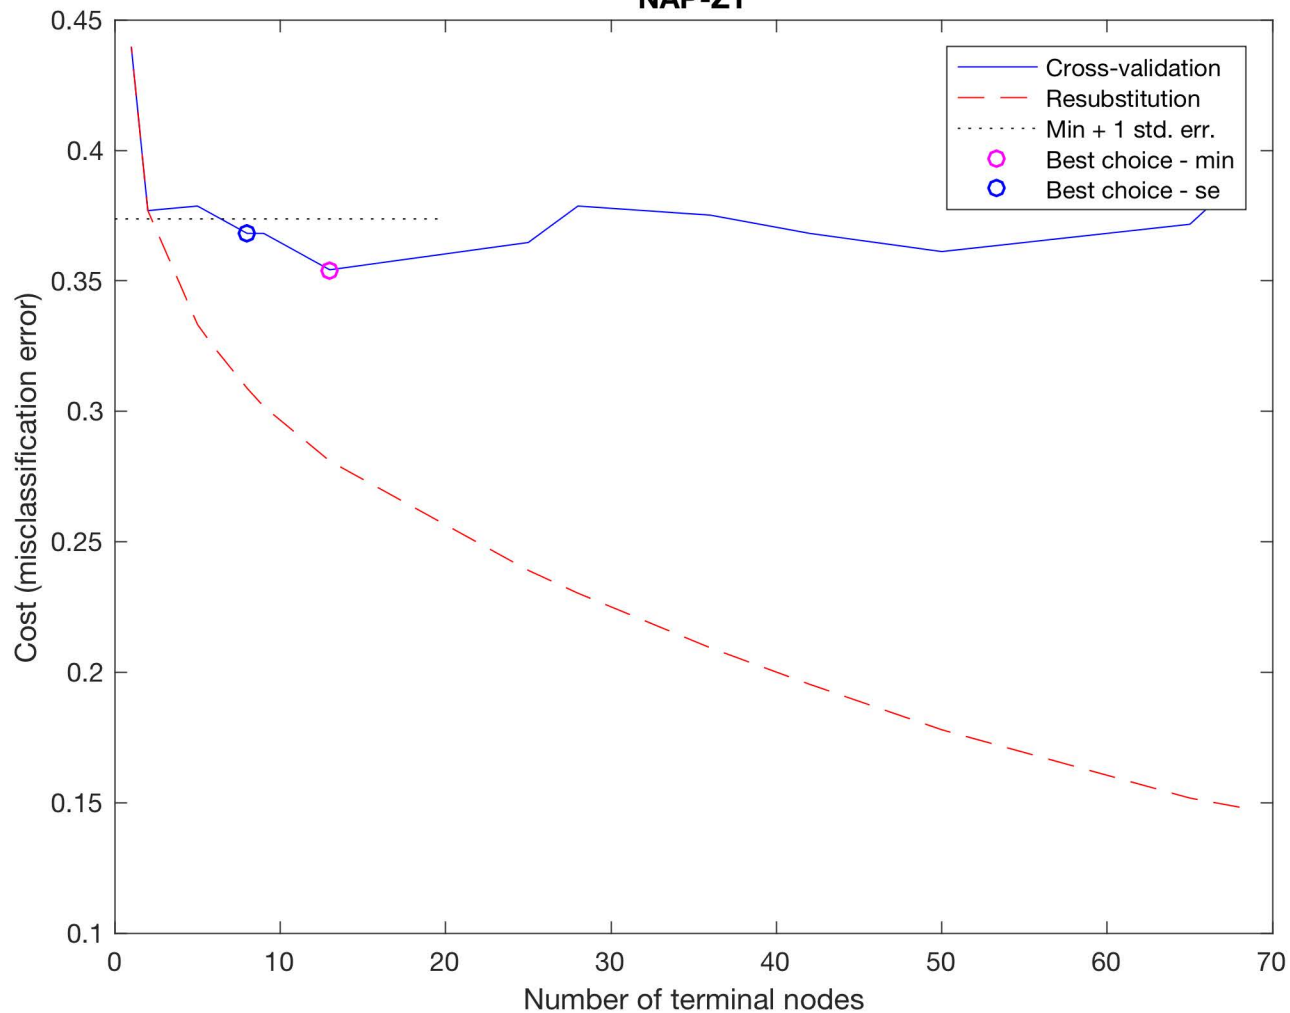

| Node | ProbFalse  | ProbTrue   | Cases |
|------|------------|------------|-------|
| 4    | 0.80188679 | 0.19811321 | 106   |
| 8    | 0.74157303 | 0.25842697 | 89    |
| 13   | 0.125      | 0.875      | 32    |
| 14   | 0.38461538 | 0.61538462 | 39    |
| 15   | 0.70588235 | 0.29411765 | 17    |
| 16   | 0          | 1          | 3     |
| 17   | 0.94444444 | 0.05555556 | 18    |
| 18   | 0.71428571 | 0.28571429 | 28    |
| 20   | 0.27692308 | 0.72307692 | 65    |
| 21   | 0.62857143 | 0.37142857 | 35    |
| 22   | 0.328125   | 0.671875   | 64    |
| 24   | 0.33333333 | 0.66666667 | 12    |
| 25   | 0.56923077 | 0.43076923 | 65    |

NAP-ZT - MIN

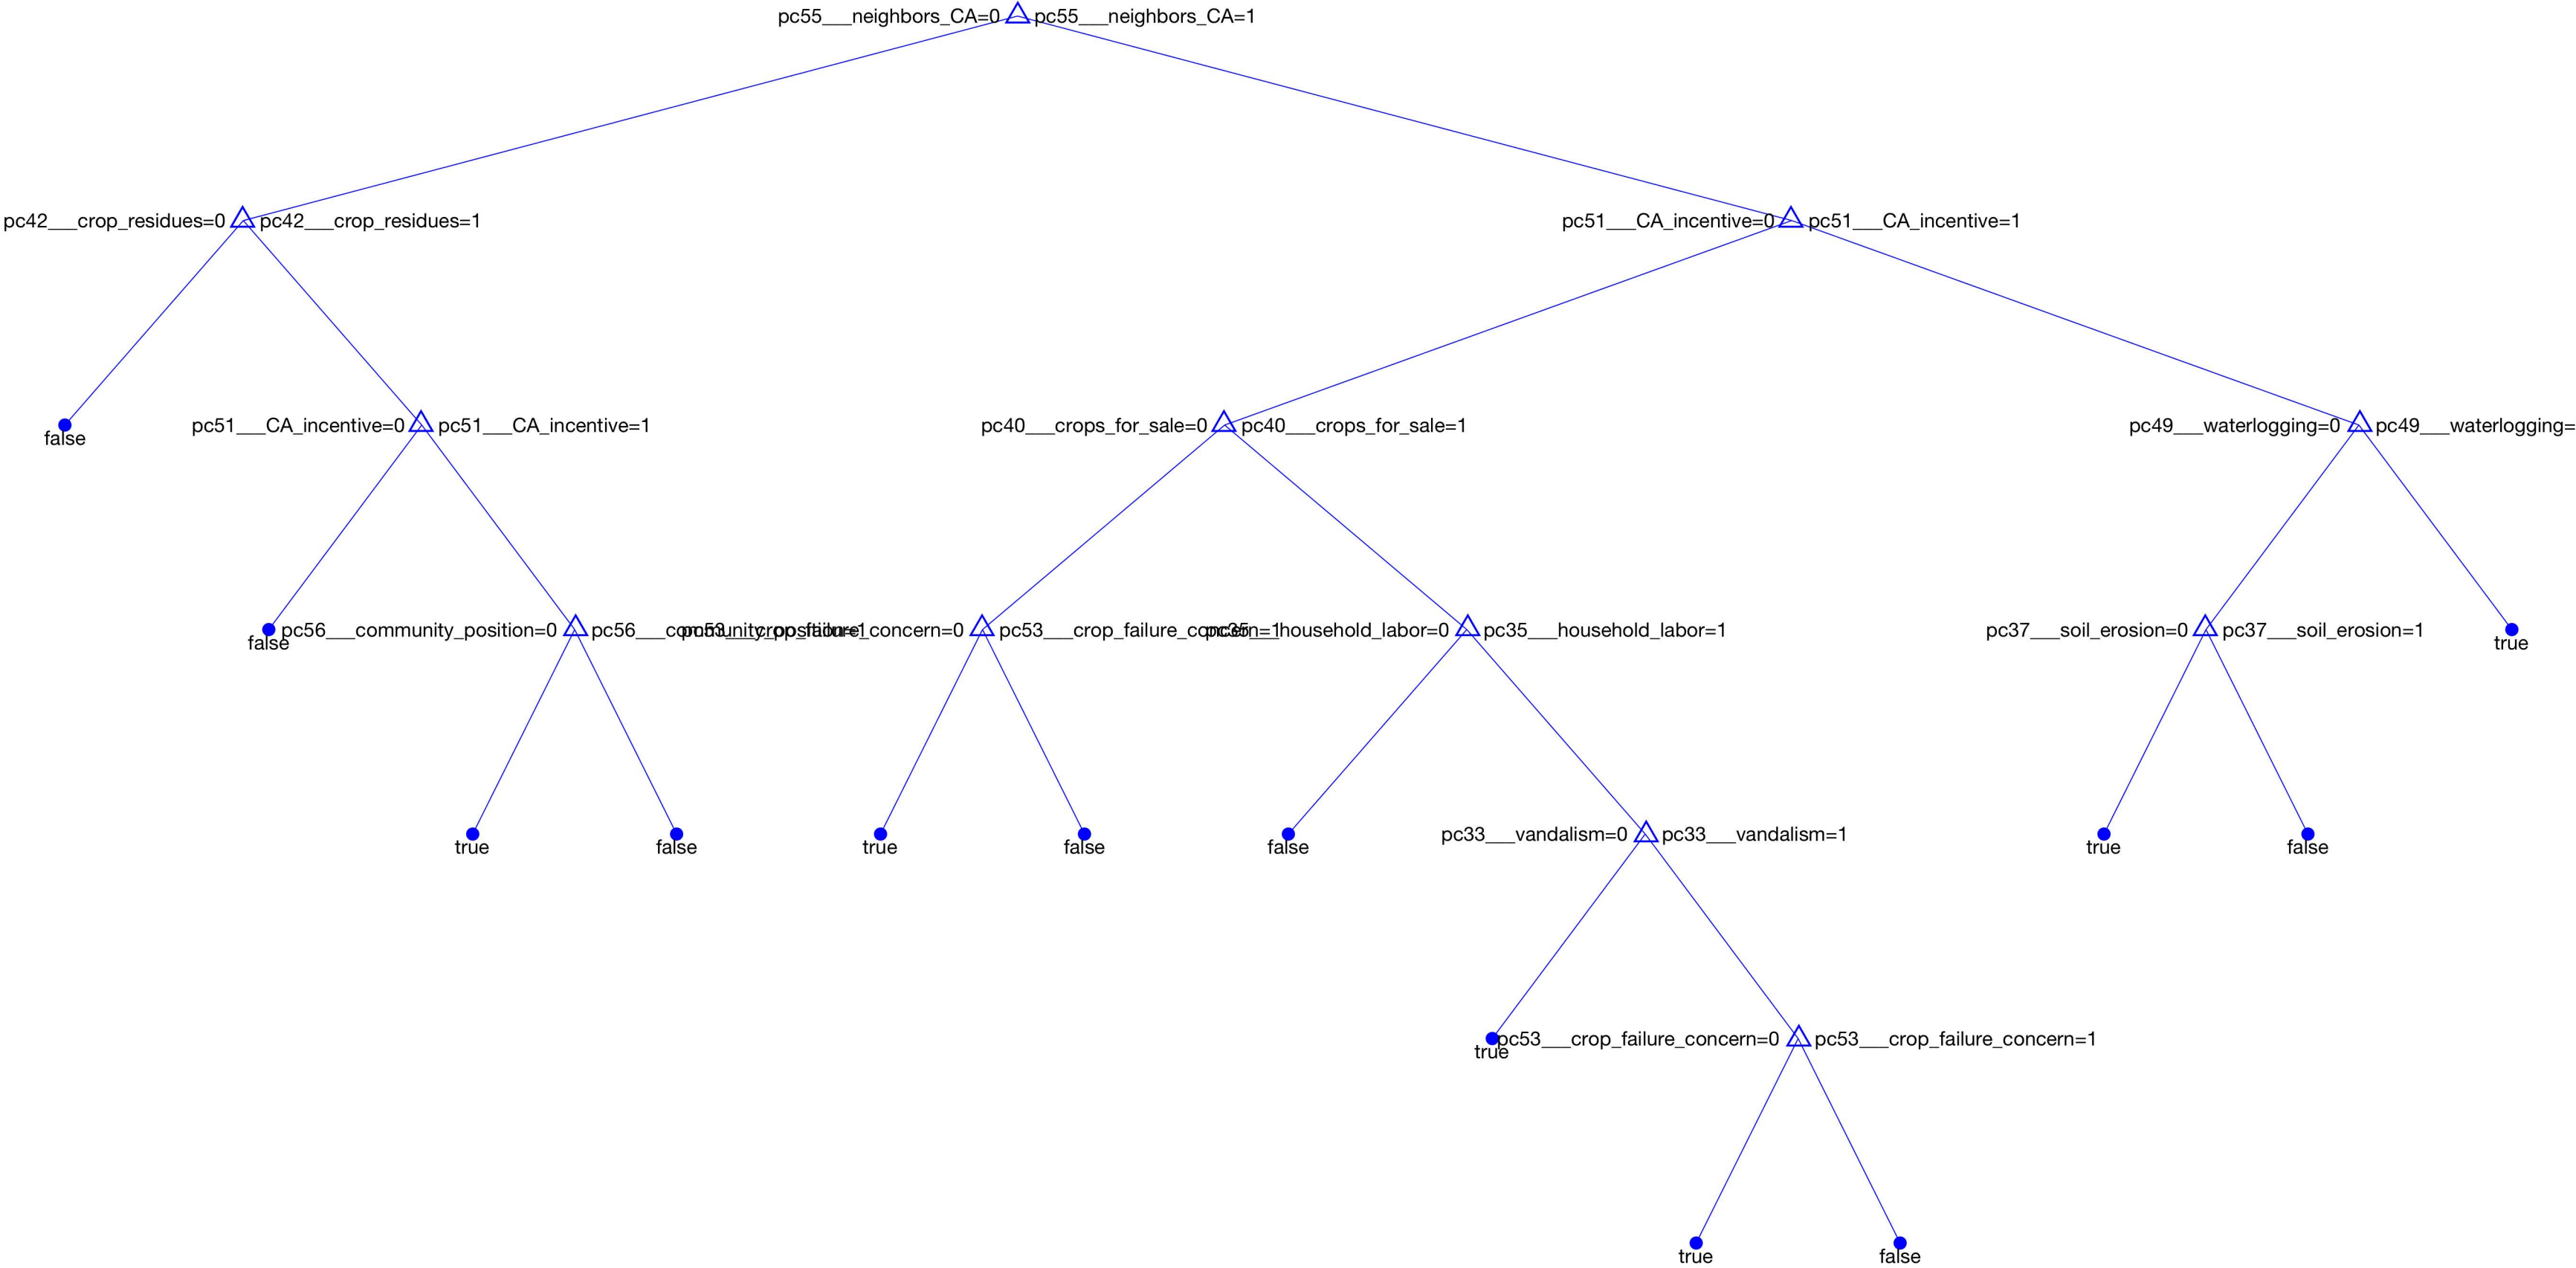

| Node | ProbFalse  | ProbTrue   | Cases |
|------|------------|------------|-------|
| 2    | 0.70916335 | 0.29083665 | 251   |
| 6    | 0.80952381 | 0.19047619 | 21    |
| 9    | 0.125      | 0.875      | 32    |
| 10   | 0.71428571 | 0.28571429 | 28    |
| 12   | 0.27692308 | 0.72307692 | 65    |
| 13   | 0.62857143 | 0.37142857 | 35    |
| 14   | 0.328125   | 0.671875   | 64    |
| 15   | 0.53246753 | 0.46753247 | 77    |

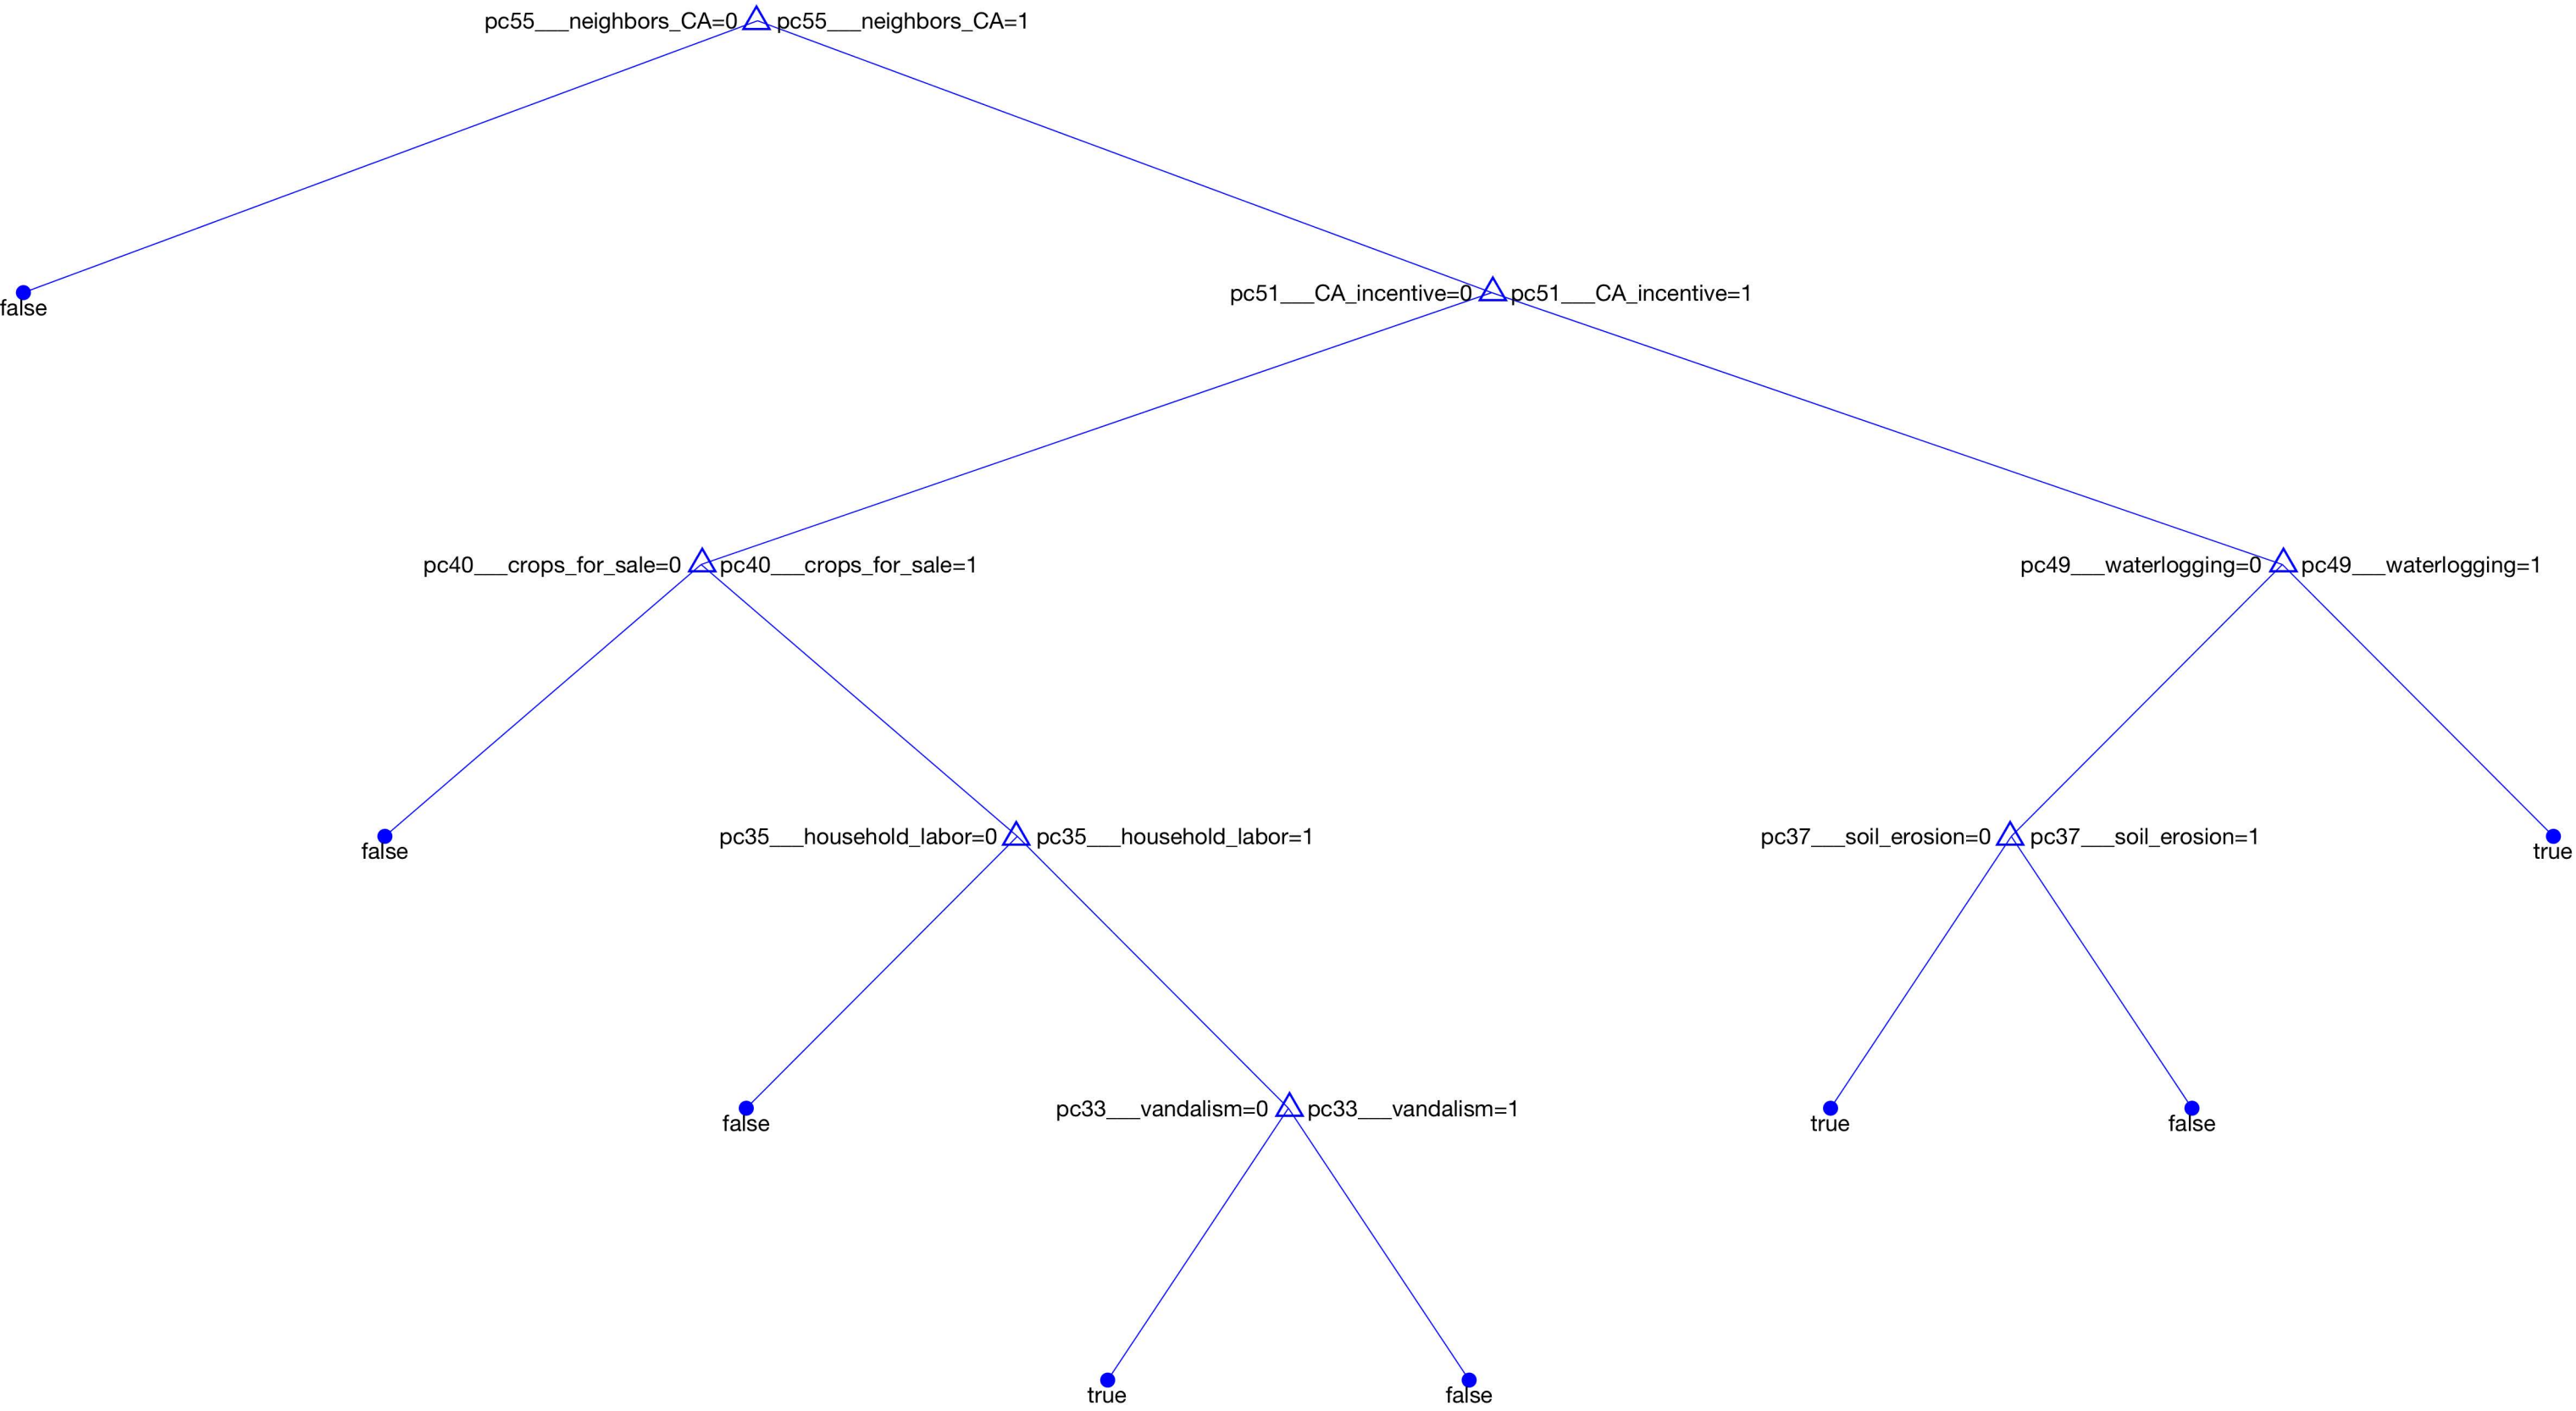

Supplement: s1 [file s1]
